# Supplementary material for: Shikonin Inhibits Cell Growth of Sunitinib-Resistant Renal Cell Carcinoma by Activating the Necrosome Complex and Inhibiting the AKT/mTOR Signaling Pathway
Source: MDPI journal article supplement (doi:10.3390/cancers14051114), 2022-02-22
Supplement: s1 [file s1]

# Cell cycle regulating proteins

p21, p27, Cyclin A, Cyclin B, CDK1, pCDK1, CDK2, pCDK2

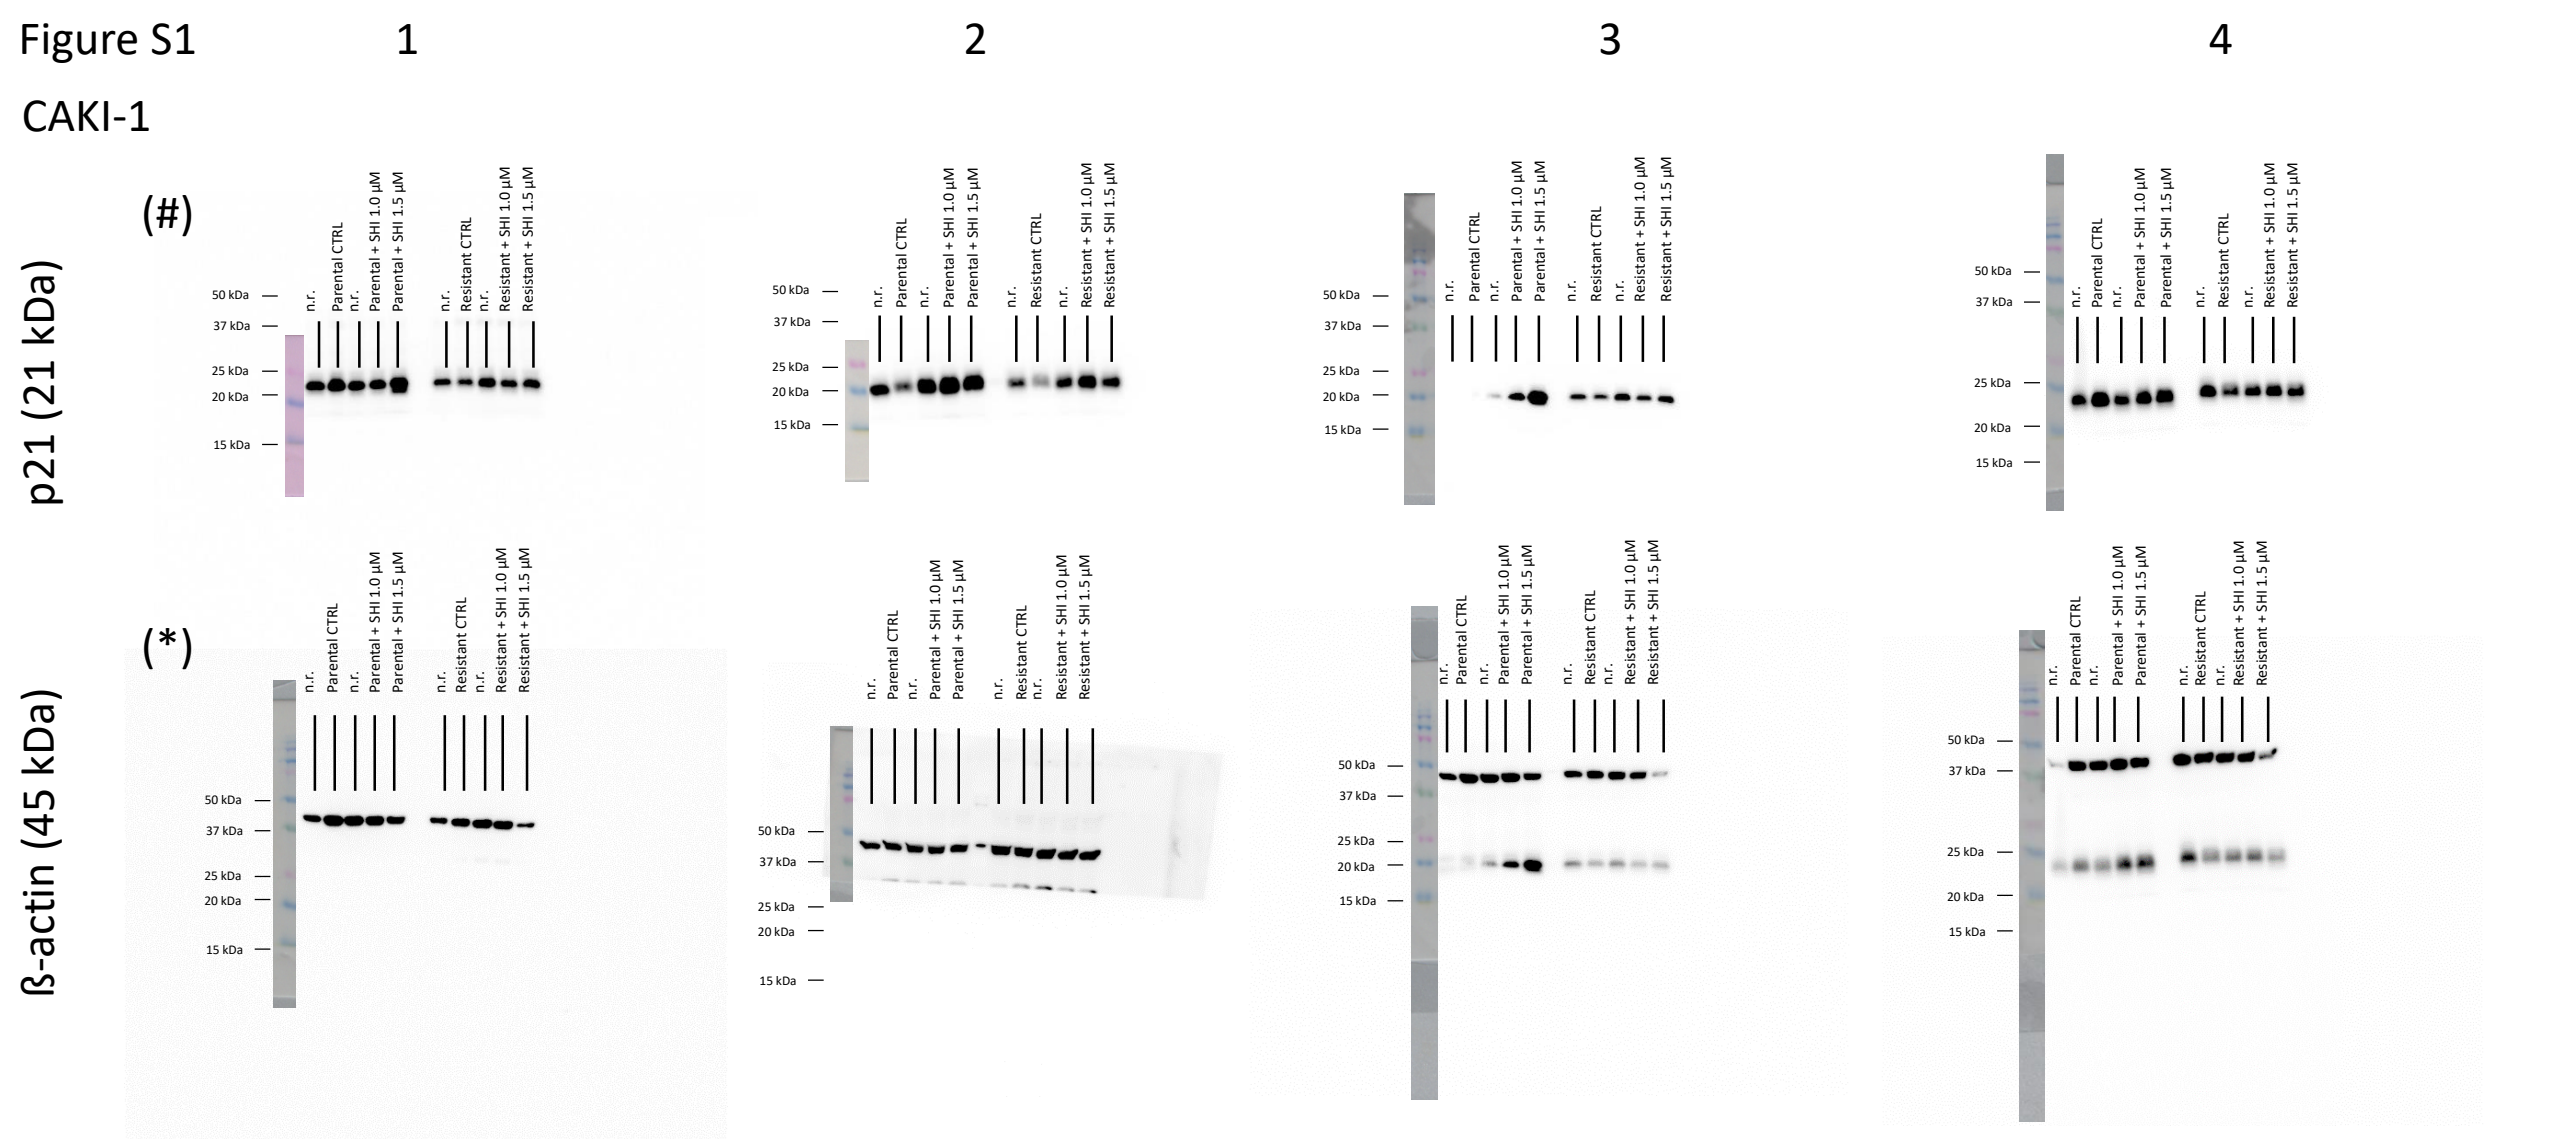

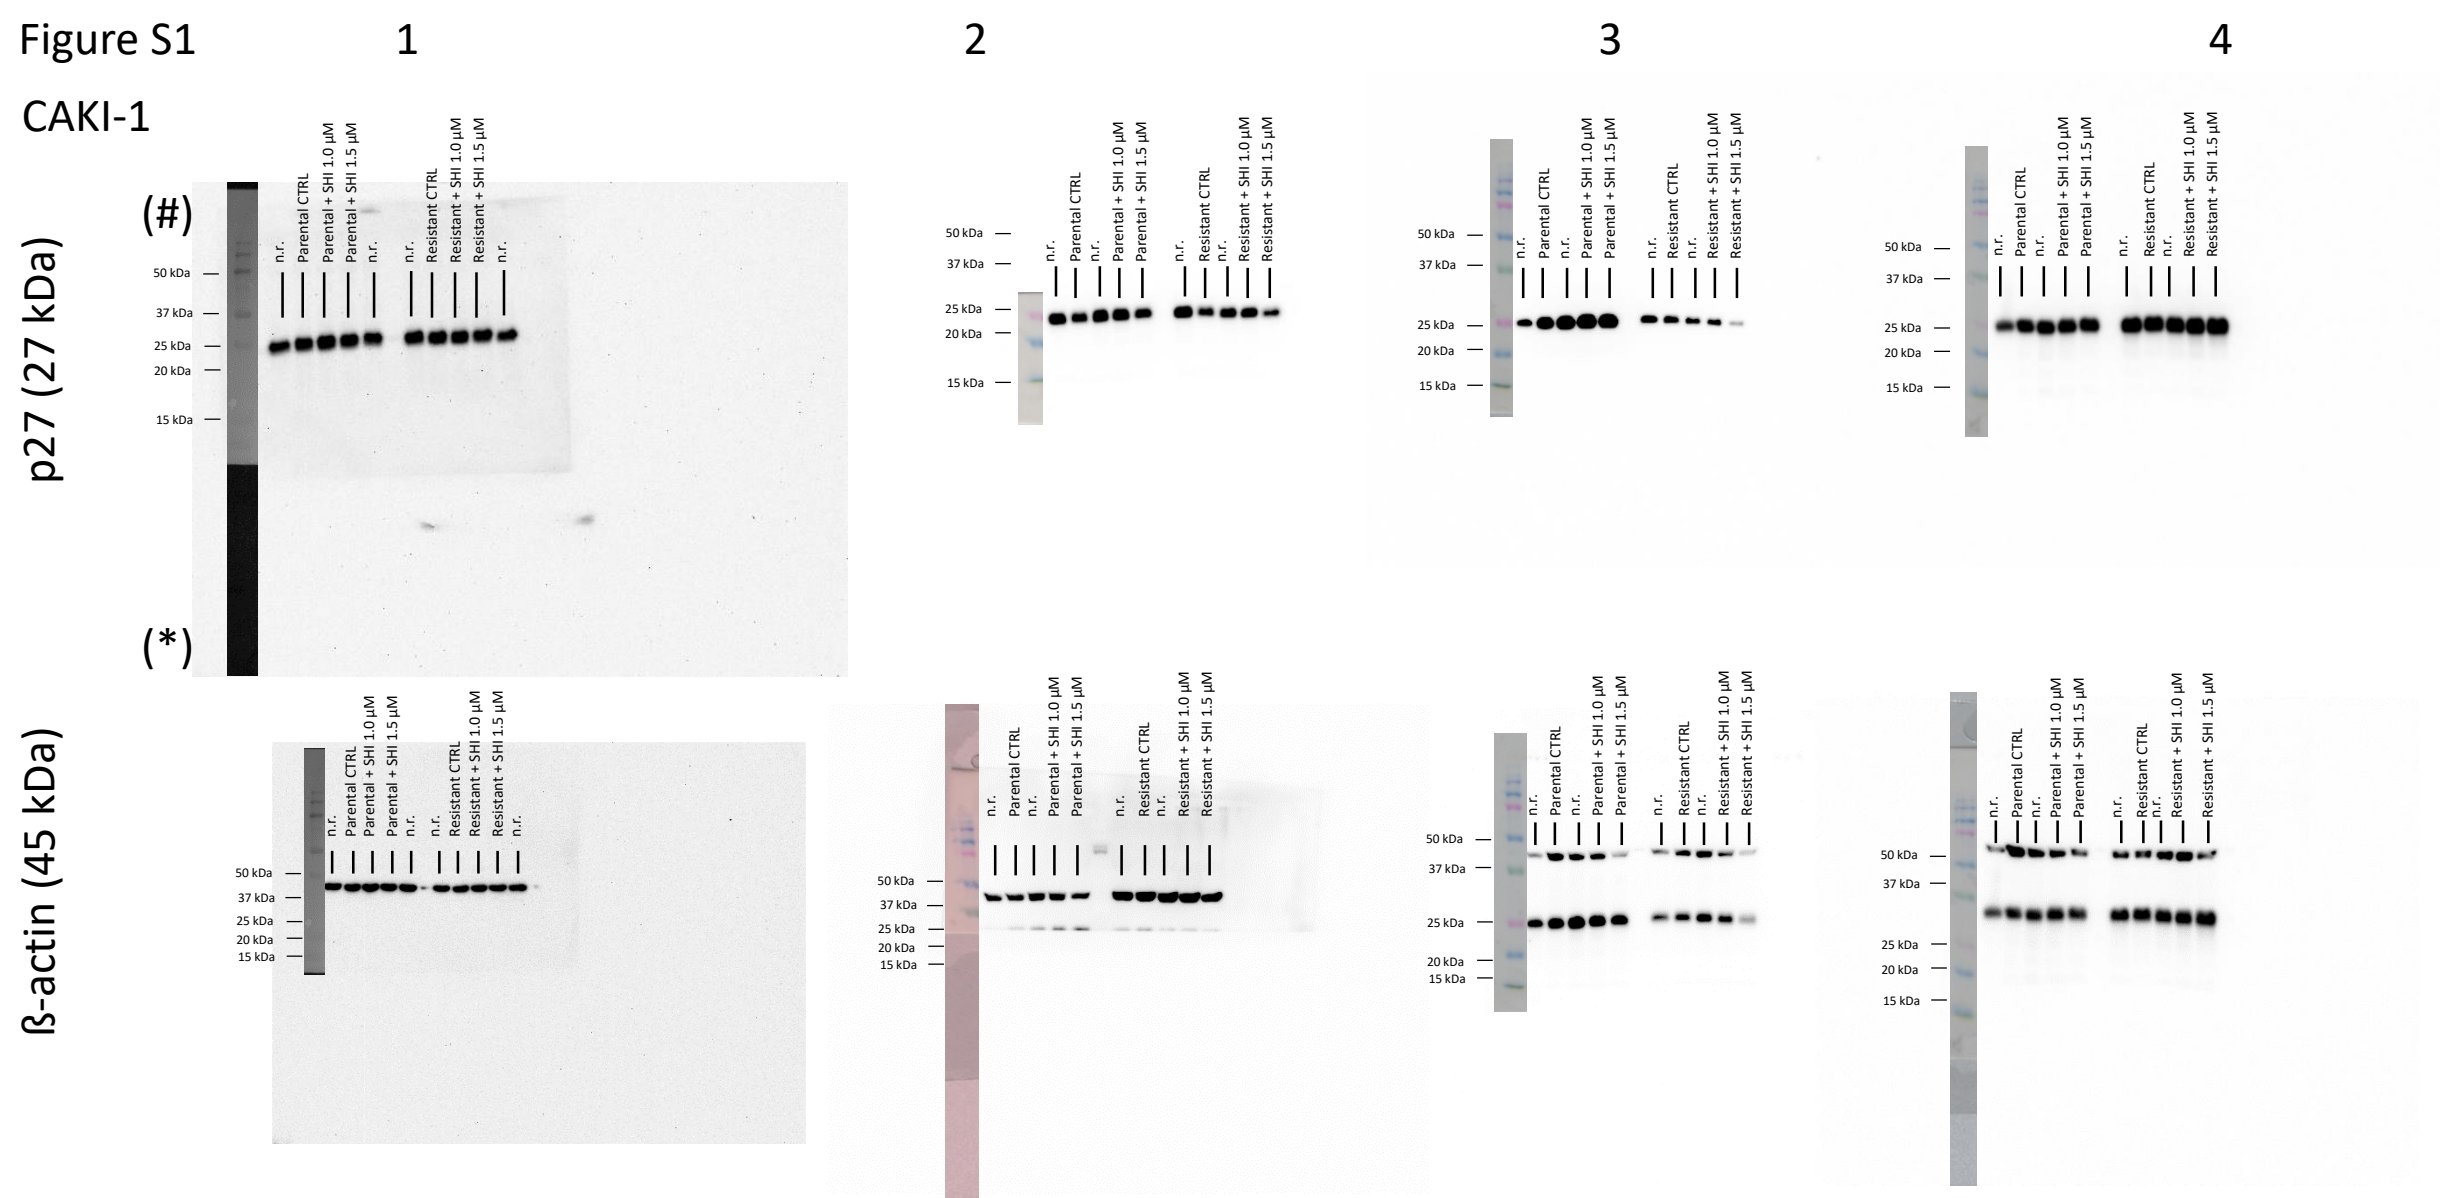

Figure S1b: Detailed information about Figure 4 - Protein expression and activity of cell cycle regulating proteins in parental and sunitinib-resistant Caki-1 cells after 48 h exposure to 1 or 1.5  $\mu$ M SHI. Protein expression of p27 (#), corresponding protein expression of  $\beta$ -actin (\*). n.r. = not relevant.

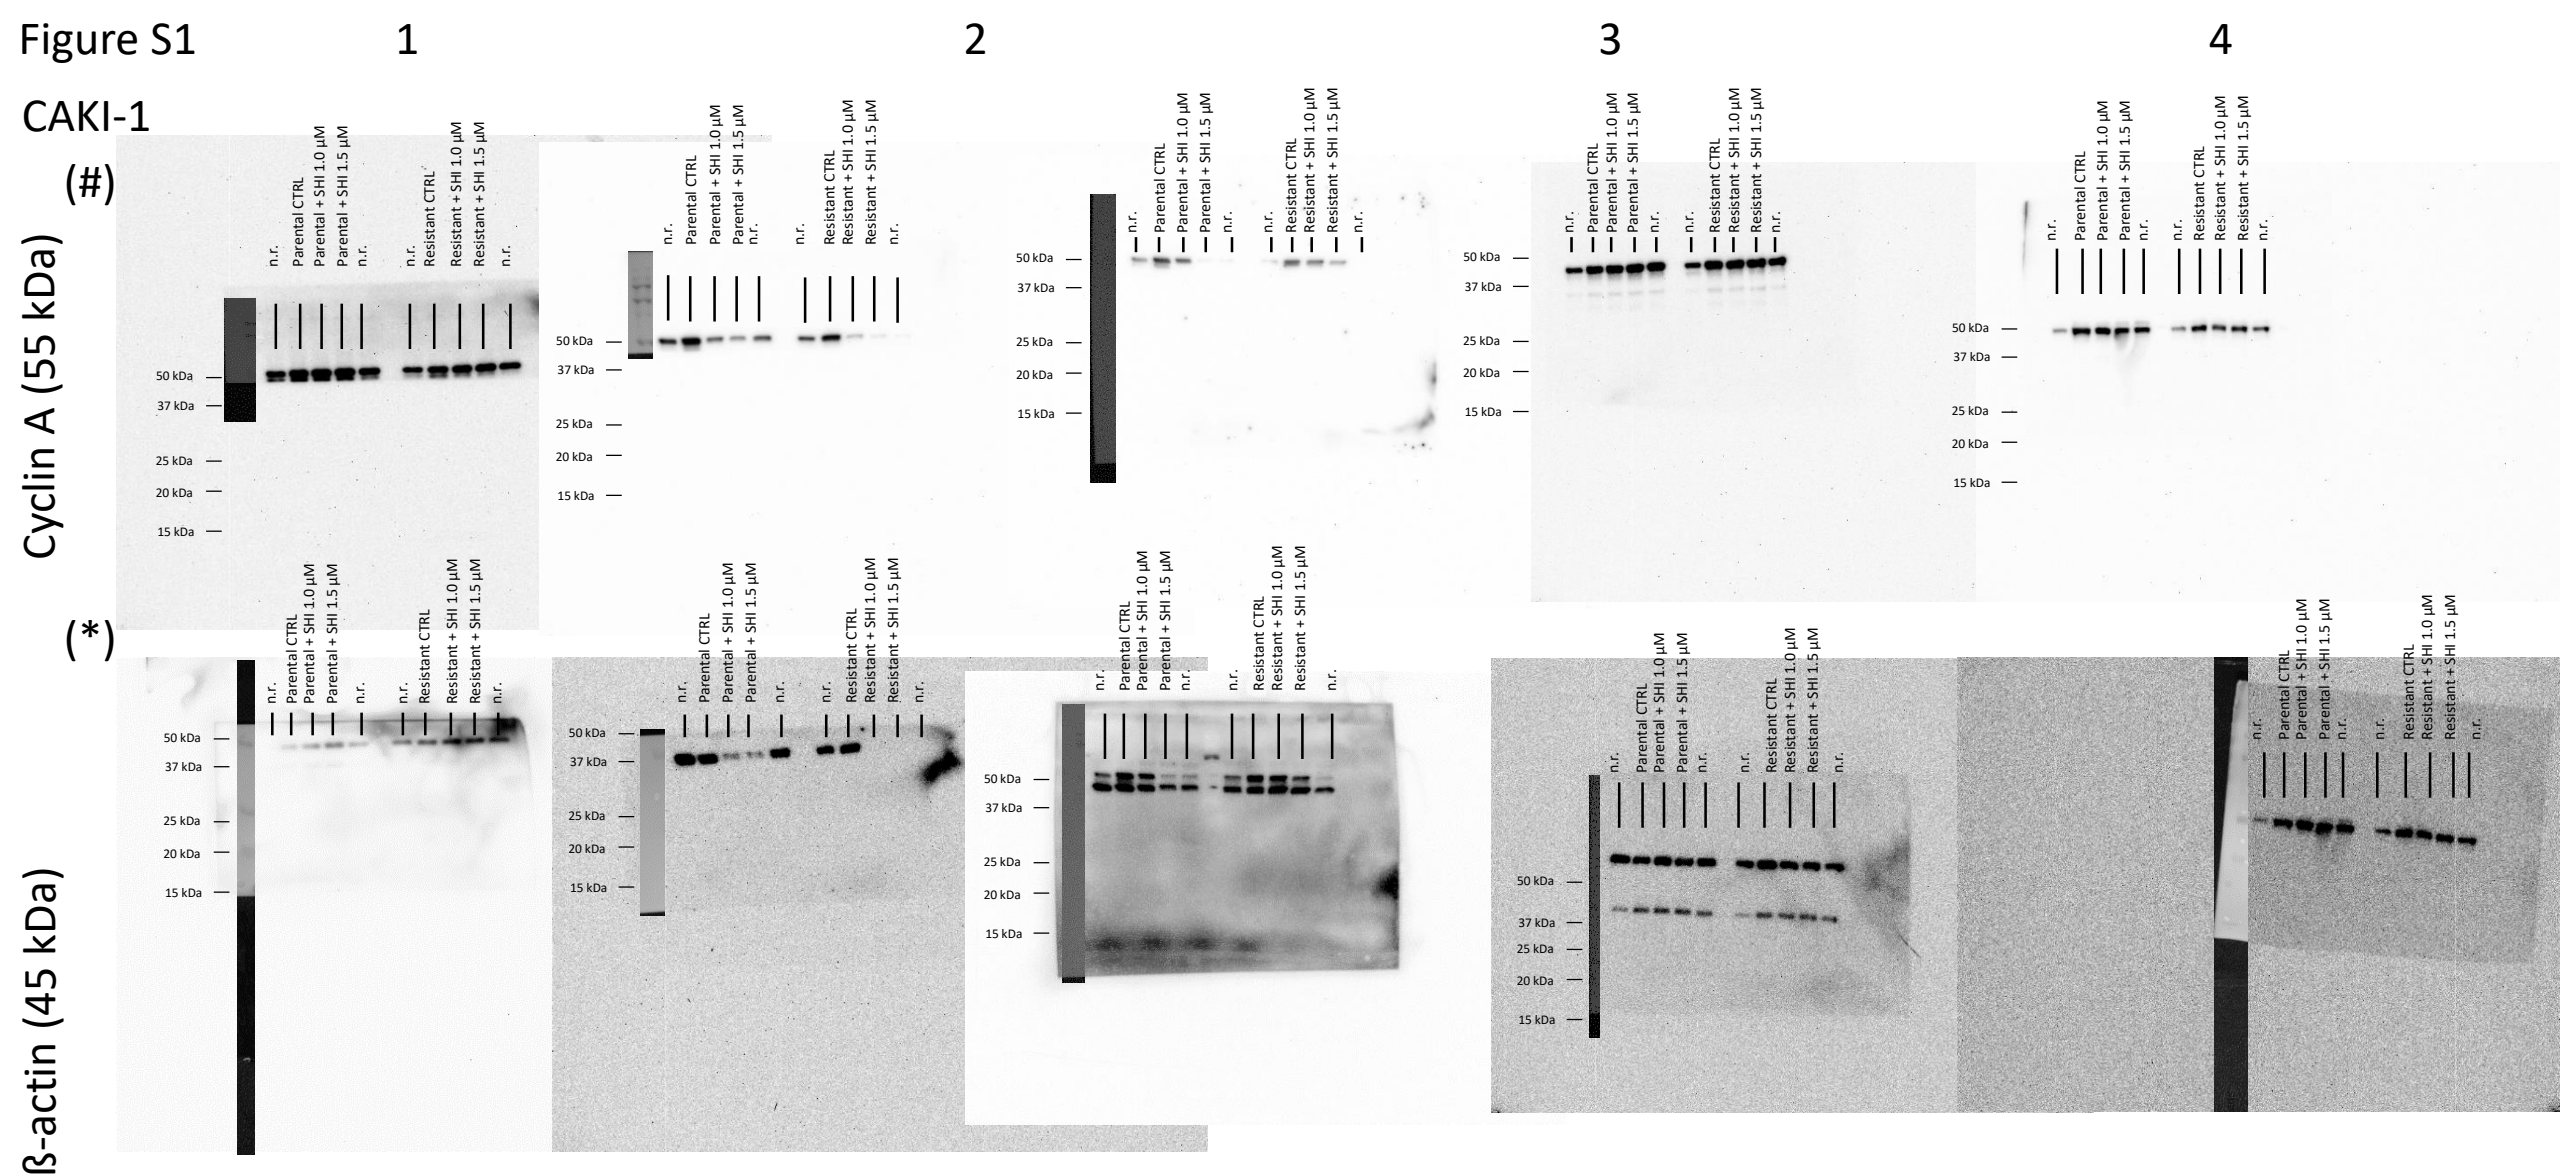

Figure S1c: Detailed information about Figure 4 - Protein expression and activity of cell cycle regulating proteins in parental and sunitinib-resistant Caki-1 cells after 48 h exposure to 1 or 1.5  $\mu$ M SHI. Protein expression of Cyclin A (#), corresponding protein expression of  $\beta$ -actin (\*). n.r. = not relevant.



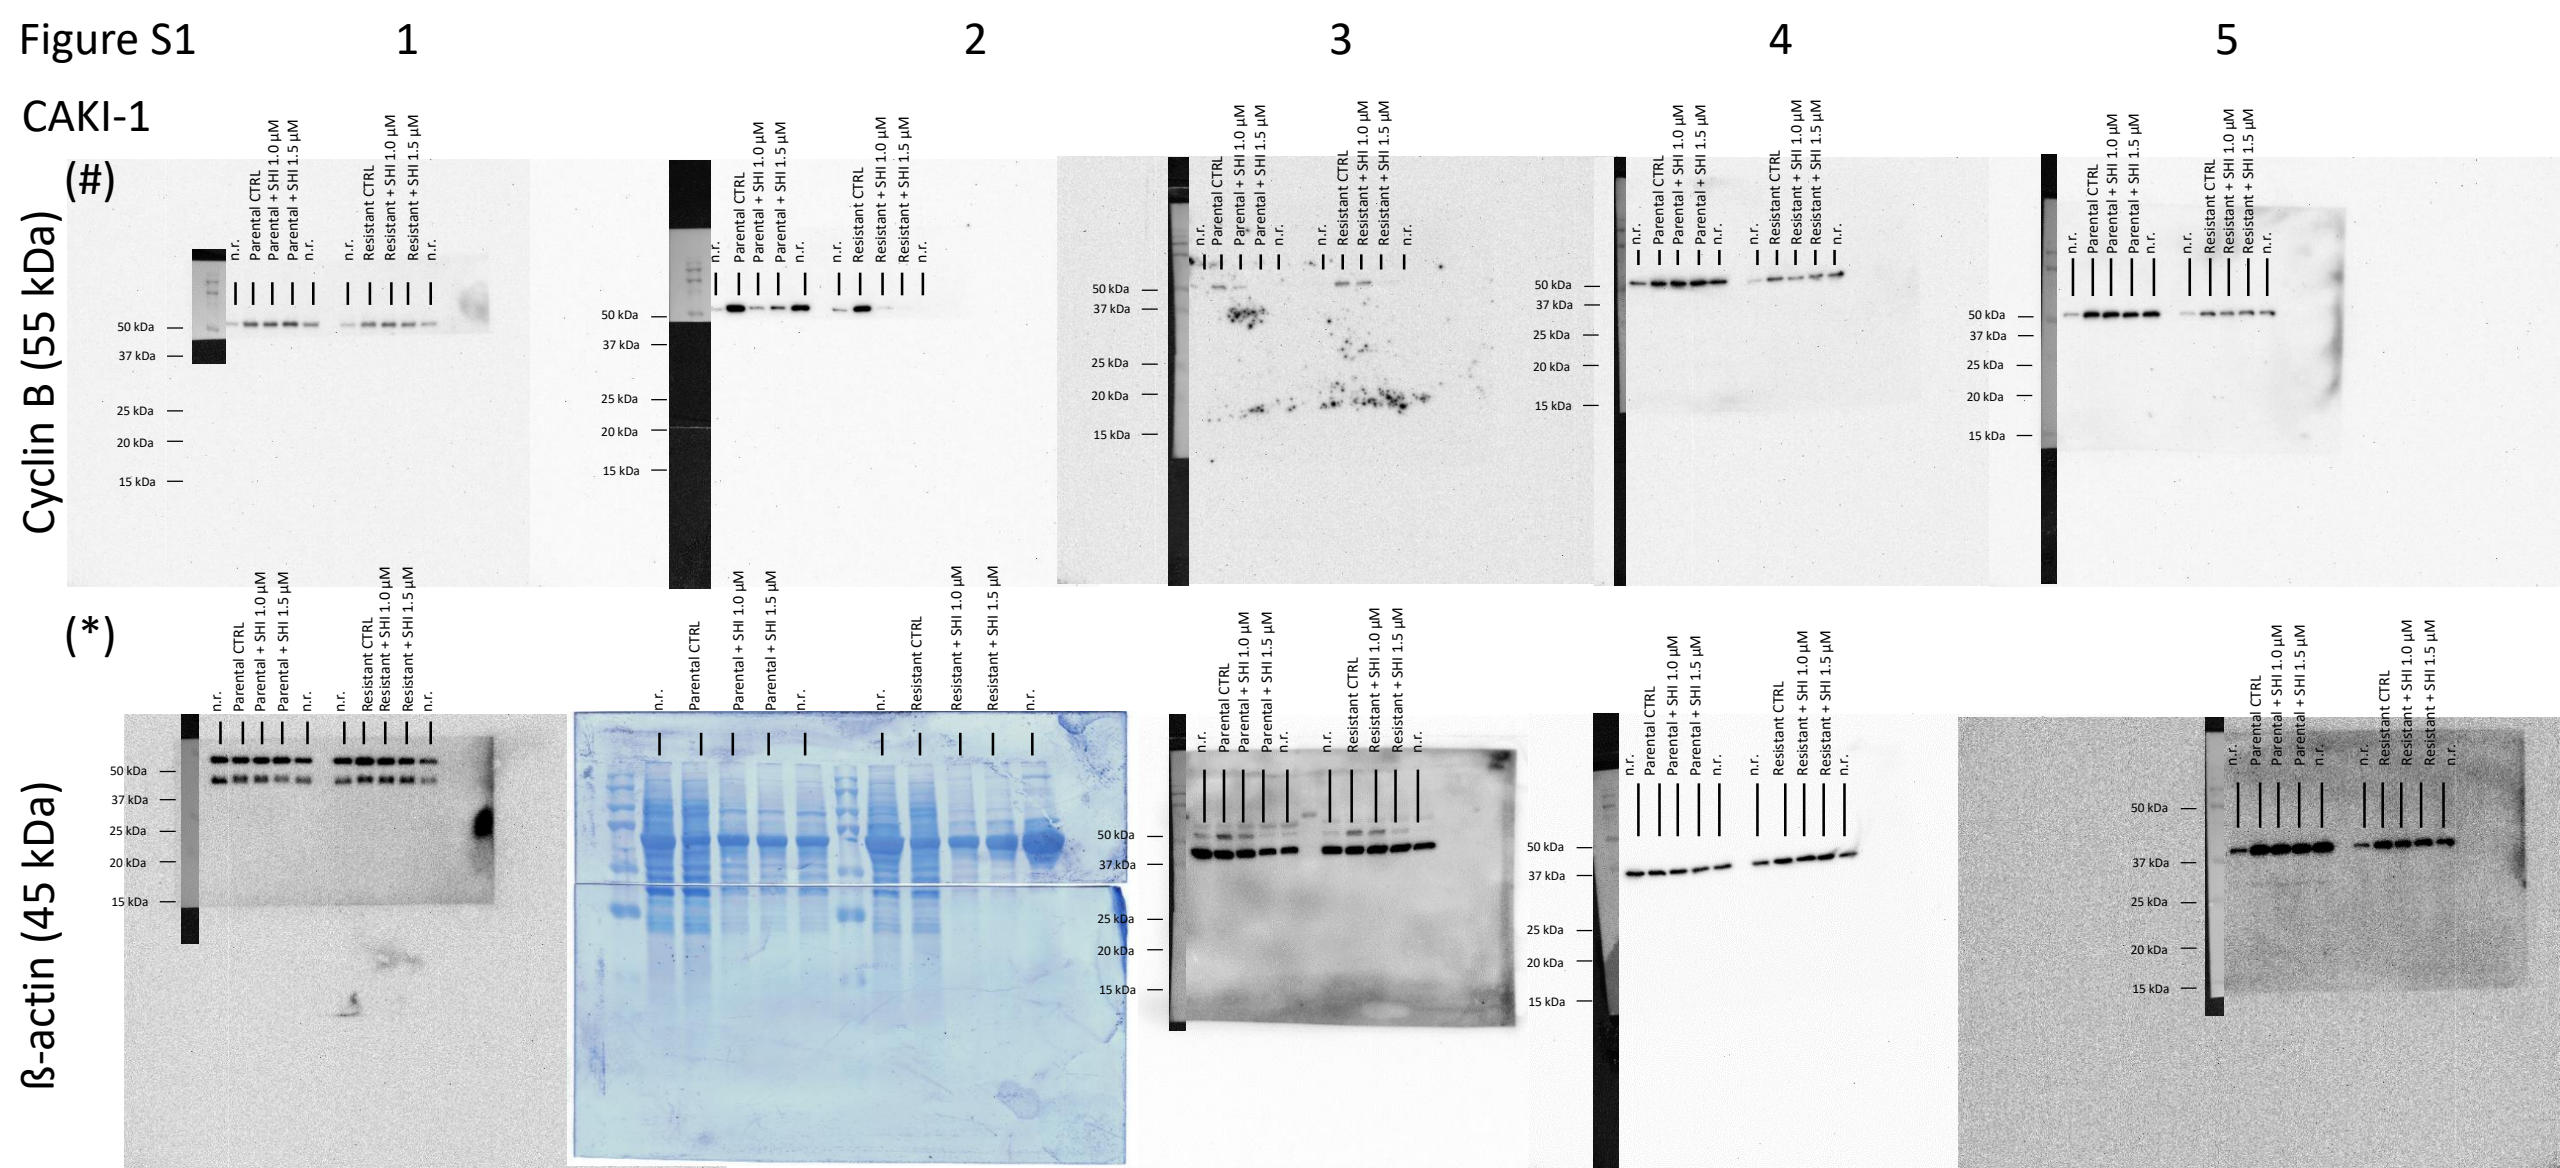

Figure S1d: Detailed information about Figure 4 - Protein expression and activity of cell cycle regulating proteins in parental and sunitinib-resistant Caki-1 cells after 48 h exposure to 1 or 1.5  $\mu$ M SHI. Protein expression of Cyclin B (#), corresponding protein expression of  $\beta$ -actin or Coomassie blue staining of total protein (\*). n.r. = not relevant.

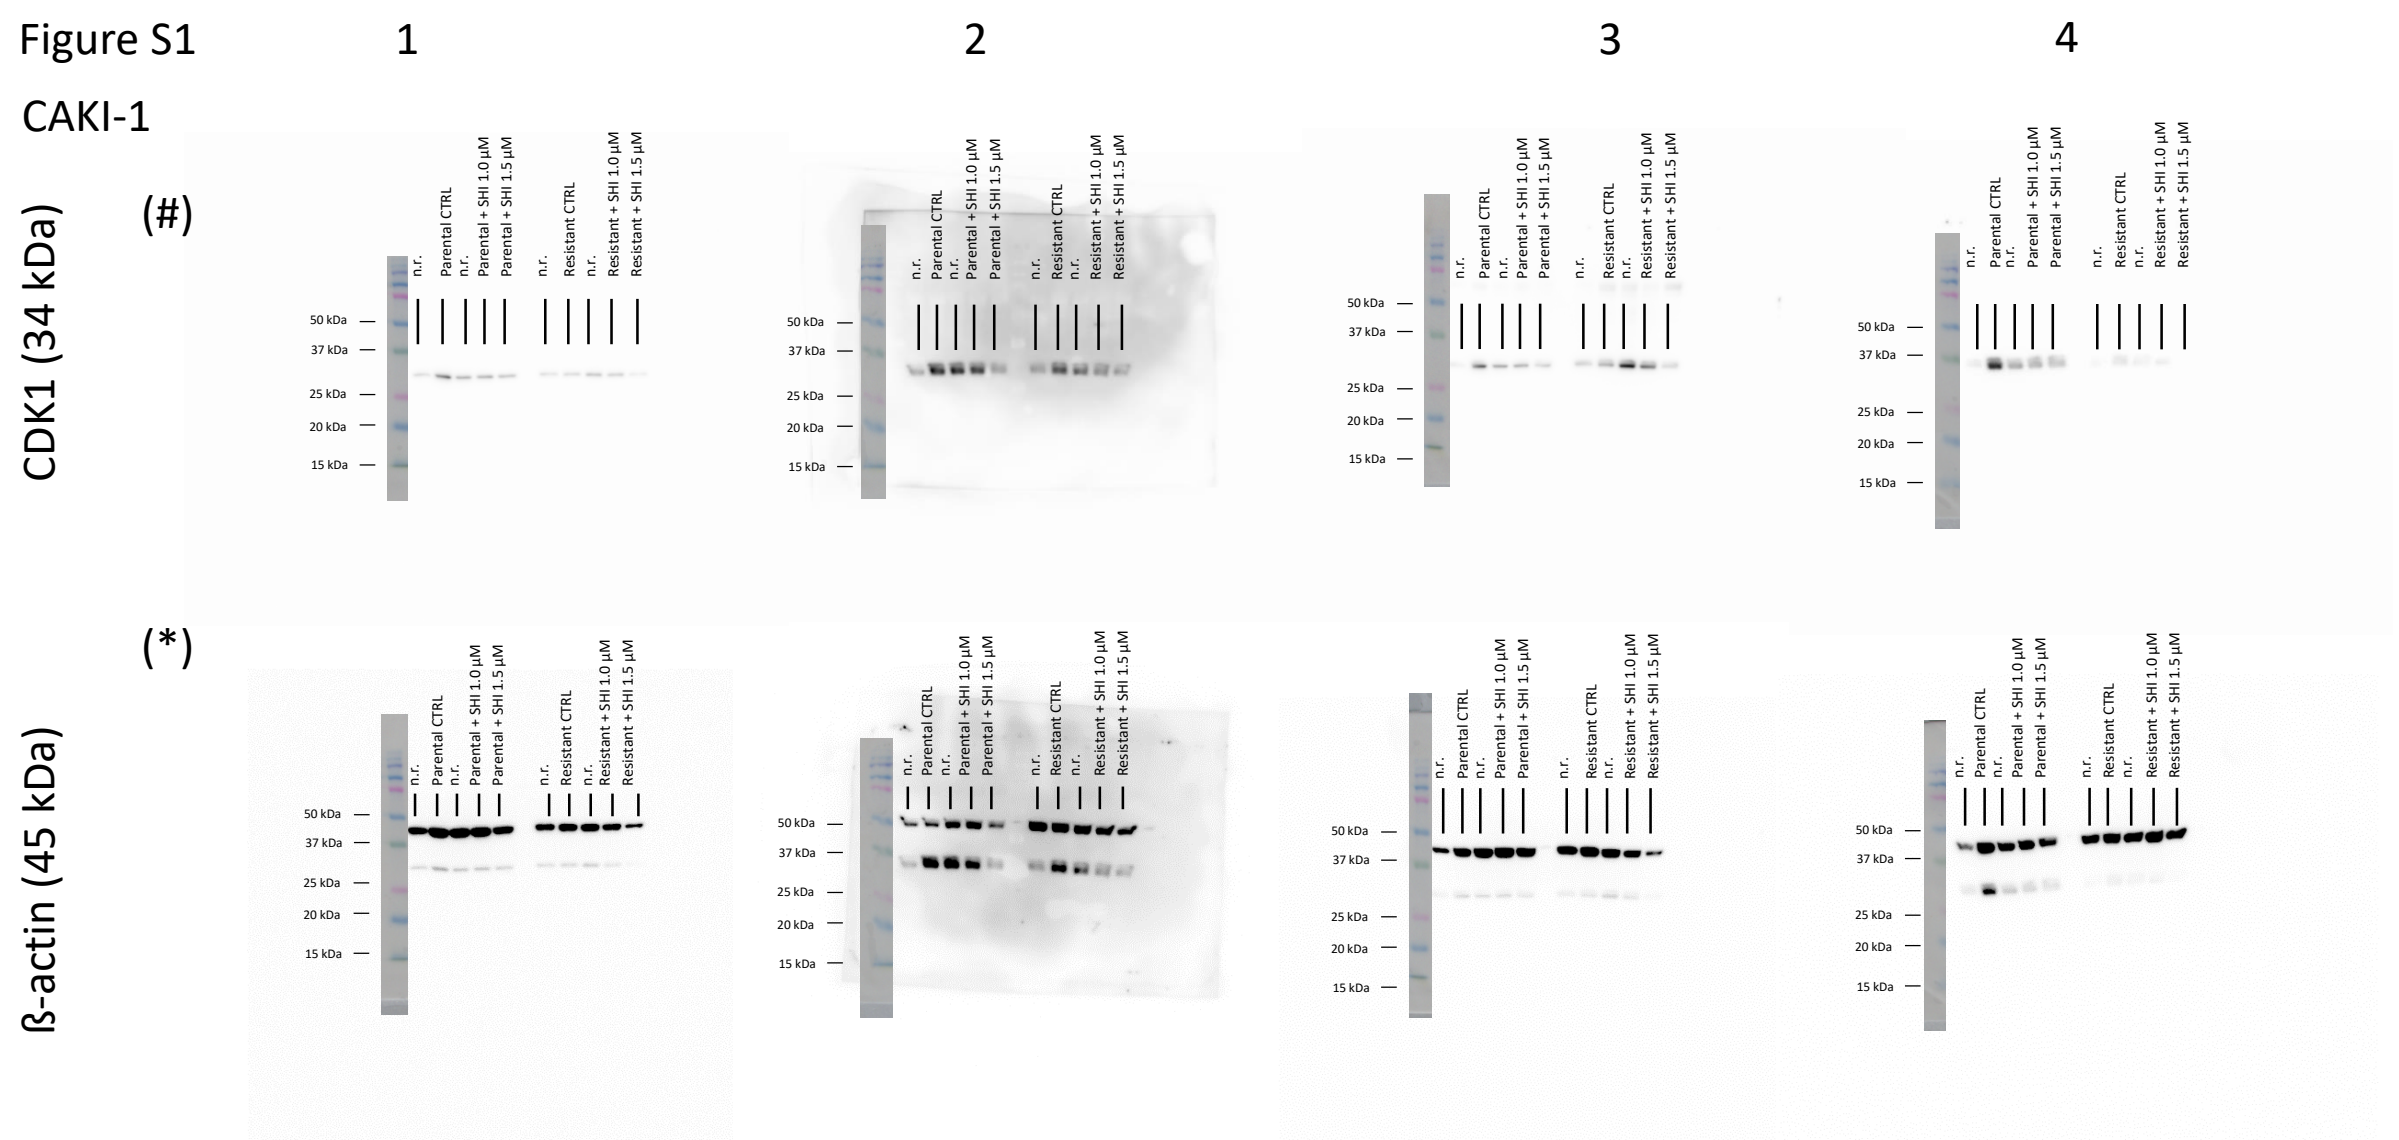

Figure S1e: Detailed information about Figure 4 - Protein expression and activity of cell cycle regulating proteins in parental and sunitinib-resistant Caki-1 cells after 48 h exposure to 1 or 1.5  $\mu$ M SHI. Protein expression of CDK1 (#), corresponding protein expression of  $\beta$ -actin (\*). n.r. = not relevant.



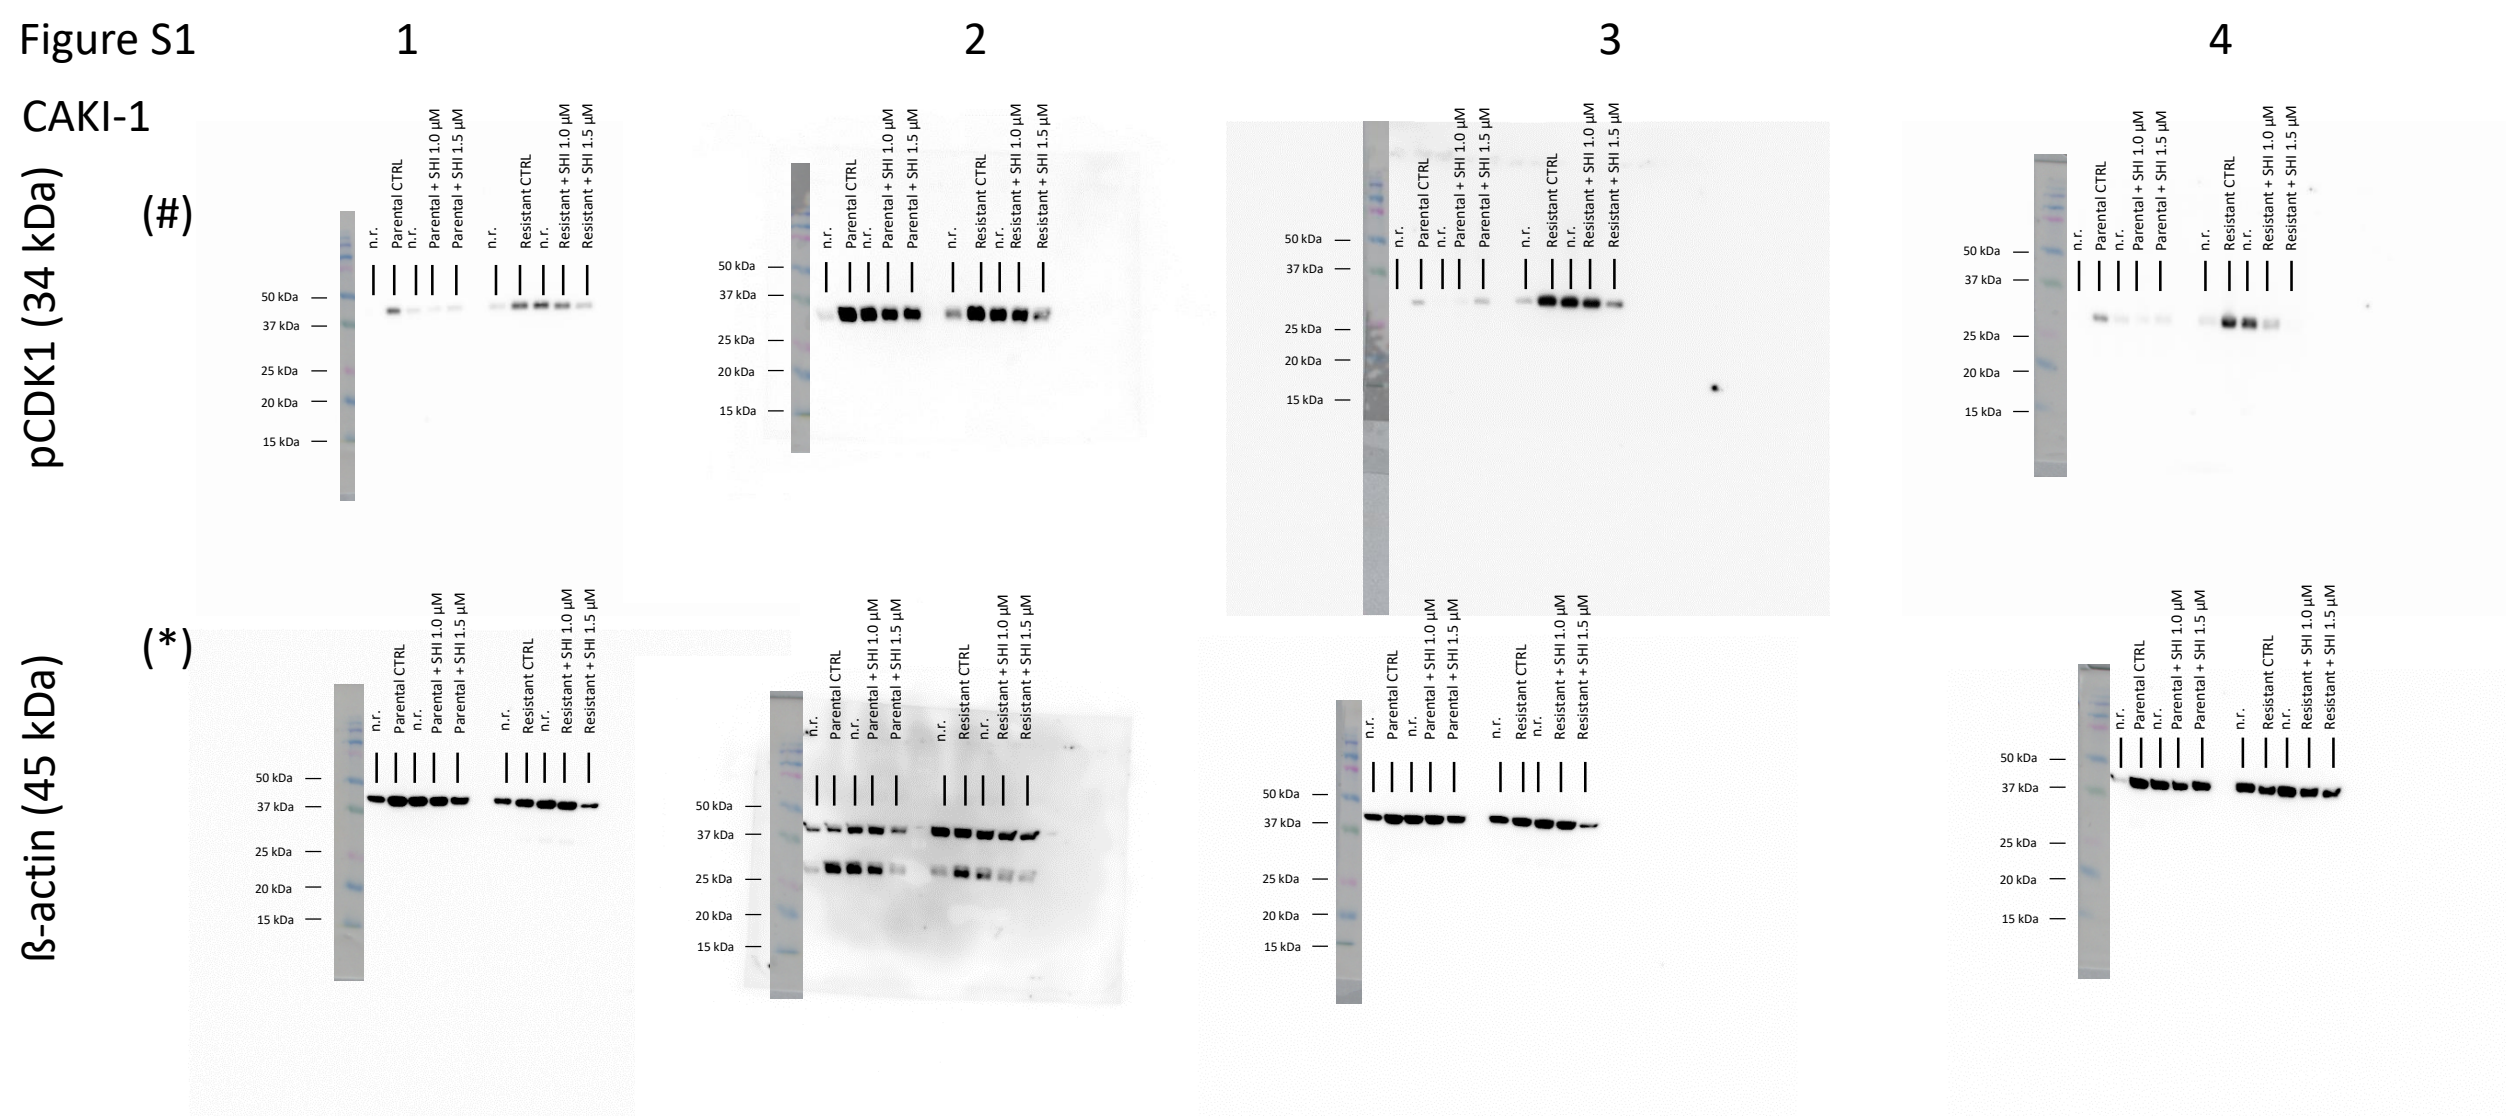

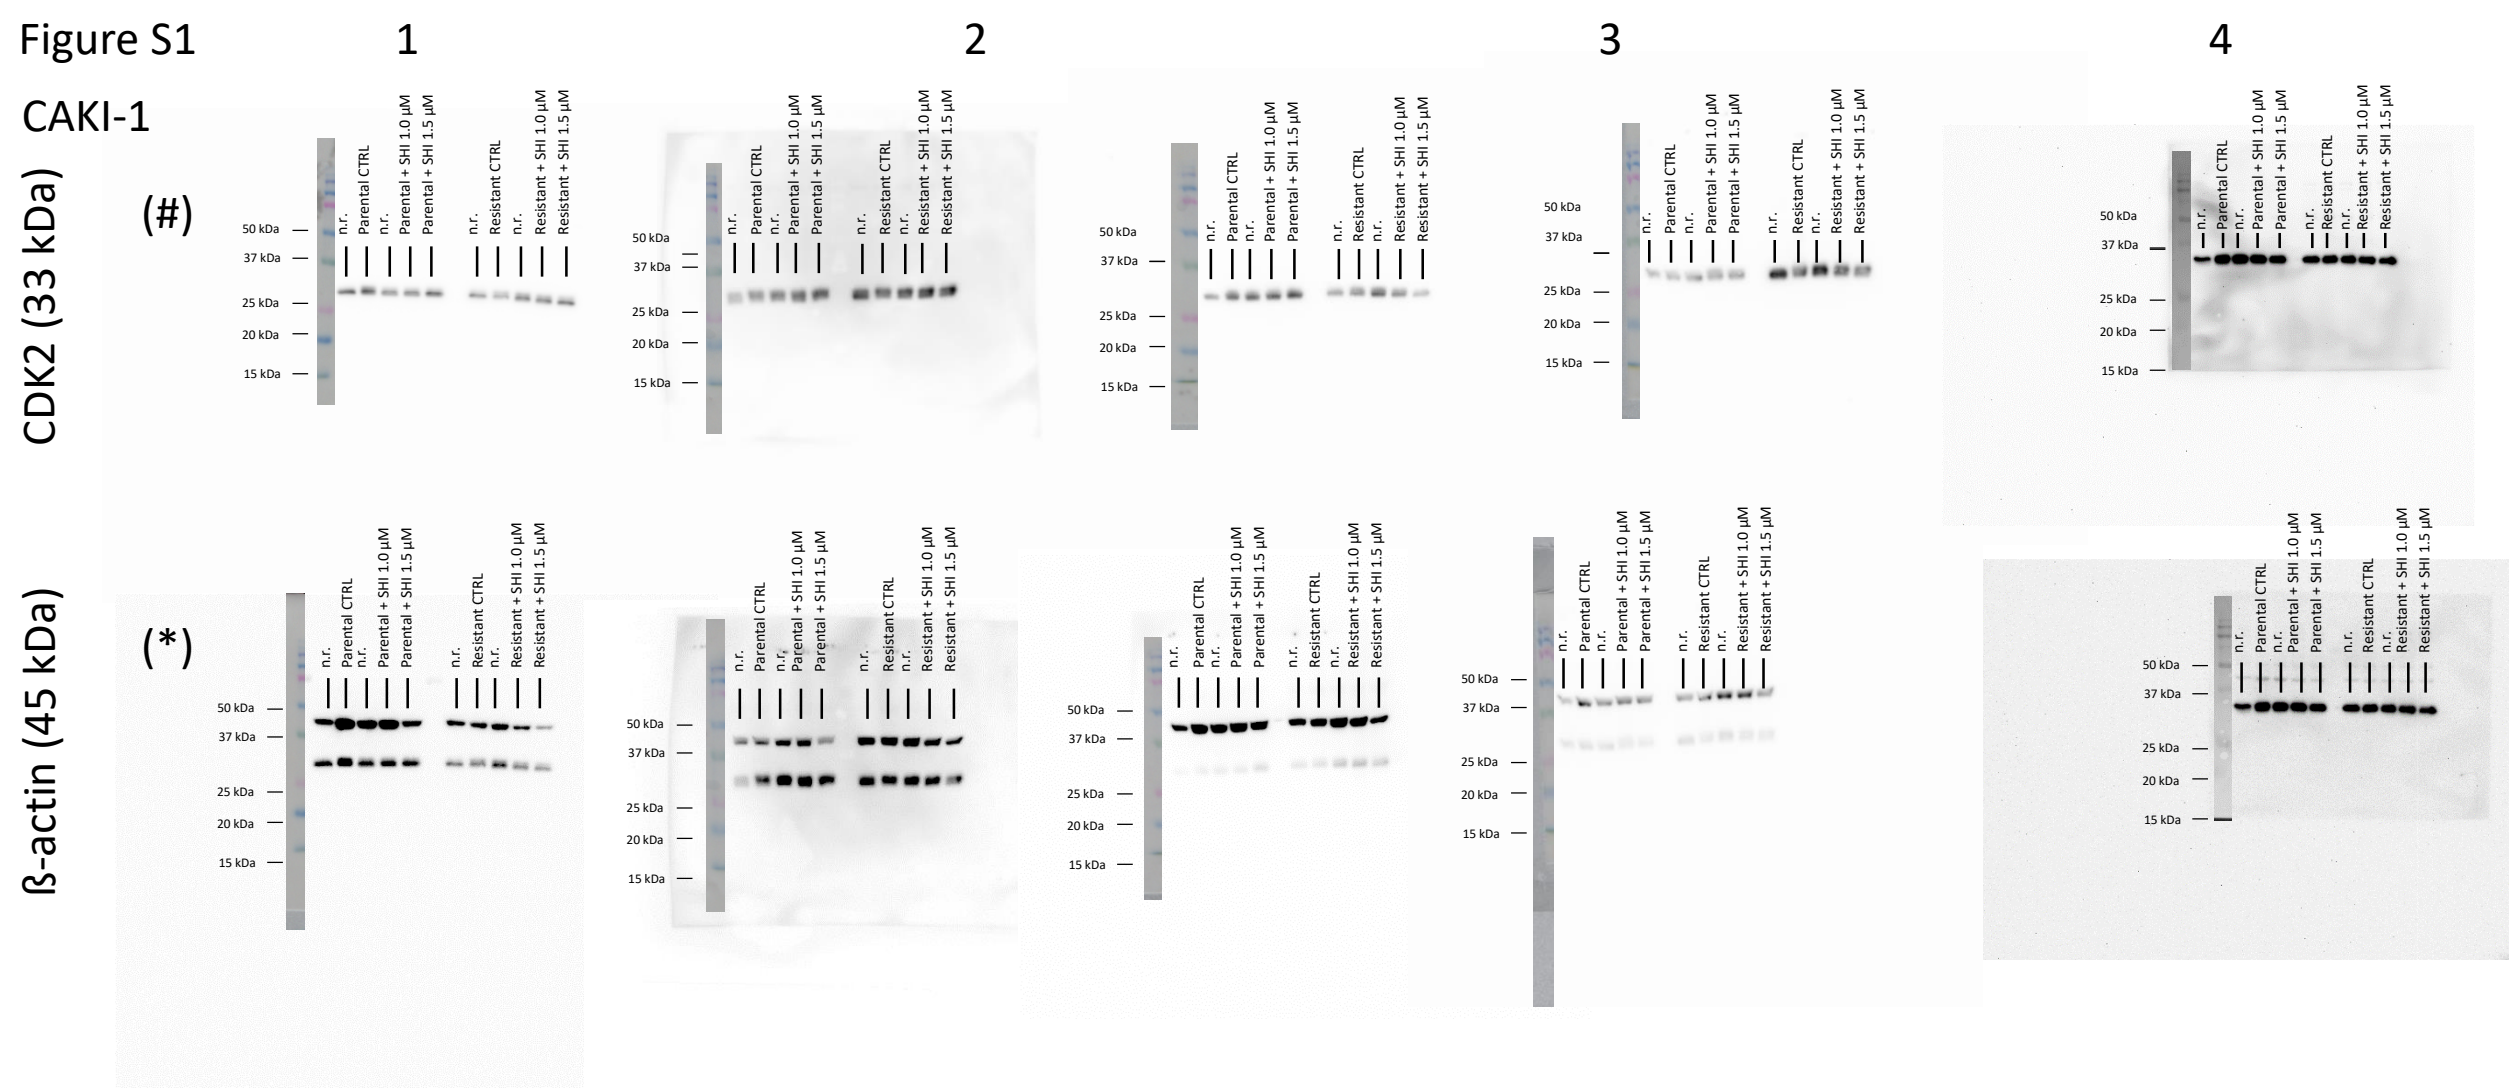

Figure S1g: Detailed information about Figure 4 - Protein expression and activity of cell cycle regulating proteins in parental and sunitinib-resistant Caki-1 cells after 48 h exposure to 1 or 1.5  $\mu$ M SHI. Protein expression of CDK2 (#), corresponding protein expression of  $\beta$ -actin (\*). n.r. = not relevant.



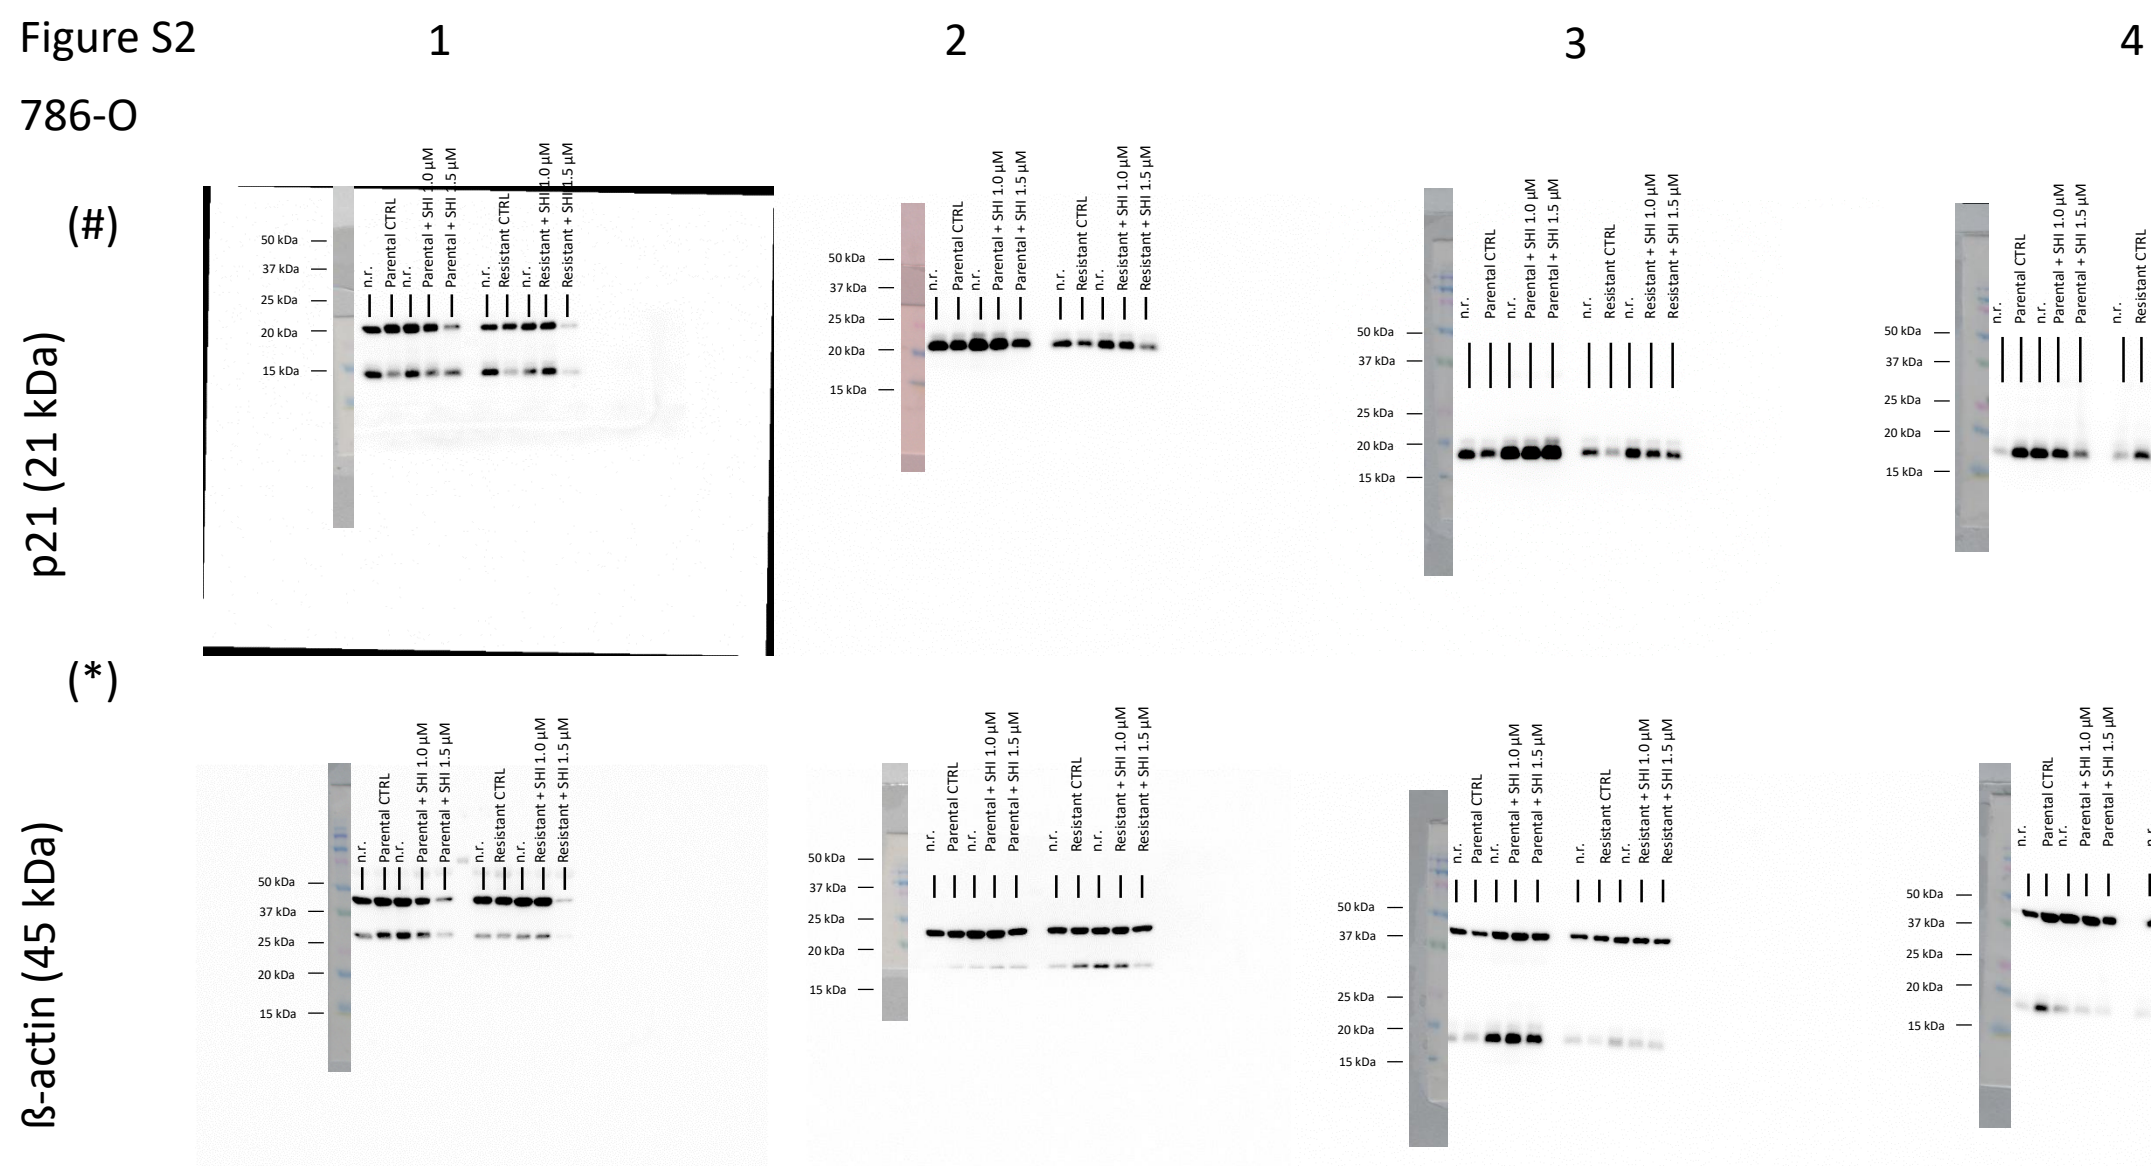

Figure S2a: Detailed information about Figure 5 - Protein expression and activity of cell cycle regulating proteins in parental and sunitinib-resistant 786-O cells after 48 h exposure to 1 or 1.5  $\mu$ M SHI. Protein expression of p21 (#), corresponding protein expression of  $\beta$ -actin (\*). n.r. = not relevant.

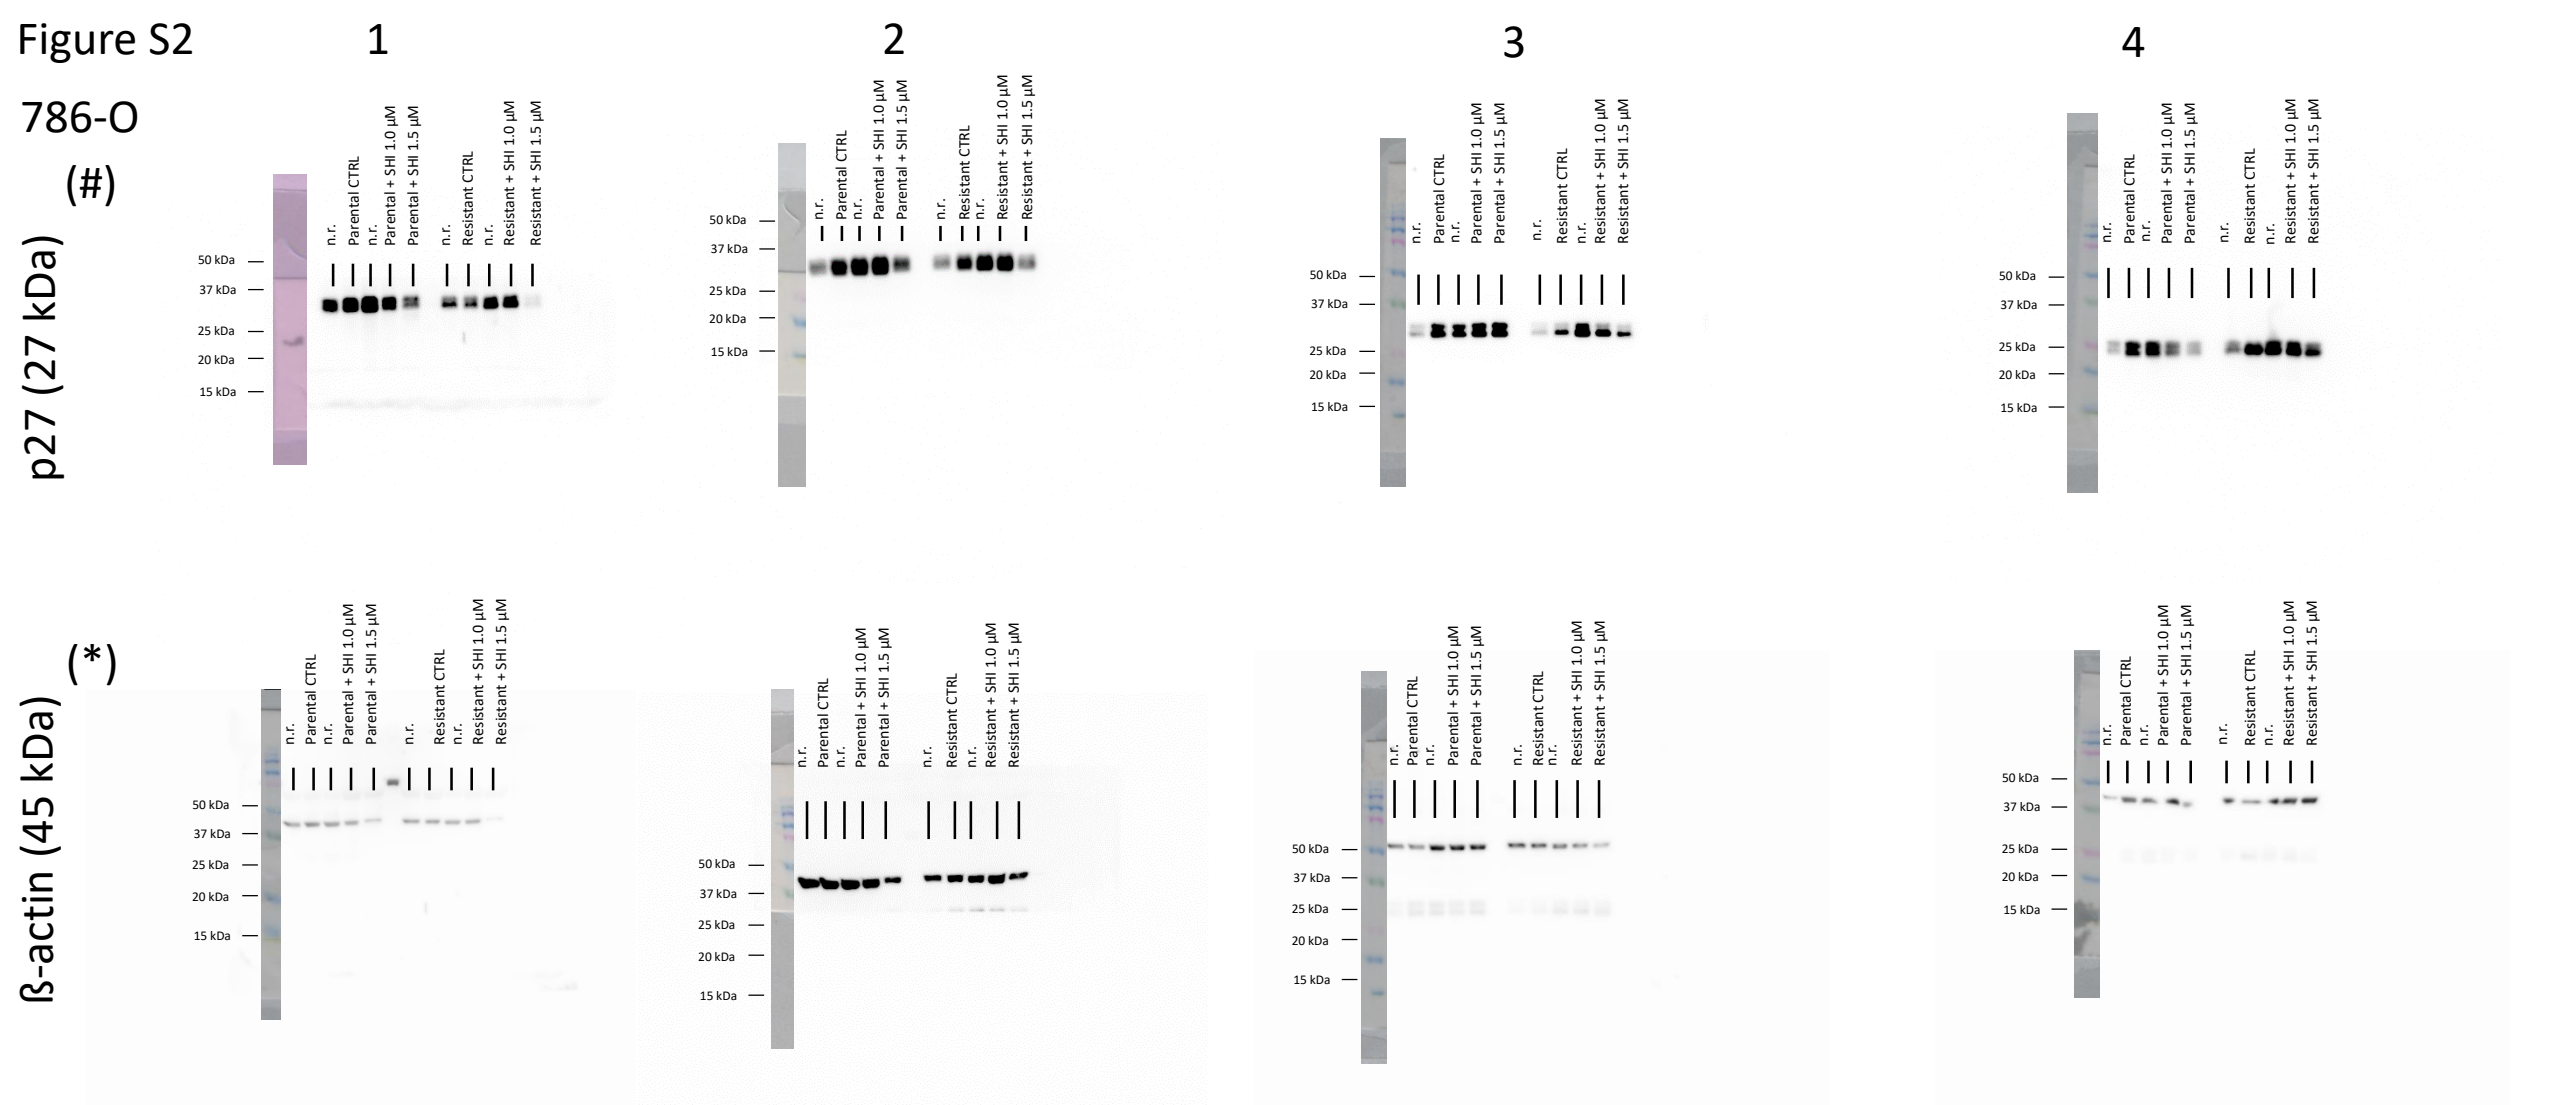

**Figure S2b: Detailed information about Figure 5 - Protein expression and activity of cell cycle regulating proteins in parental and sunitinib-resistant 786-O cells after 48 h exposure to 1 or 1.5  $\mu$ M SHI. Protein expression of p27 (#), corresponding protein expression of  $\beta$ -actin (\*). n.r. = not relevant.**



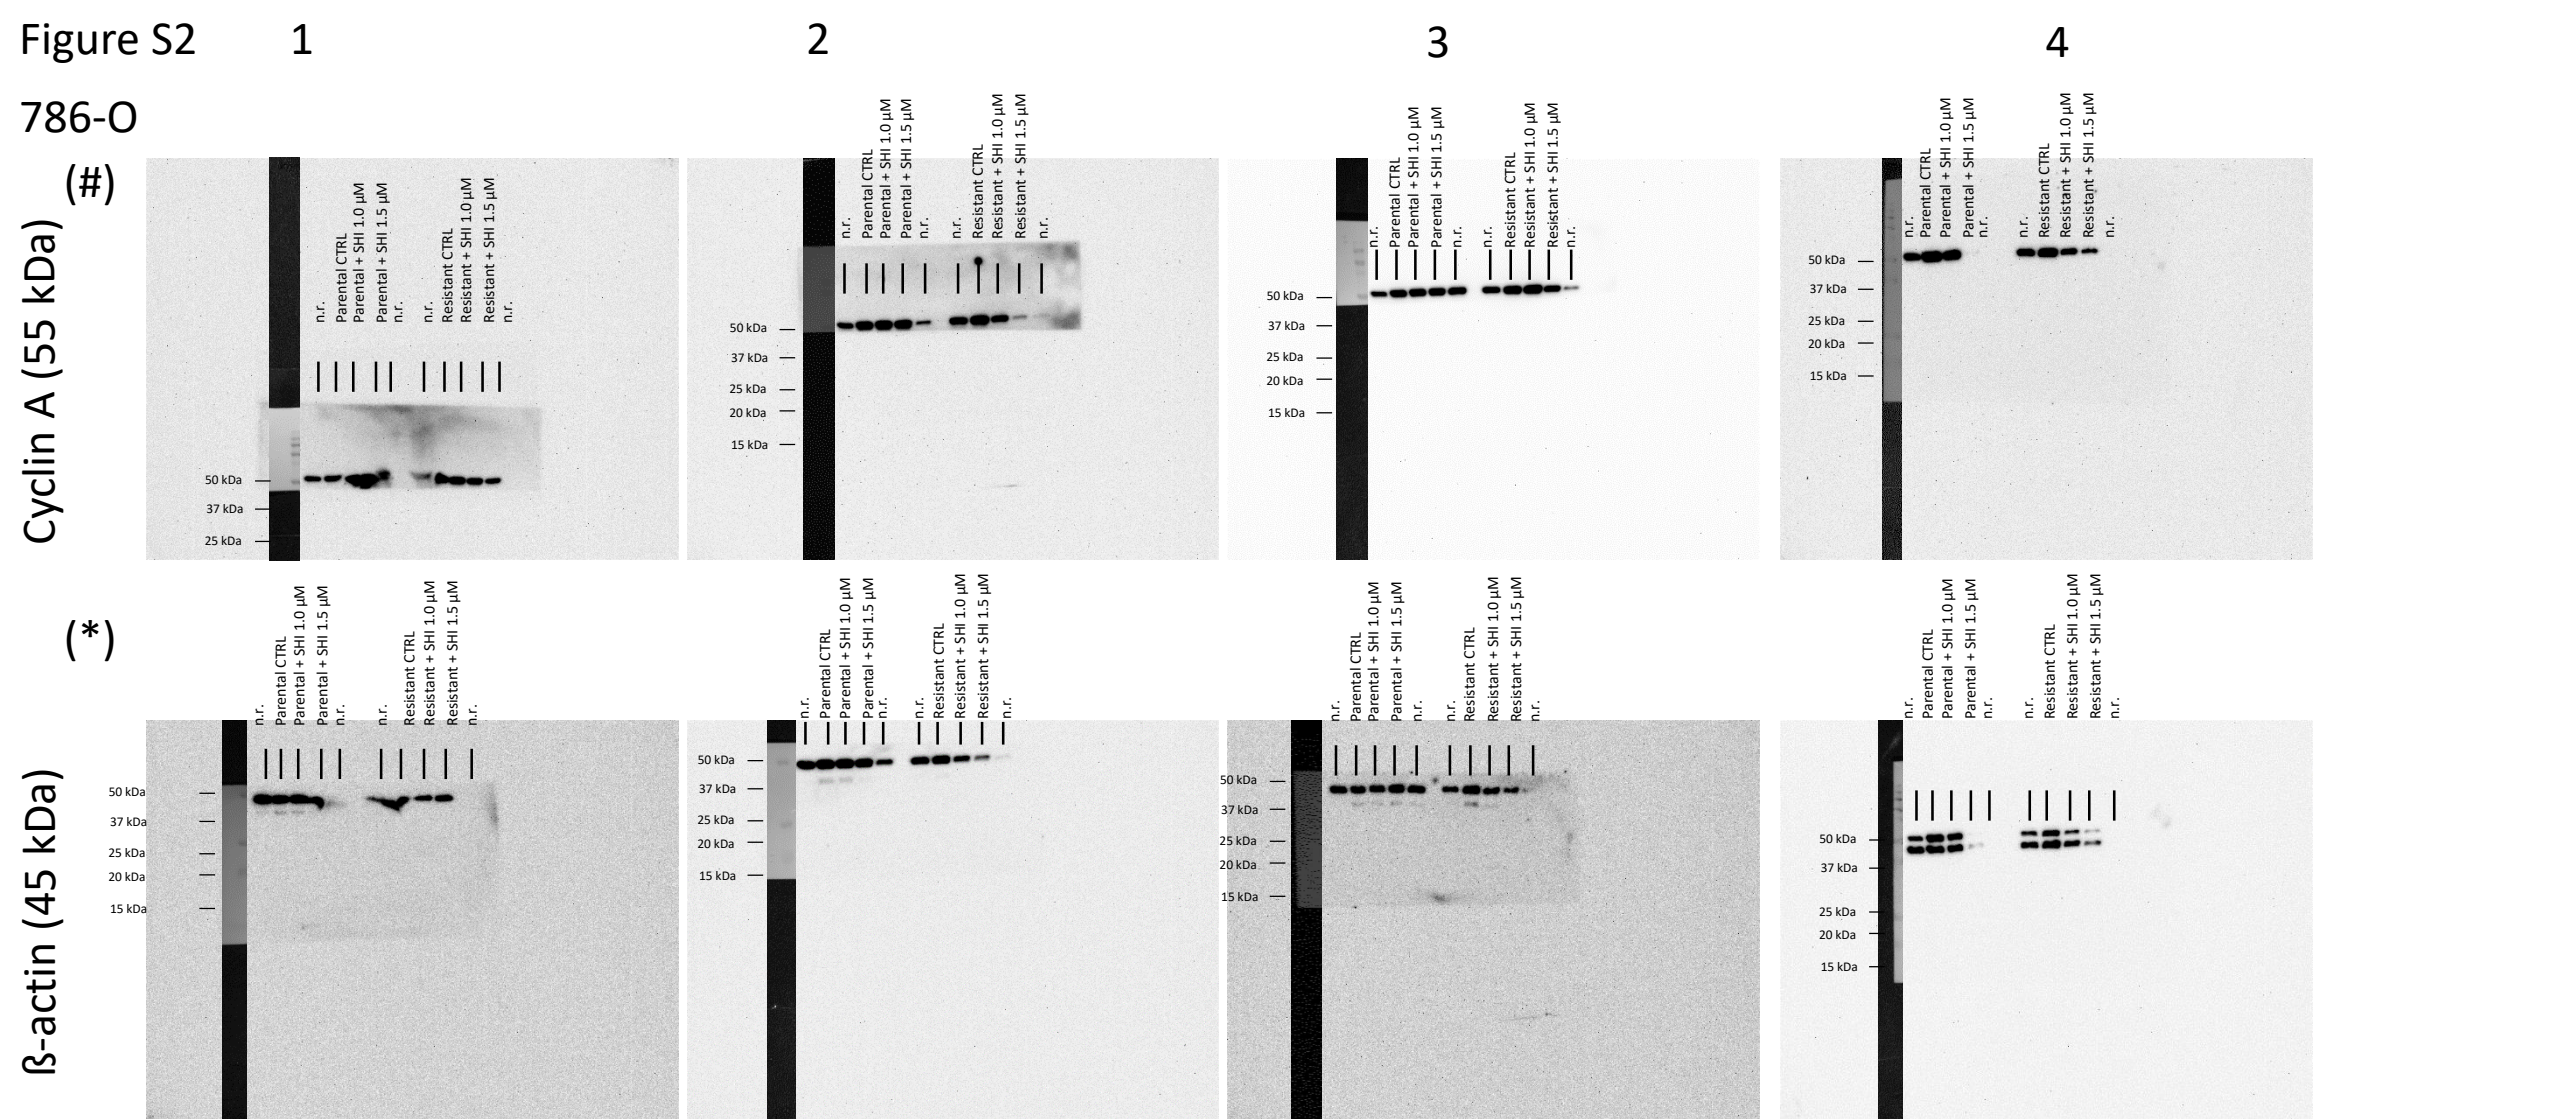

Figure S2c: Detailed information about Figure 5 - Protein expression and activity of cell cycle regulating proteins in parental and sunitinib-resistant 786-O cells after 48 h exposure to 1 or 1.5  $\mu$ M SHI. Protein expression of Cyclin A (#), corresponding protein expression of  $\beta$ -actin (\*). n.r. = not relevant.



Figure S2

786-O

(#)

Cyclin A (55 kDa)

(\*)

$\beta$ -actin (45 kDa)

5

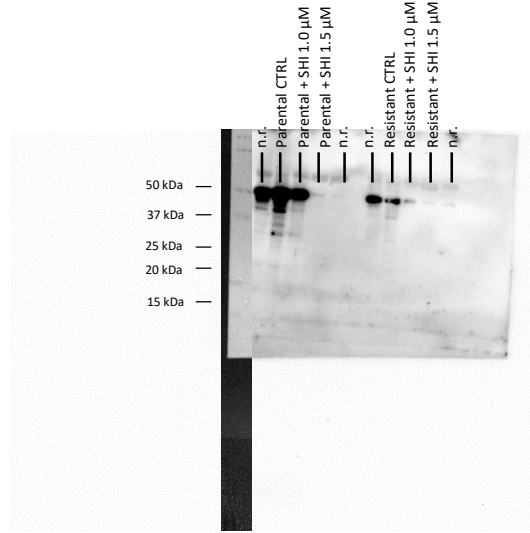

6

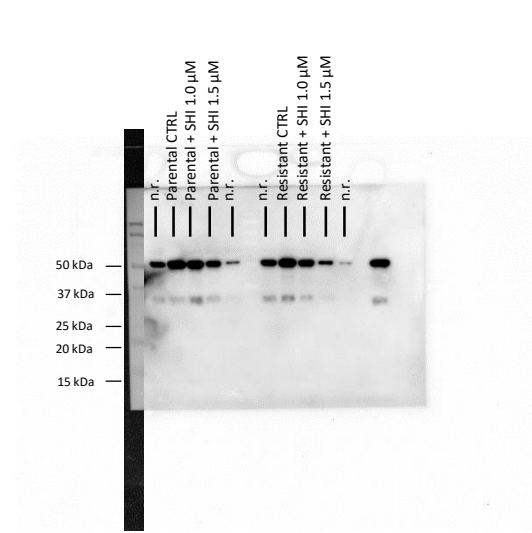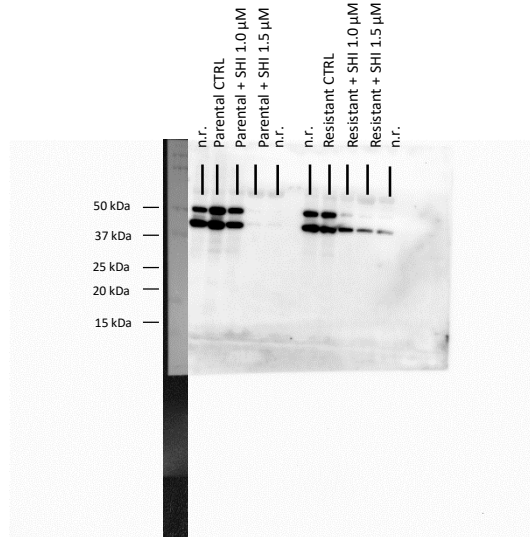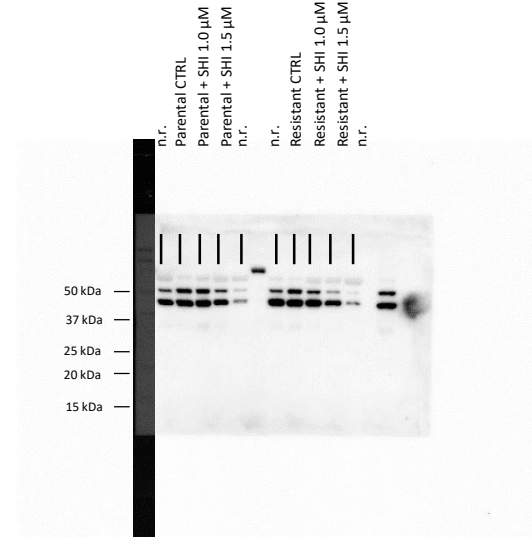

Figure S2c: Detailed information about Figure 5 - Protein expression and activity of cell cycle regulating proteins in parental and sunitinib-resistant 786-O cells after 48 h exposure to 1 or 1.5  $\mu$ M SHI. Protein expression of Cyclin A (#), corresponding protein expression of  $\beta$ -actin (\*). n.r. = not relevant.

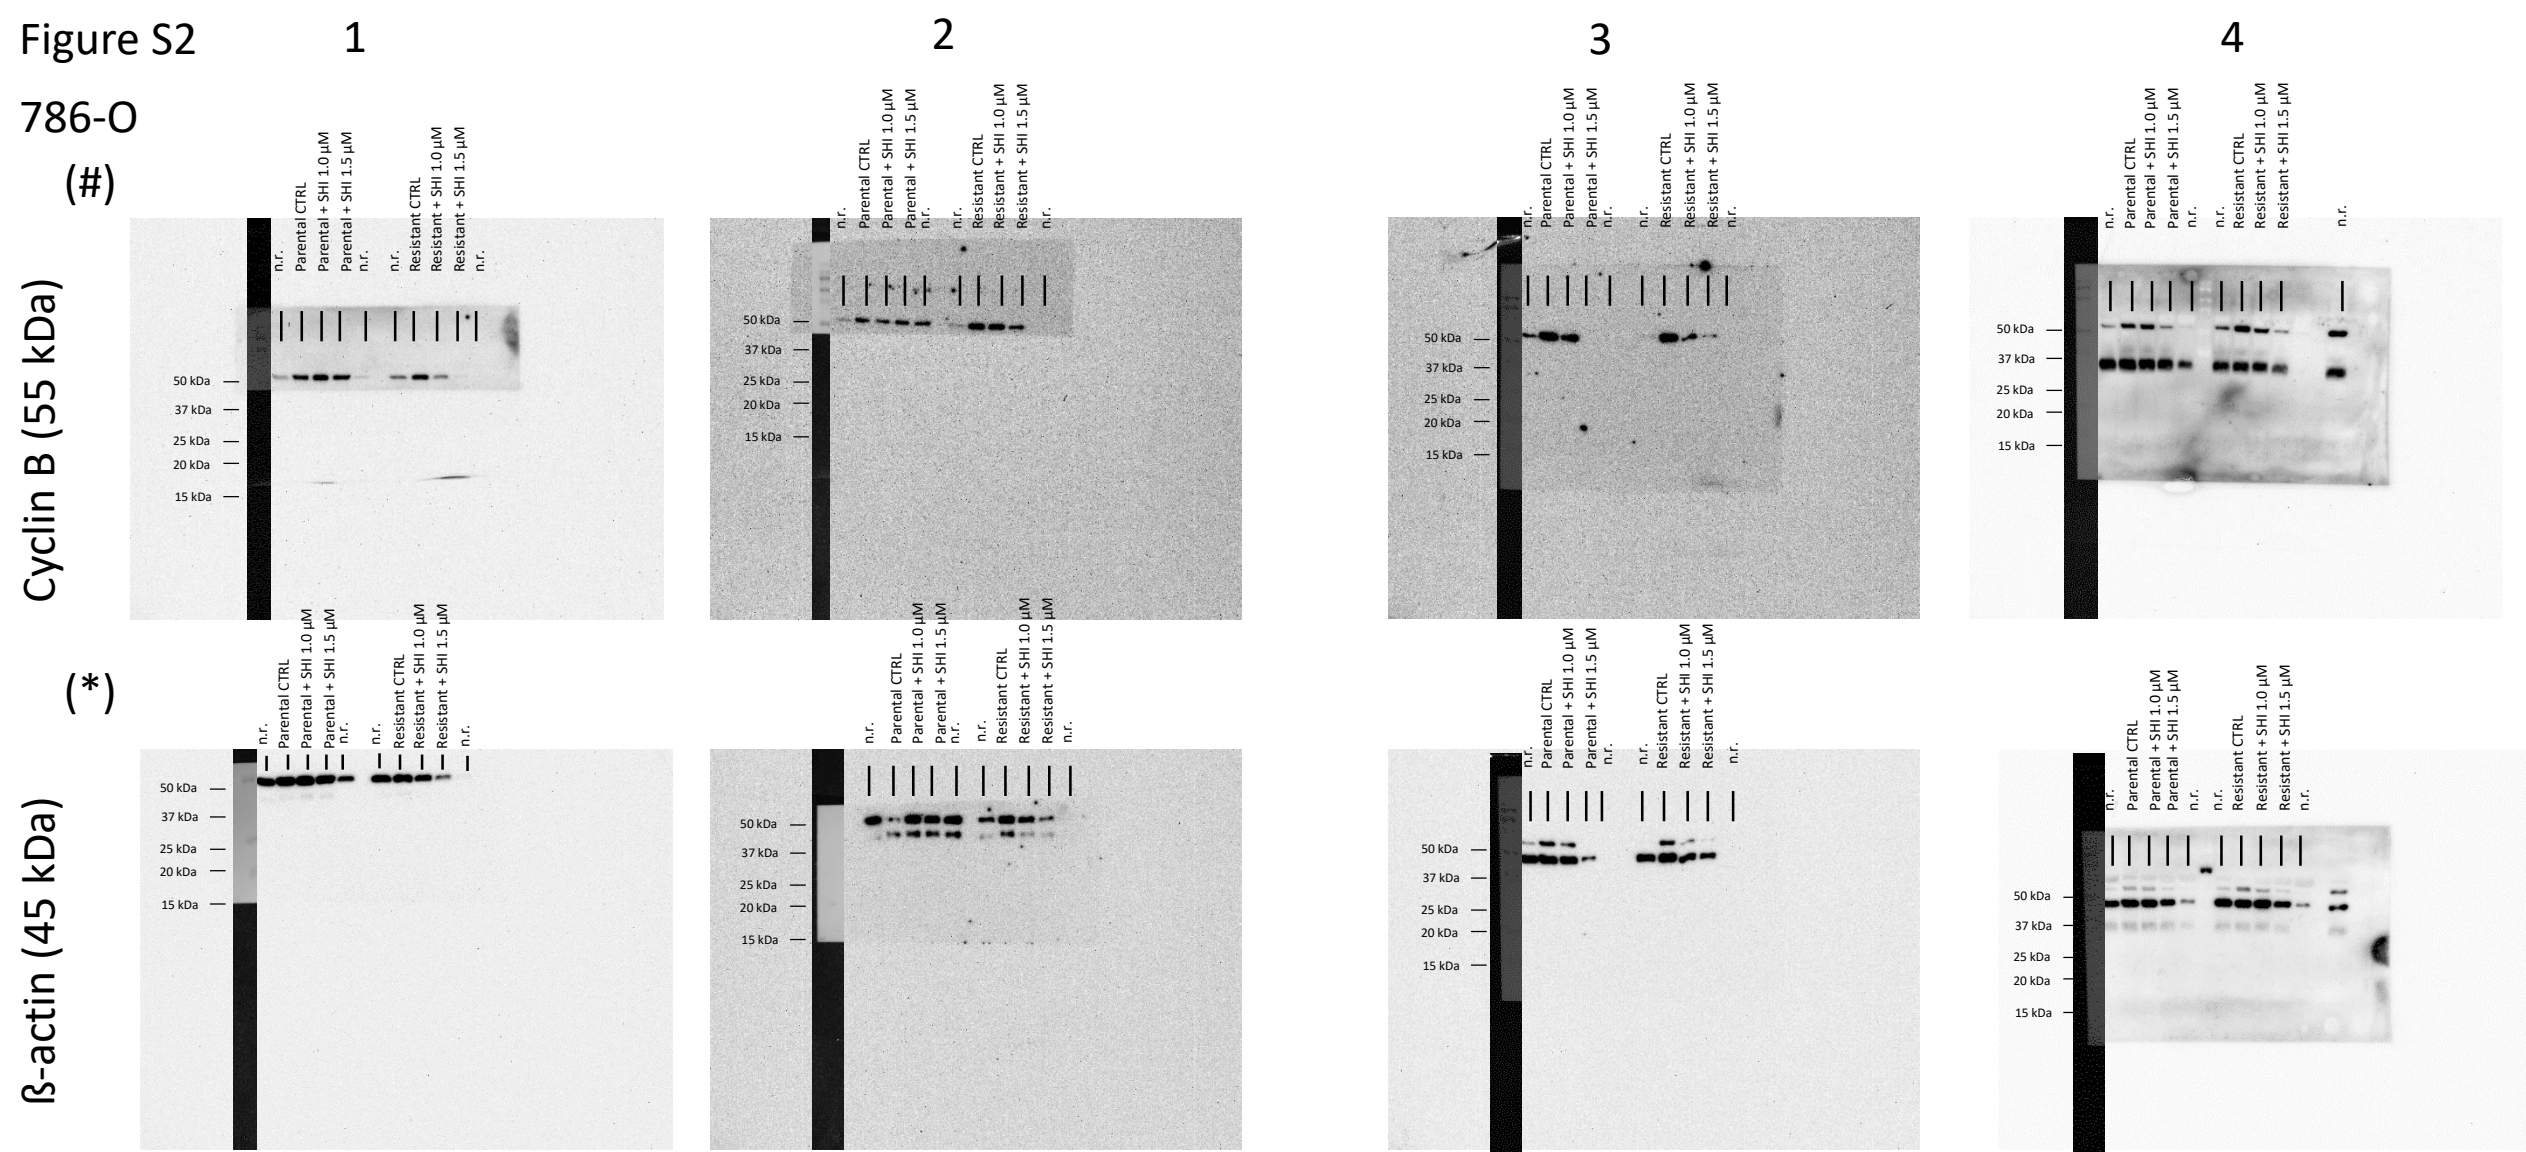

Figure S2d: Detailed information about Figure 5 - Protein expression and activity of cell cycle regulating proteins in parental and sunitinib-resistant 786-O cells after 48 h exposure to 1 or 1.5  $\mu$ M SHI. Protein expression of Cyclin B (#), corresponding protein expression of  $\beta$ -actin (\*). n.r. = not relevant.

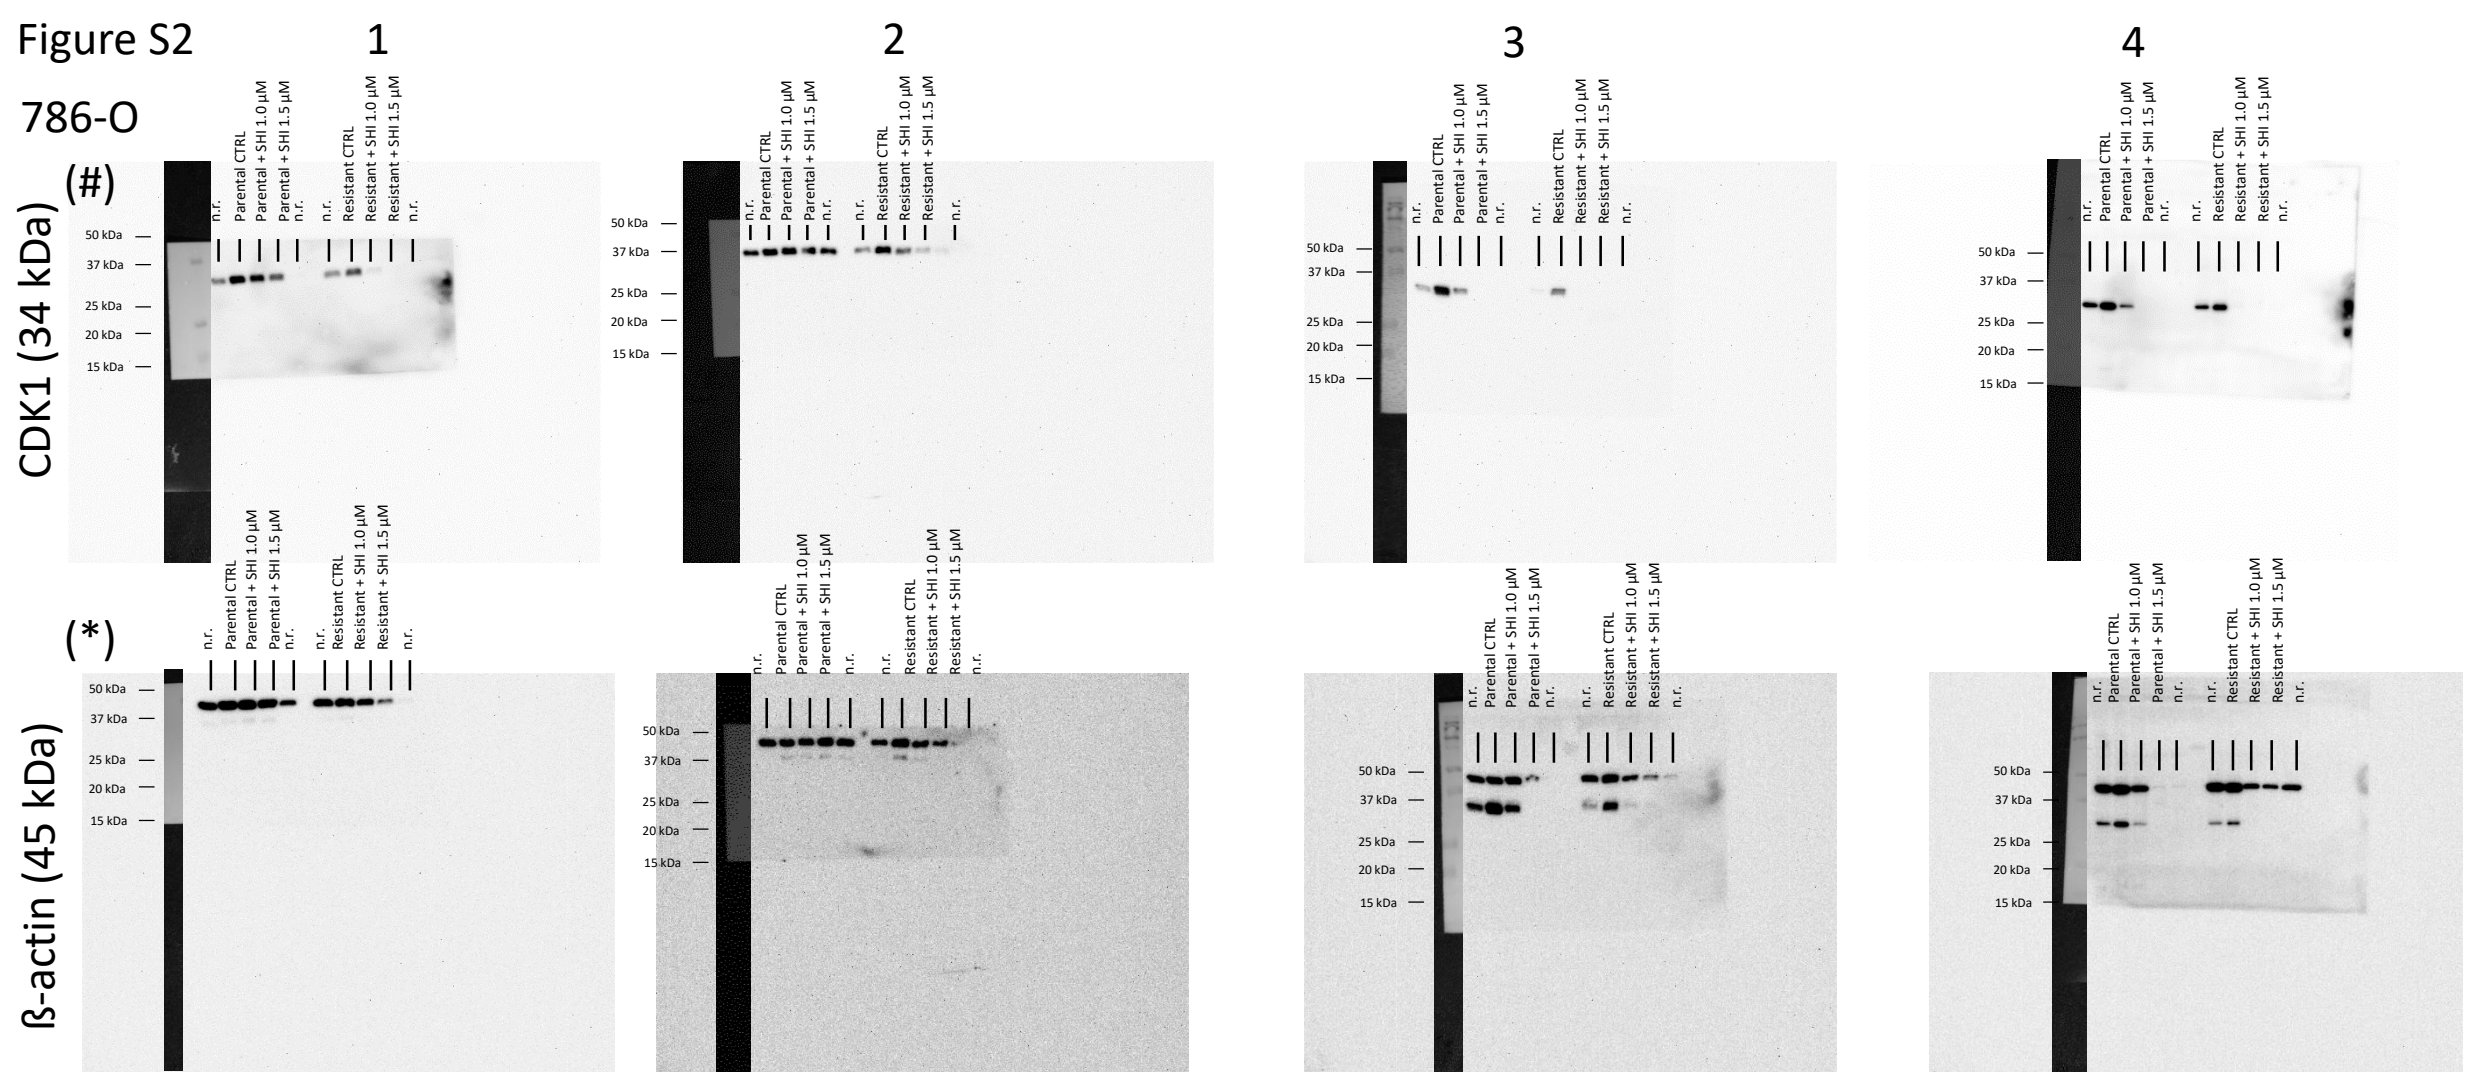

**Figure S2e:** Detailed information about Figure 5 - Protein expression and activity of cell cycle regulating proteins in parental and sunitinib-resistant 786-O cells after 48 h exposure to 1 or 1.5  $\mu$ M SHI. Protein expression of CDK1 (#), corresponding protein expression of  $\beta$ -actin (\*). n.r. = not relevant.



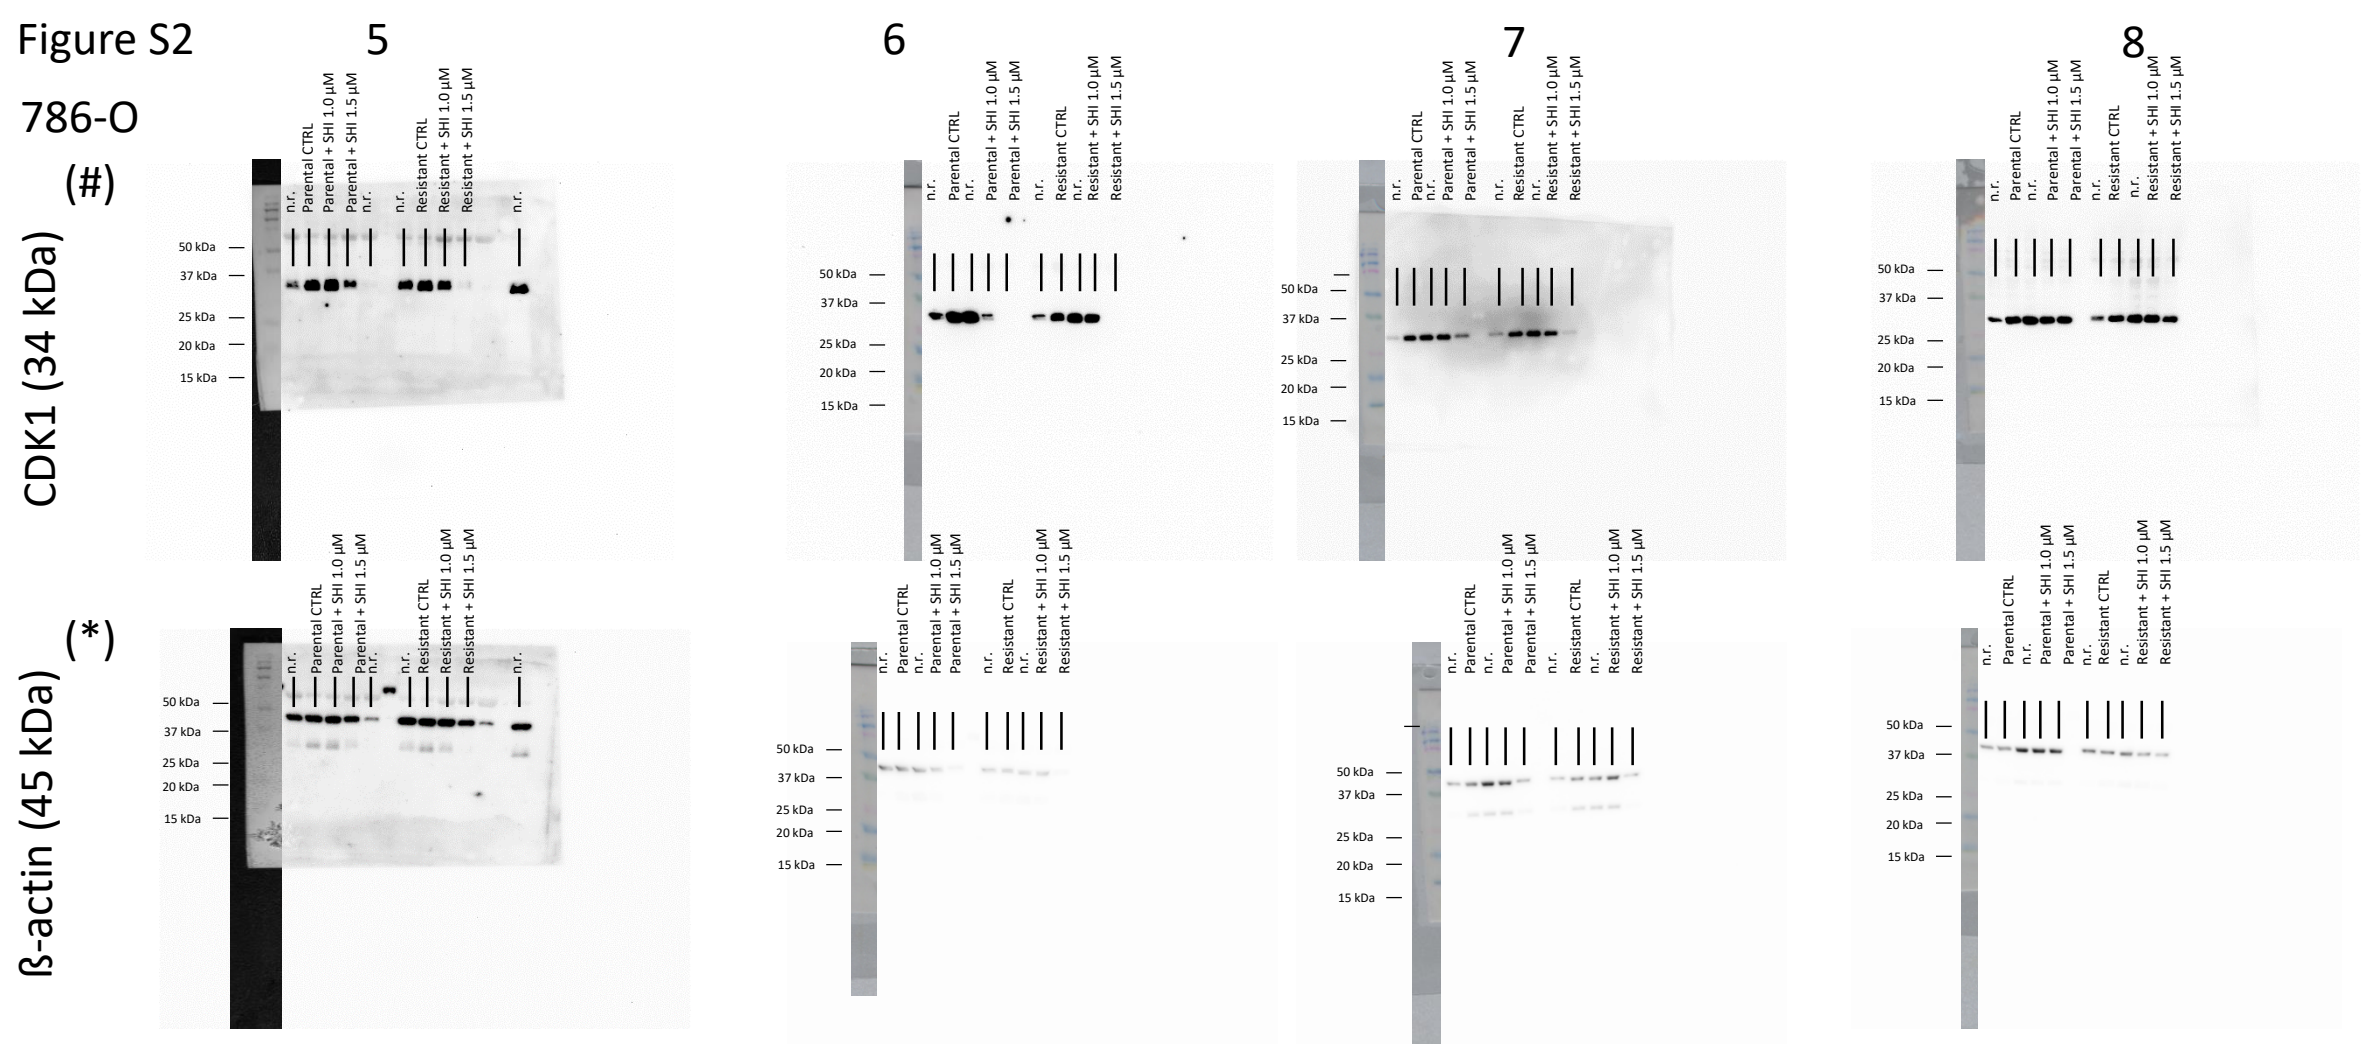

**Figure S2e: Detailed information about Figure 5 - Protein expression and activity of cell cycle regulating proteins in parental and sunitinib-resistant 786-O cells after 48 h exposure to 1 or 1.5  $\mu$ M SHI. Protein expression of CDK1 (#), corresponding protein expression of  $\beta$ -actin (\*). n.r. = not relevant.**

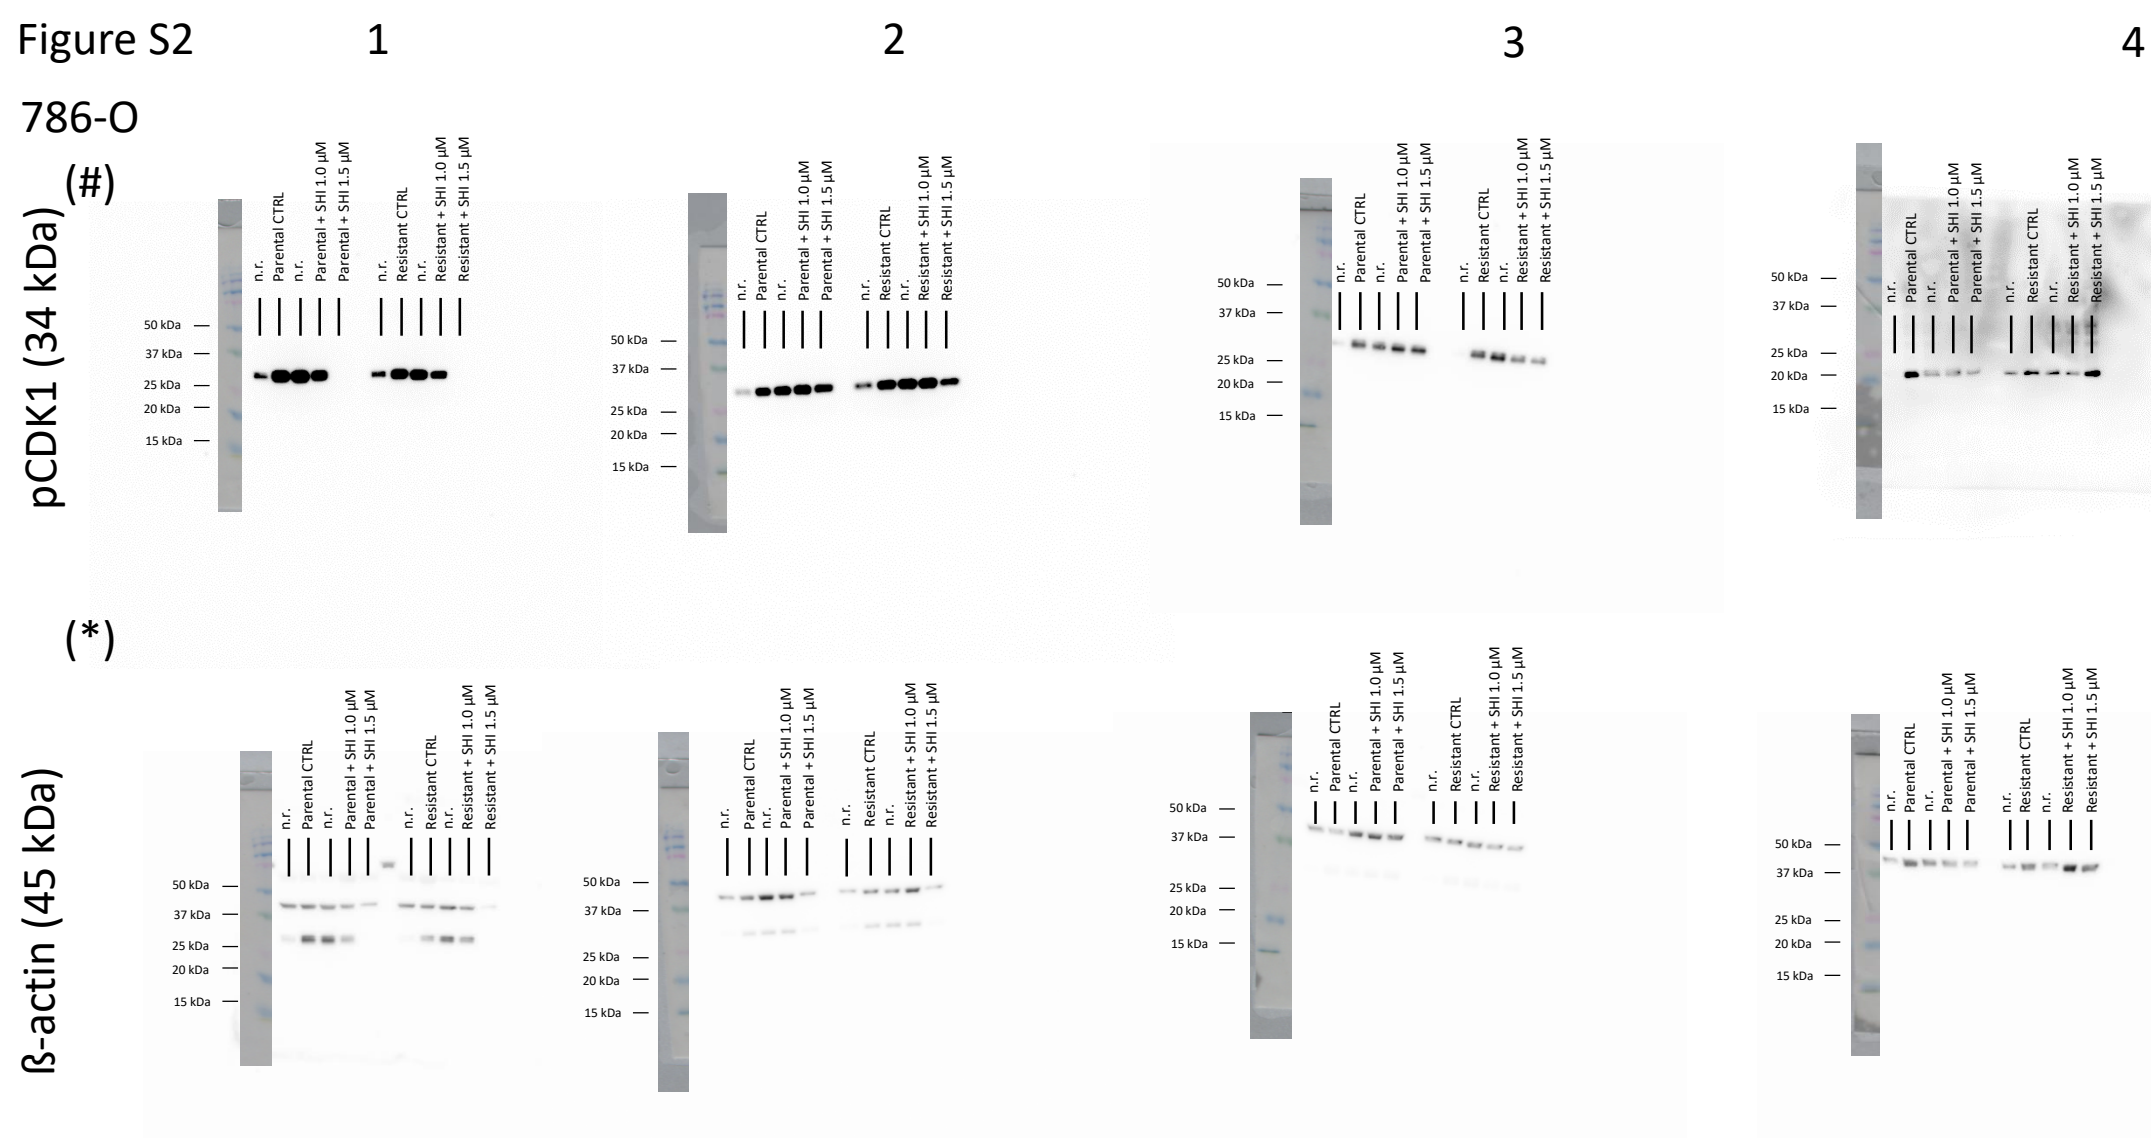

Figure S2f: Detailed information about Figure 5 - Protein expression and activity of cell cycle regulating proteins in parental and sunitinib-resistant 786-O cells after 48 h exposure to 1 or 1.5  $\mu$ M SHI. Protein expression of pCDK1 (#), corresponding protein expression of  $\beta$ -actin (\*). n.r. = not relevant.

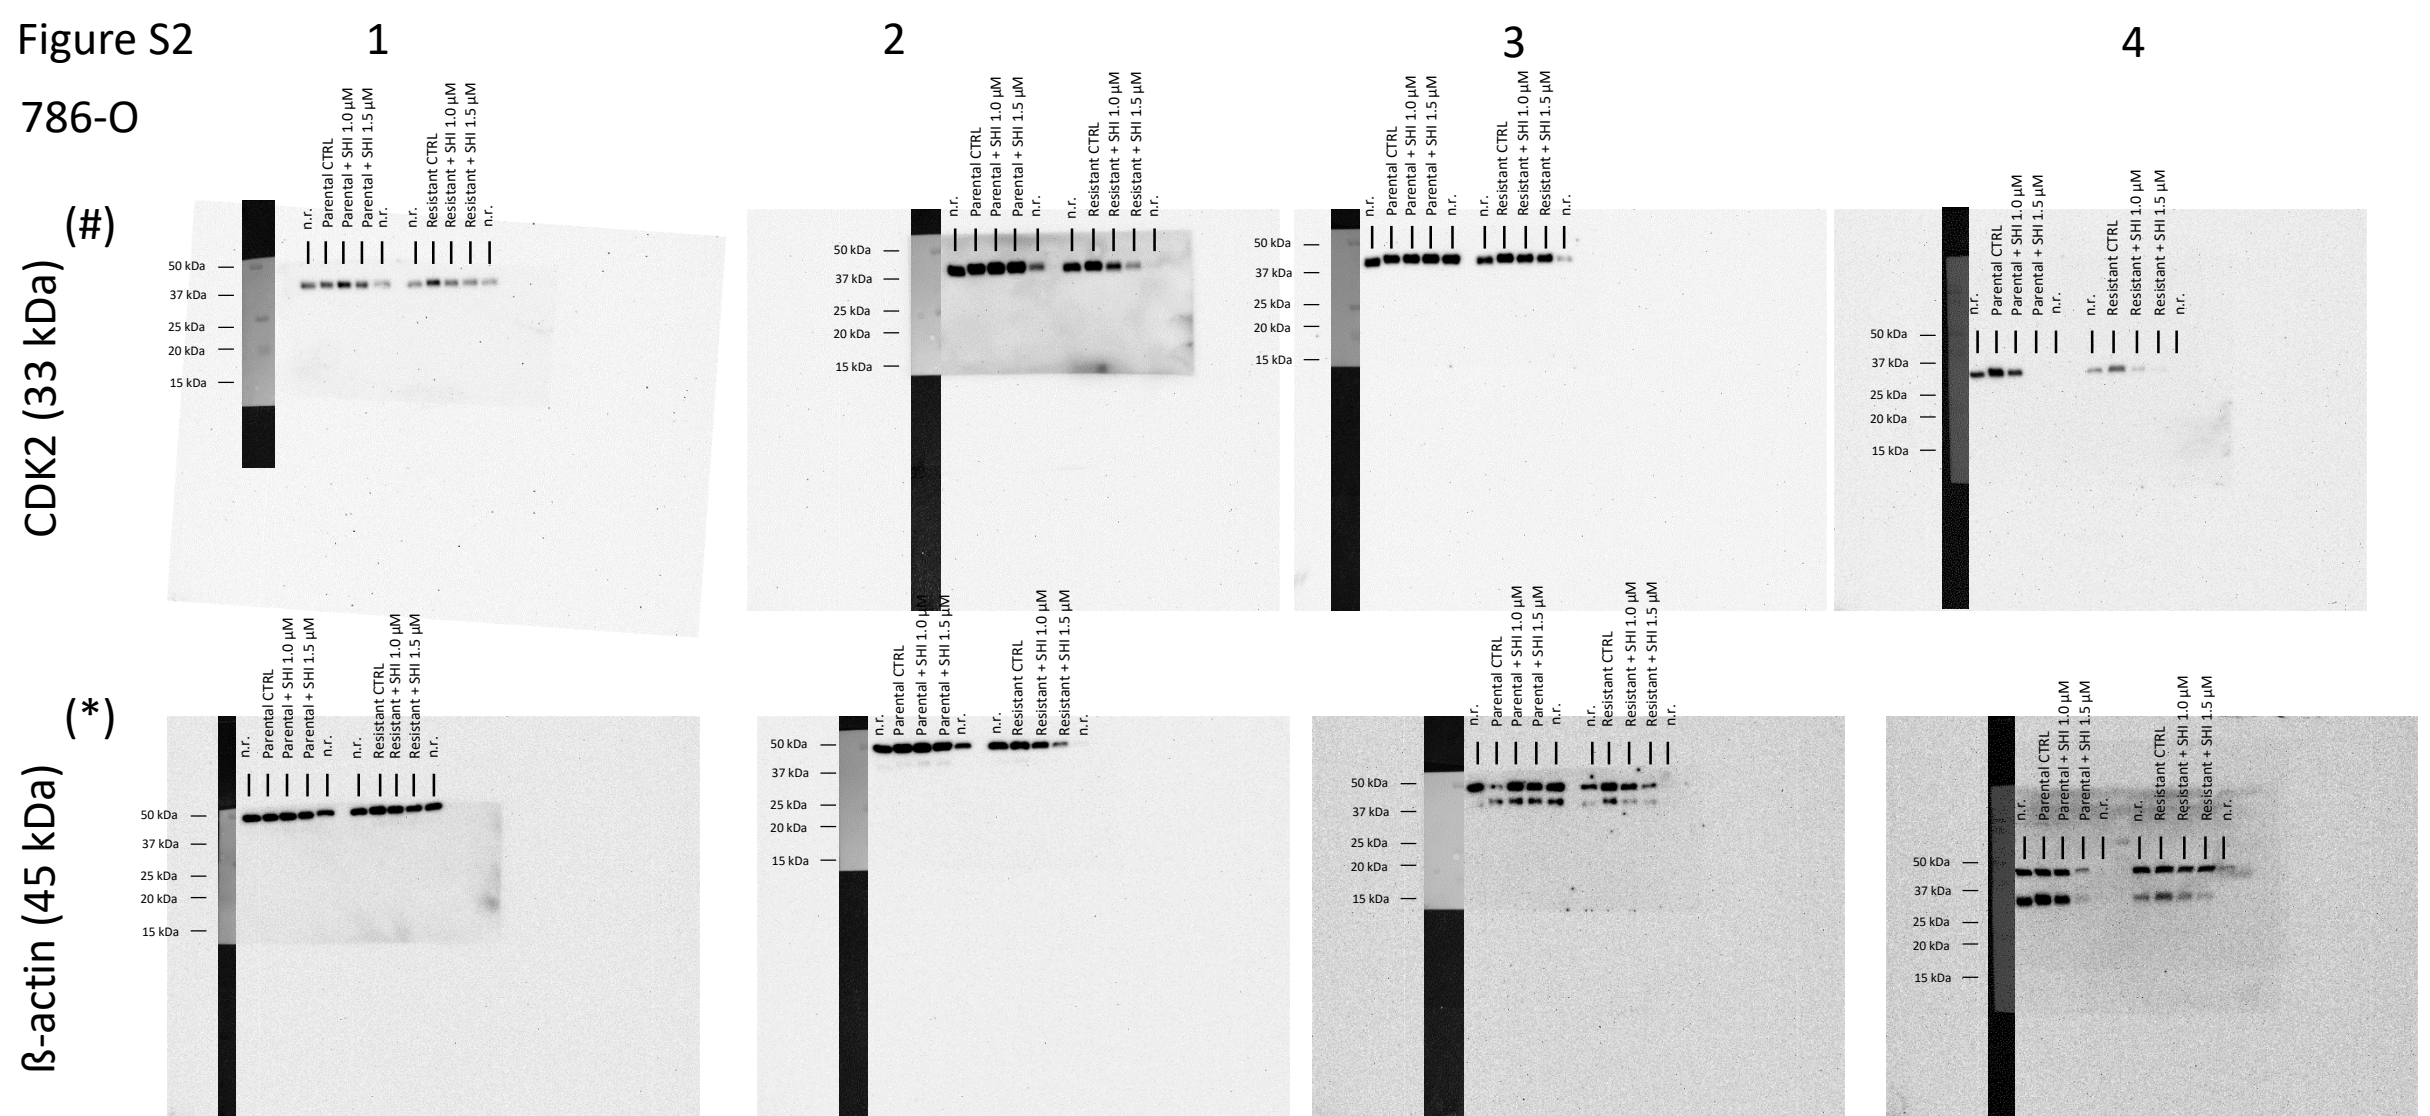

Figure S2g: Detailed information about Figure 5 - Protein expression and activity of cell cycle regulating proteins in parental and sunitinib-resistant 786-O cells after 48 h exposure to 1 or 1.5  $\mu$ M SHI. Protein expression of CDK2 (#), corresponding protein expression of  $\beta$ -actin (\*). n.r. = not relevant.



Figure S2

786-O

(#)

CDK2 (33 kDa)

(\*)

$\beta$ -actin (45 kDa)

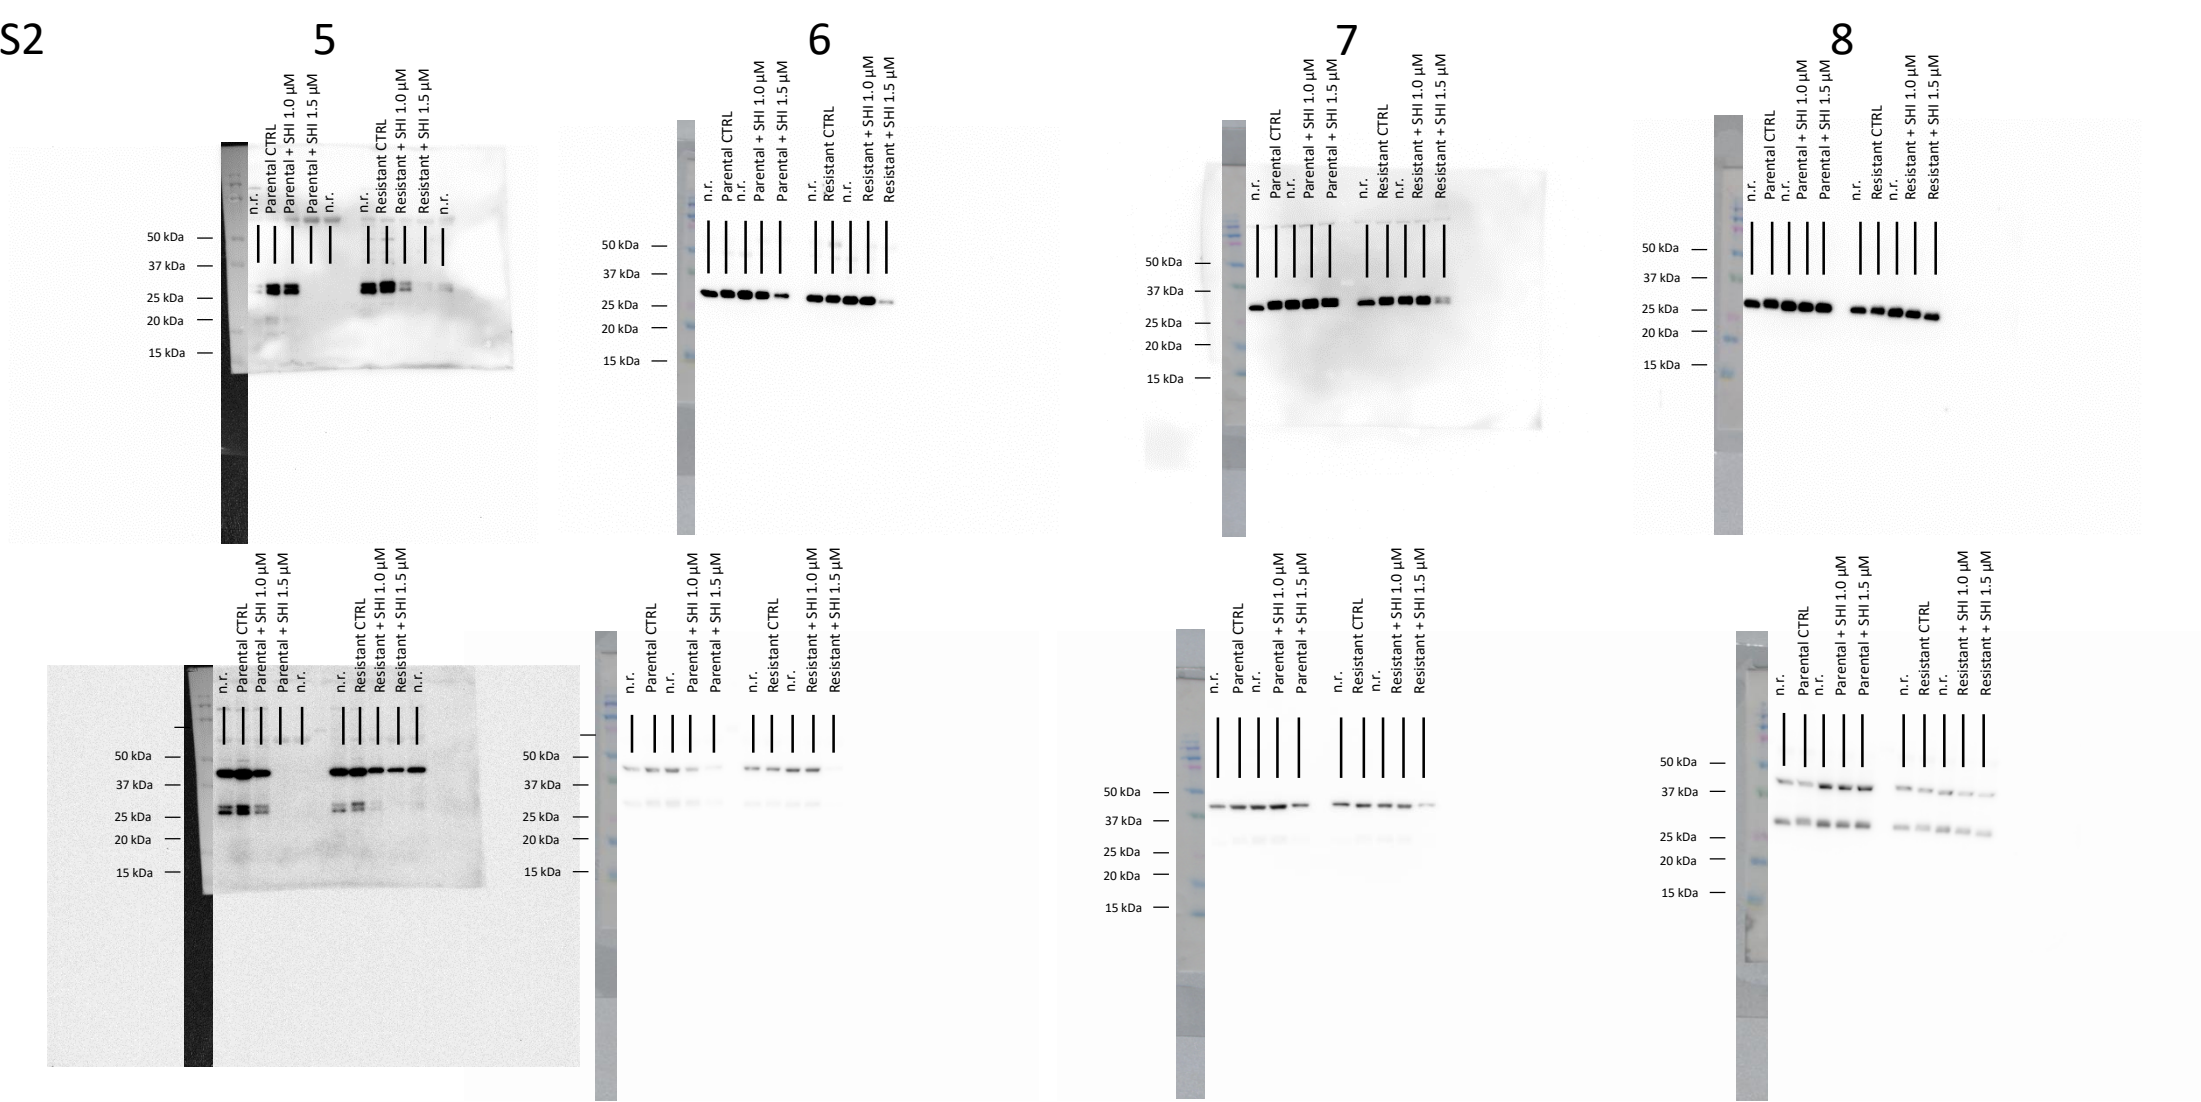

Figure S2g: Detailed information about Figure 5 - Protein expression and activity of cell cycle regulating proteins in parental and sunitinib-resistant 786-O cells after 48 h exposure to 1 or 1.5  $\mu$ M SHI. Protein expression of CDK2 (#), corresponding protein expression of  $\beta$ -actin (\*). n.r. = not relevant.

Figure S2

786-O

(#)

(\*)

$\beta$ -actin (45 kDa)

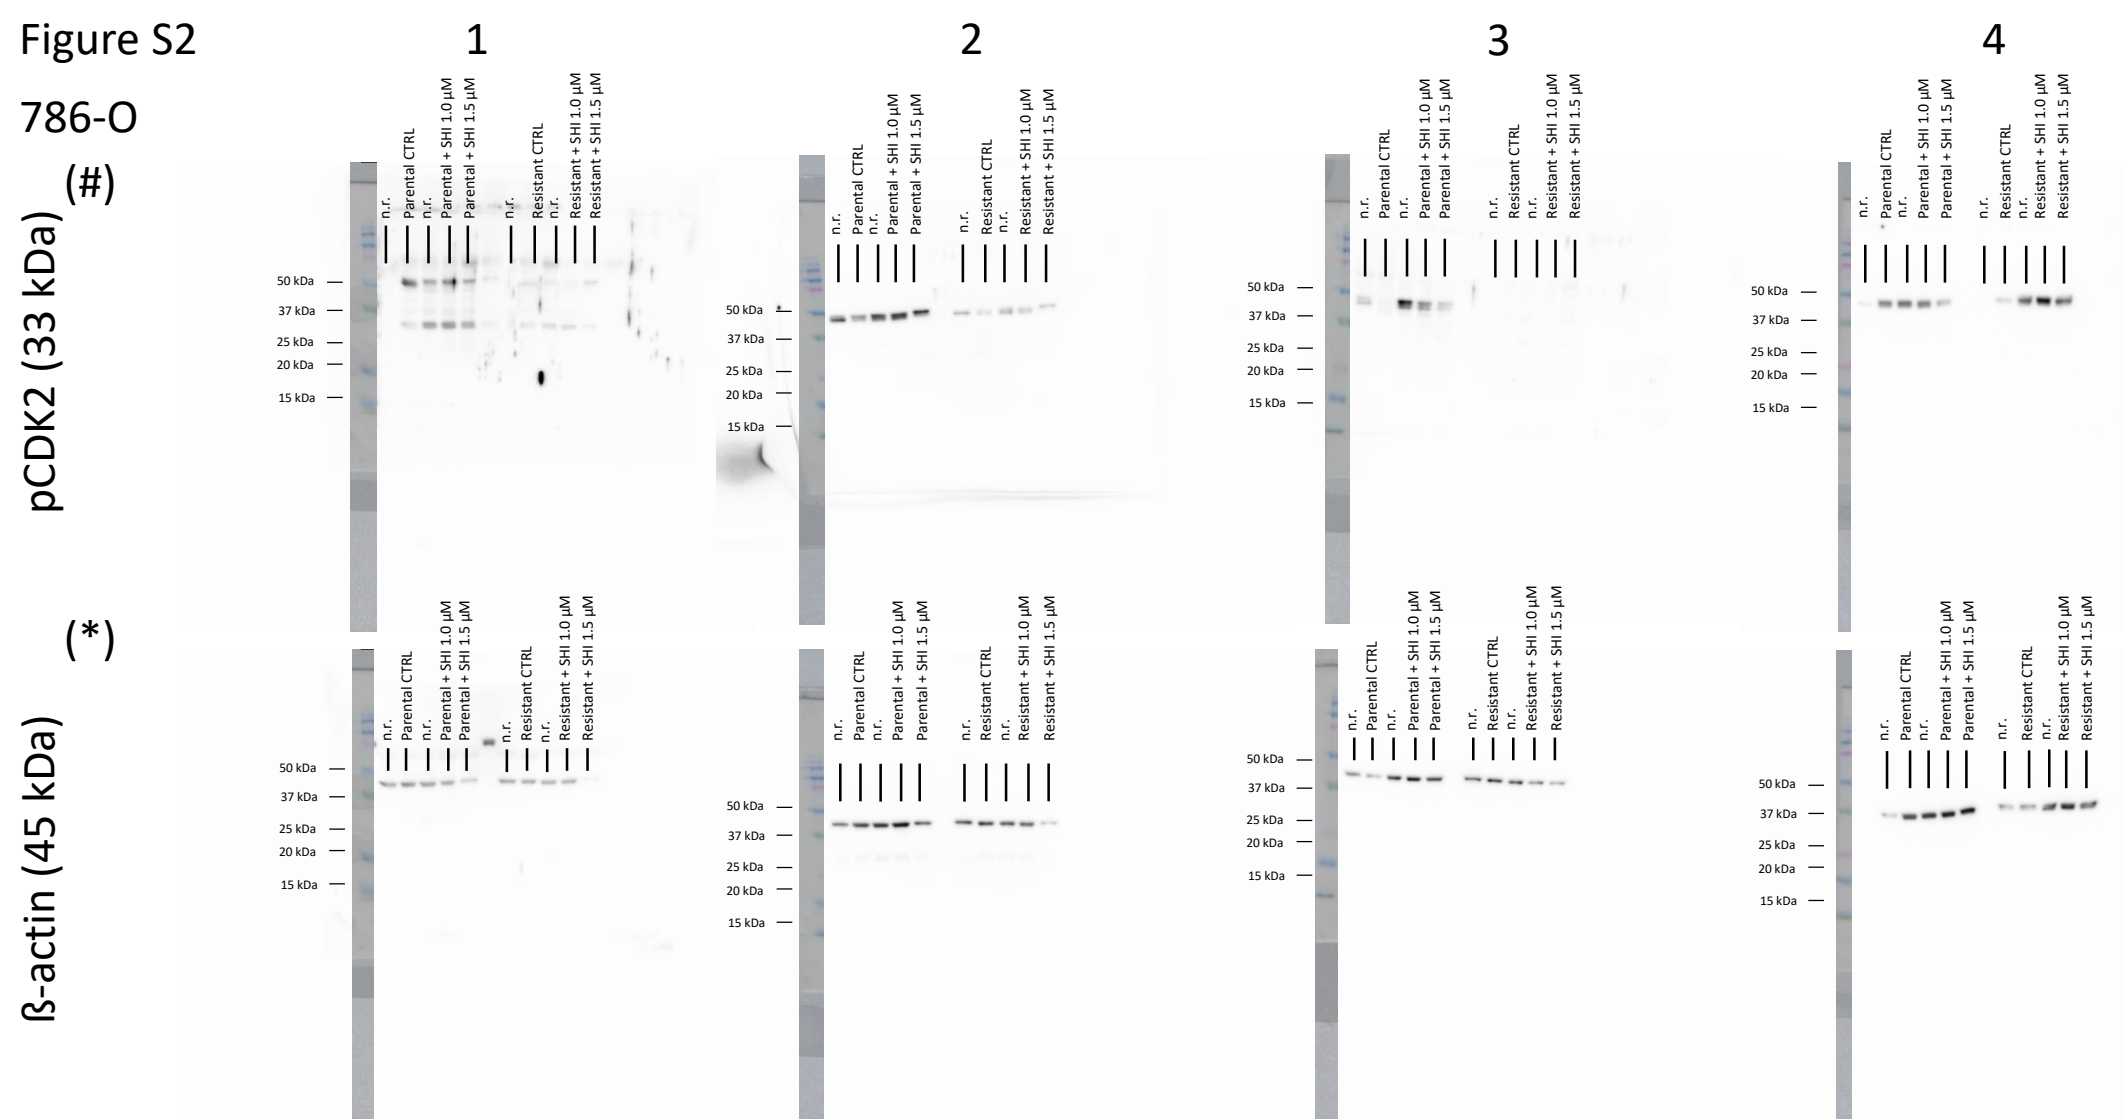

Figure S2f: Detailed information about Figure 5 - Protein expression and activity of cell cycle regulating proteins in parental and sunitinib-resistant 786-O cells after 48 h exposure to 1 or 1.5  $\mu$ M SHI. Protein expression of pCDK2 (#), corresponding protein expression of  $\beta$ -actin (\*). n.r. = not relevant.

# Nekroptose proteins

RIP1, pRIP1, RIP3, pRIP3, MLKL, pMLKL



CAKI-1  
(#)

RIP1 (78 kDa)

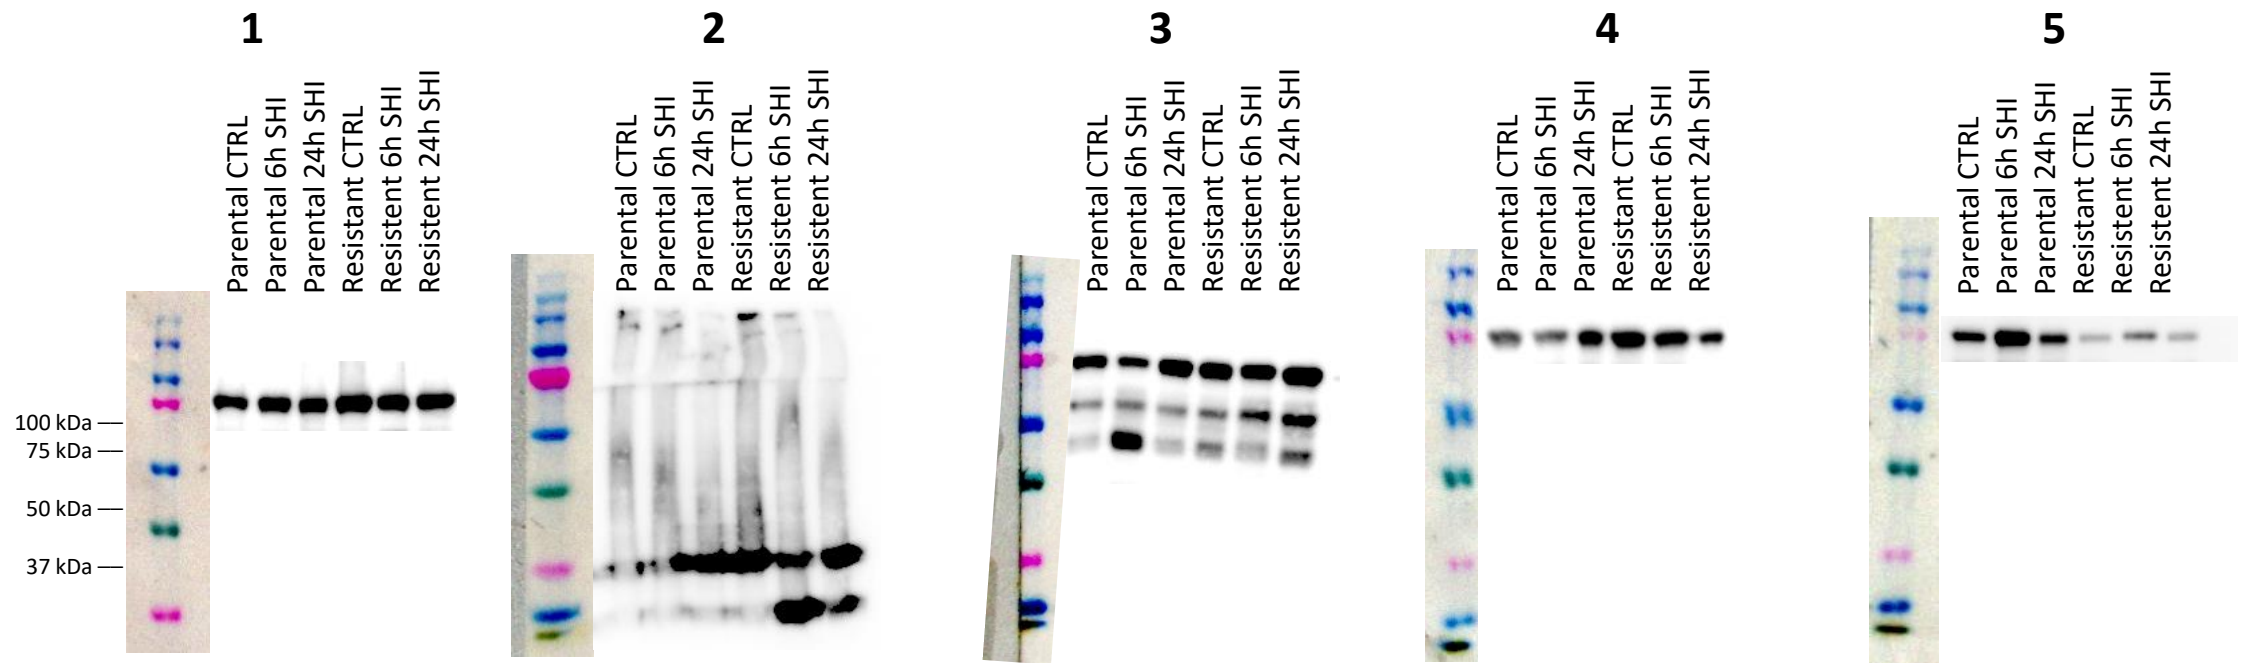

Total protein  
(\*)

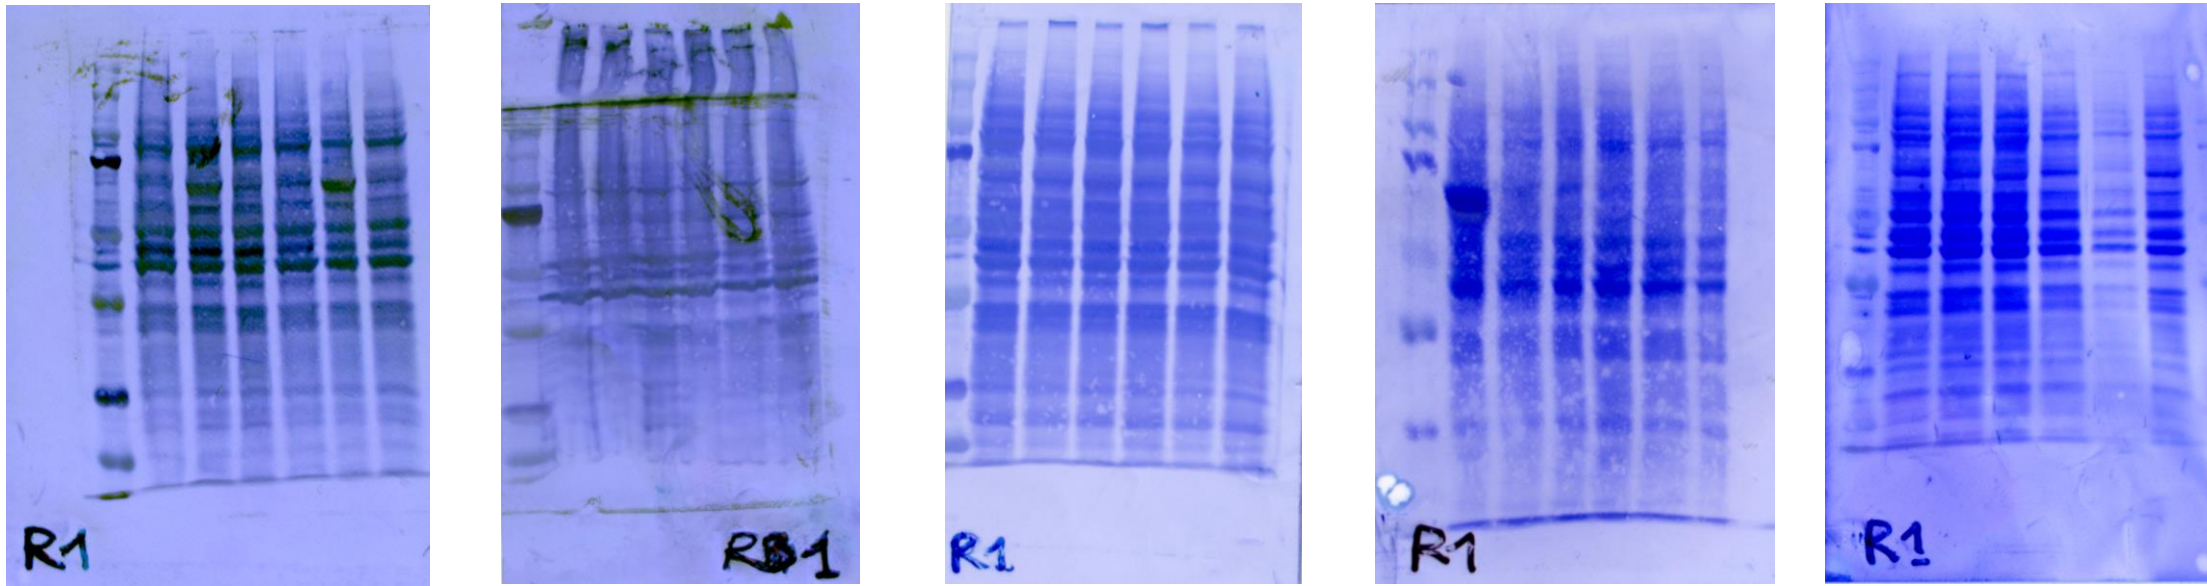

Figure S3a: Detailed information about Figure 10 - Necrosome complex key proteins in parental and sunitinib-resistant Caki-1 cells after 6 and 24 h exposure to 1  $\mu$ M SHI. Protein expression of RIP1 (#), corresponding Coomassie blue staining of total protein (\*).

# CAKI-1

(#)

pRIP1 (78-82 kDa)

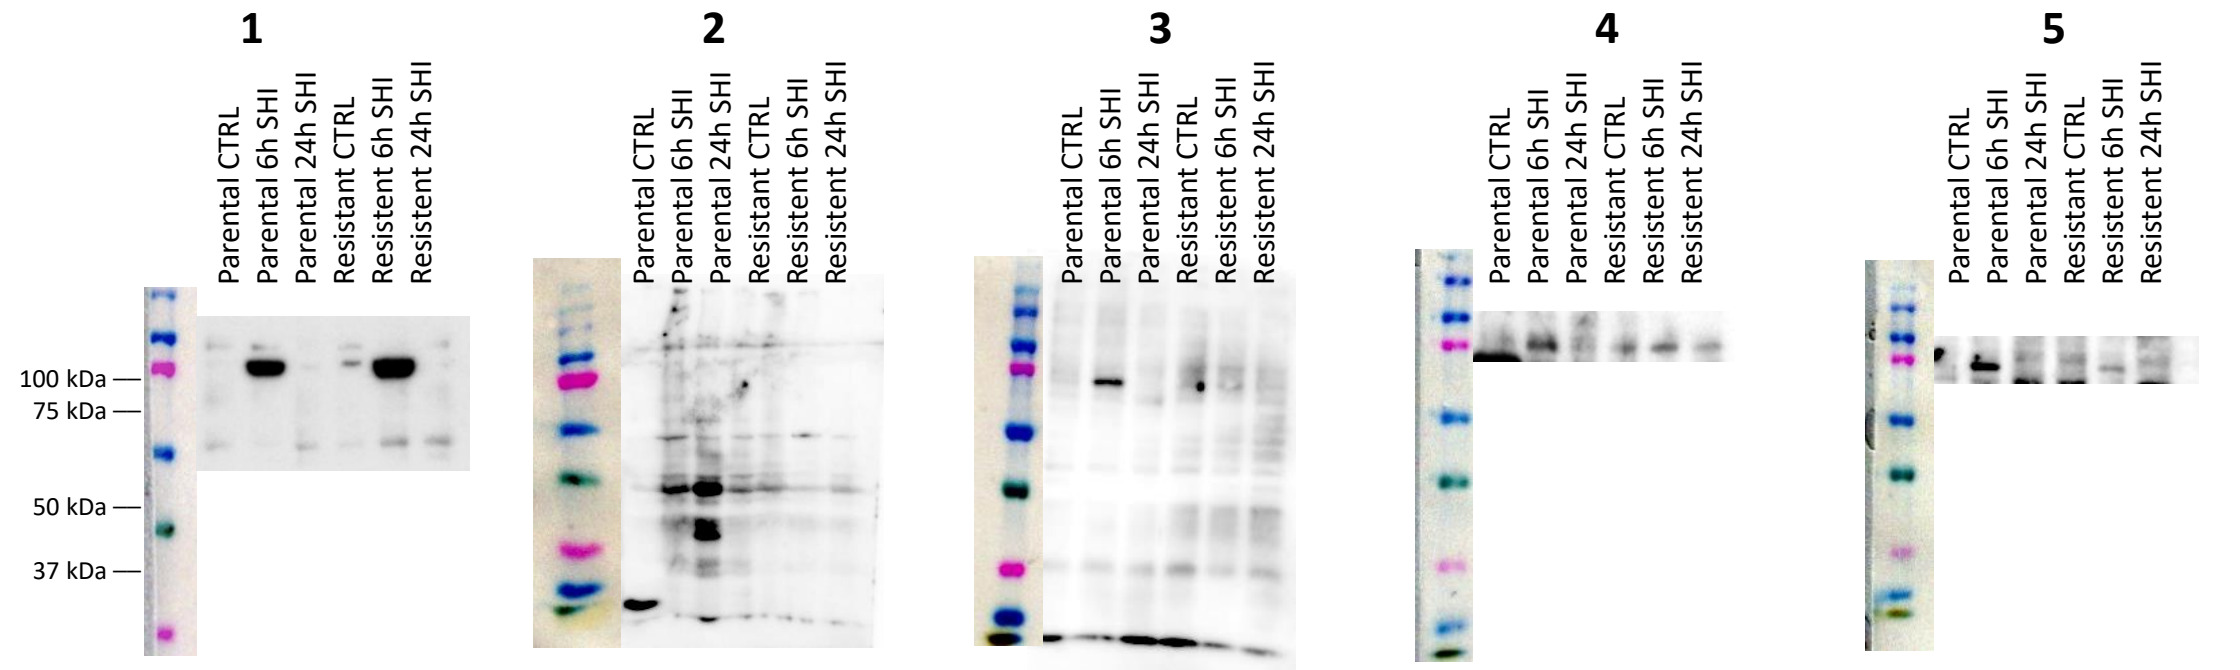

(\*)

Total protein

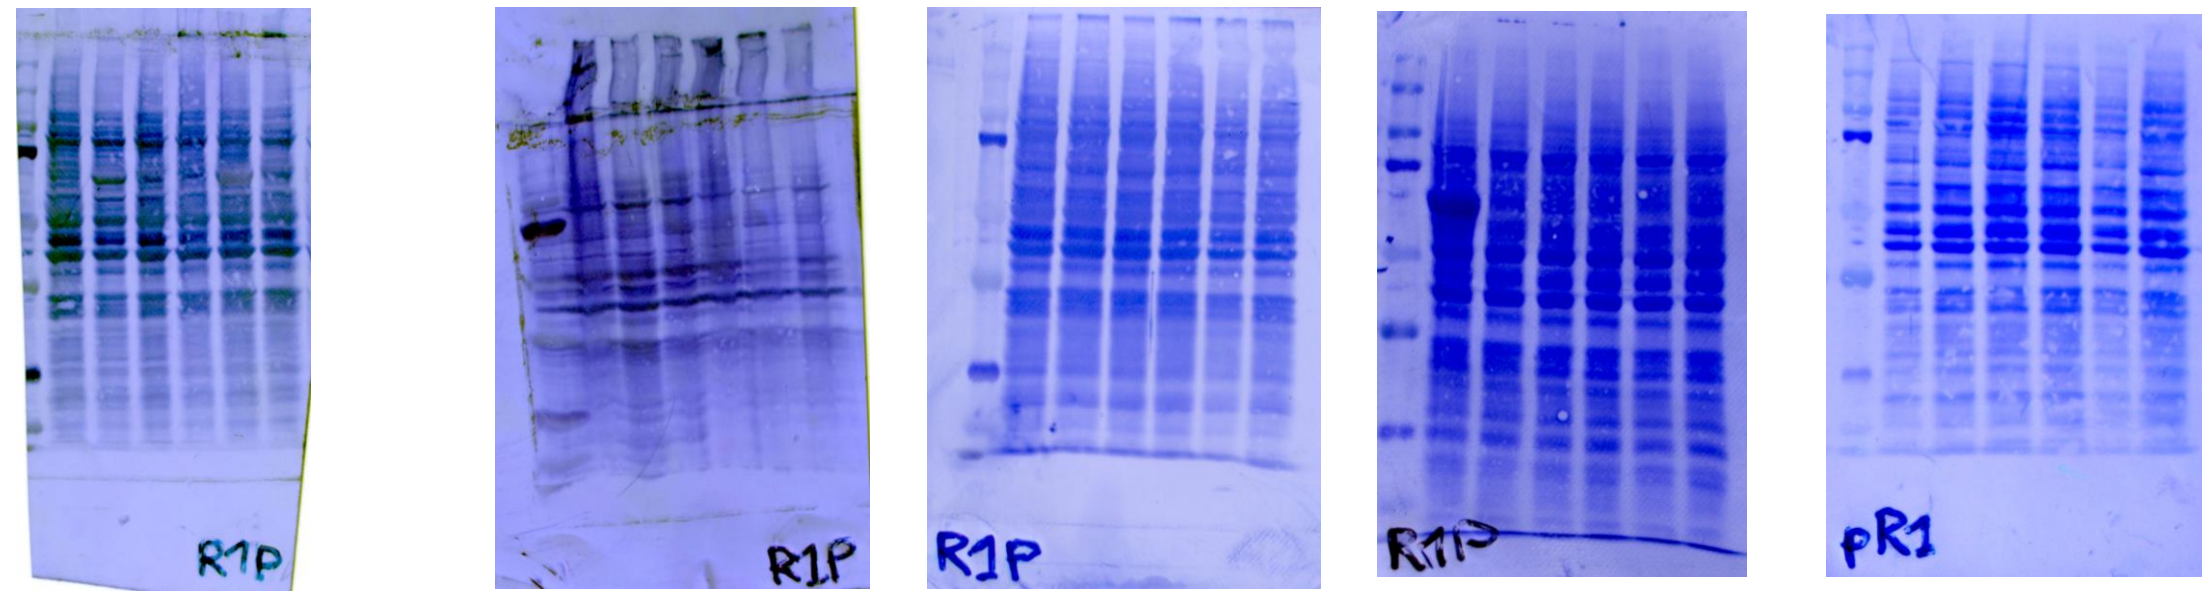

Figure S3b: Detailed information about Figure 10 - Necrosome complex key proteins in parental and sunitinib-resistant Caki-1 cells after 6 and 24 h exposure to 1  $\mu$ M SHI. Protein expression of pRIP1 (#), corresponding Coomassie blue staining of total protein (\*).



# CAKI-1

(#)

RIP3 (46-62 kDa)

100 kDa —  
75 kDa —  
50 kDa —  
37 kDa —

1

Parental CTRL  
Parental 6h SHI  
Parental 24h SHI  
Resistant CTRL  
Resistant 6h SHI  
Resistant 24h SHI

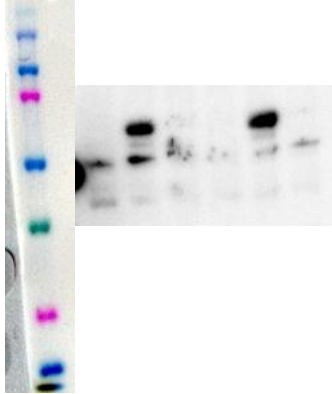

2

Parental CTRL  
Parental 6h SHI  
Parental 24h SHI  
Resistant CTRL  
Resistant 6h SHI  
Resistant 24h SHI

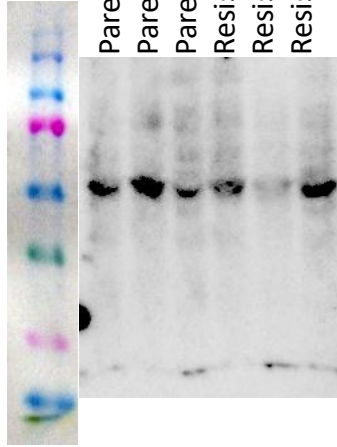

3

Parental CTRL  
Parental 6h SHI  
Parental 24h SHI  
Resistant CTRL  
Resistant 6h SHI  
Resistant 24h SHI

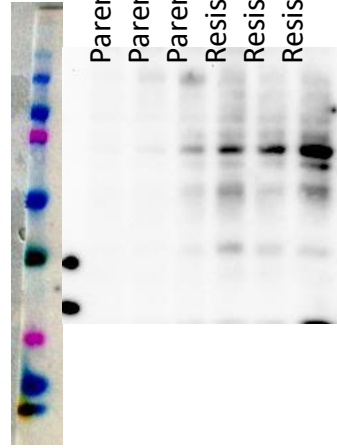

4

Parental CTRL  
Parental 6h SHI  
Parental 24h SHI  
Resistant CTRL  
Resistant 6h SHI  
Resistant 24h SHI

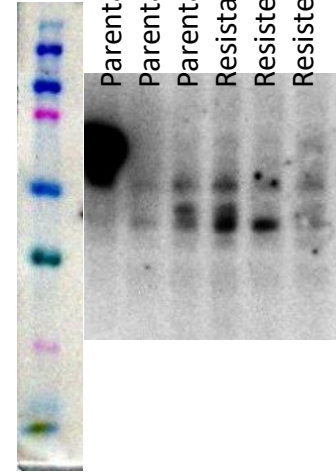

5

Parental CTRL  
Parental 6h SHI  
Parental 24h SHI  
Resistant CTRL  
Resistant 6h SHI  
Resistant 24h SHI

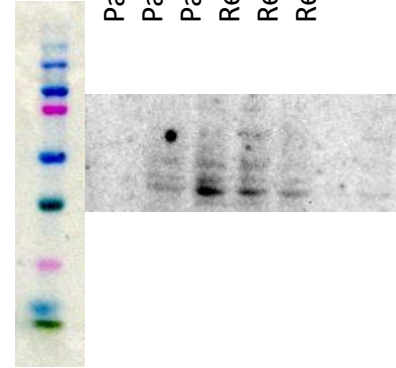

(\*)

Total protein

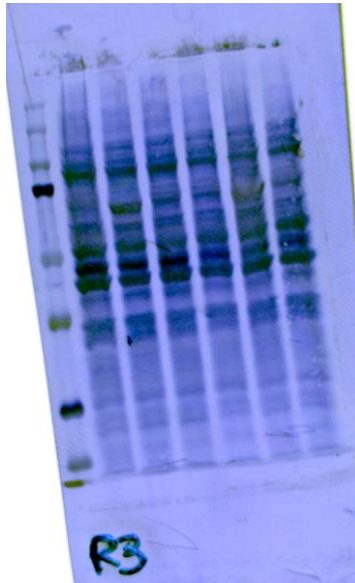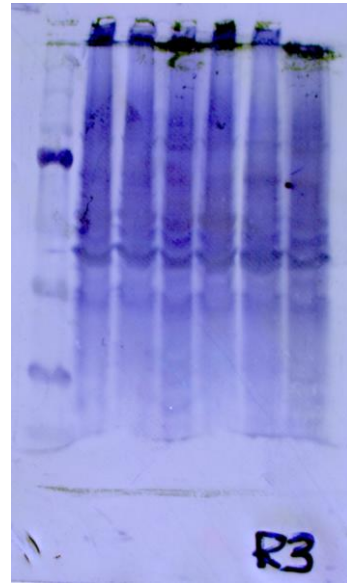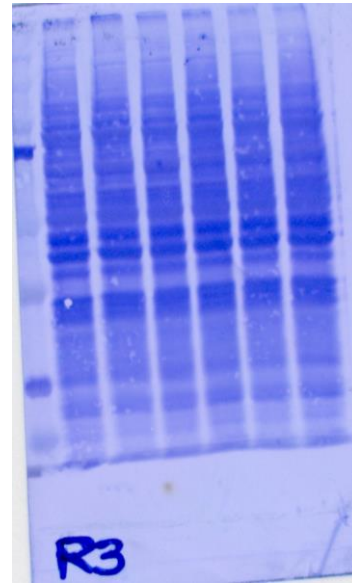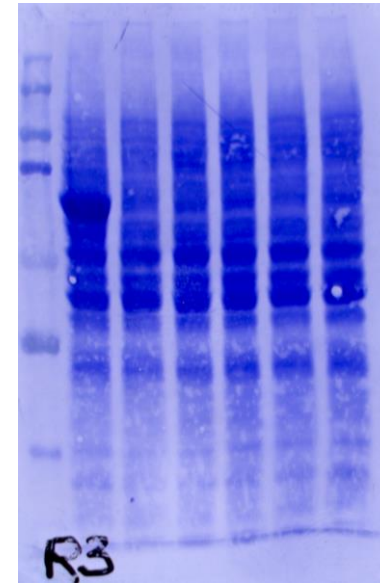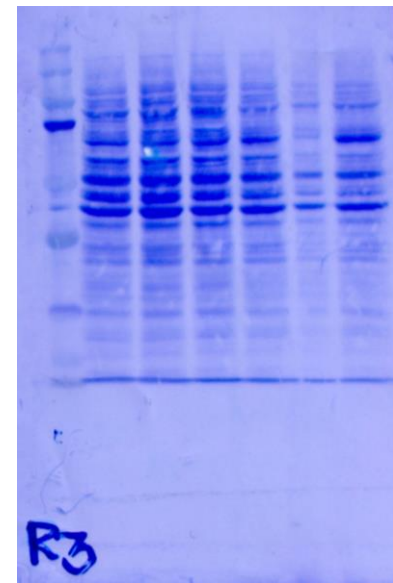

Figure S3c: Detailed information about Figure 10 - Necrosome complex key proteins in parental and sunitinib-resistant Caki-1 cells after 6 and 24 h exposure to 1  $\mu$ M SHI. Protein expression of RIP3 (#), corresponding Coomassie blue staining of total protein (\*).



# CAKI-1

(#)

pRIP3 (46-62 kDa)

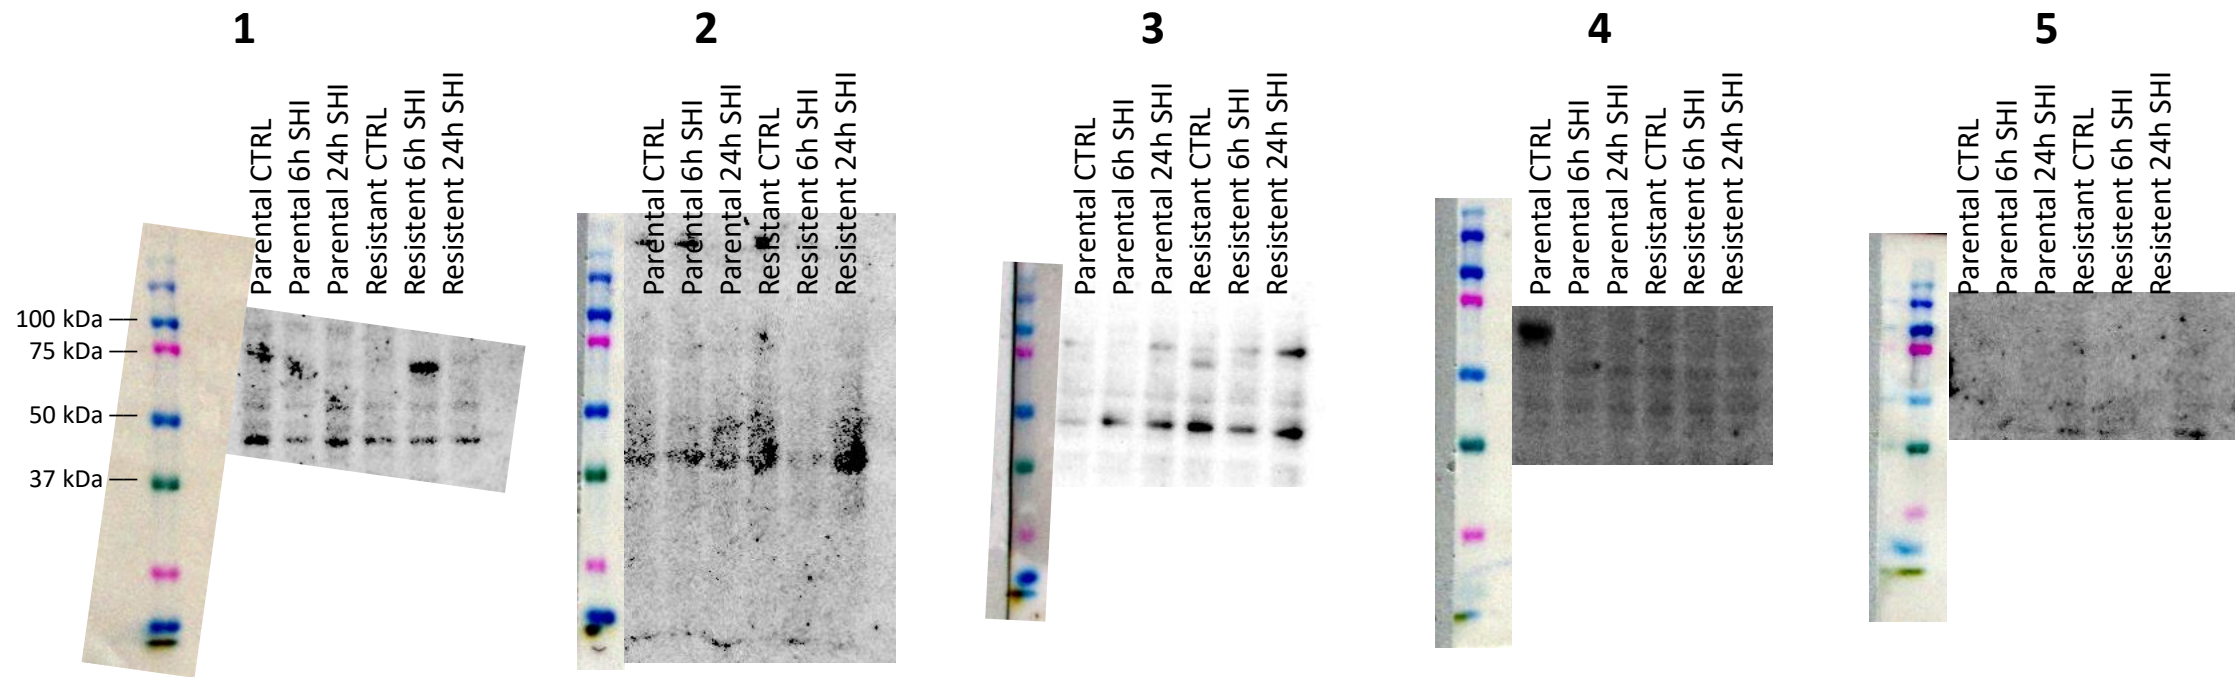

(\*)

Total protein

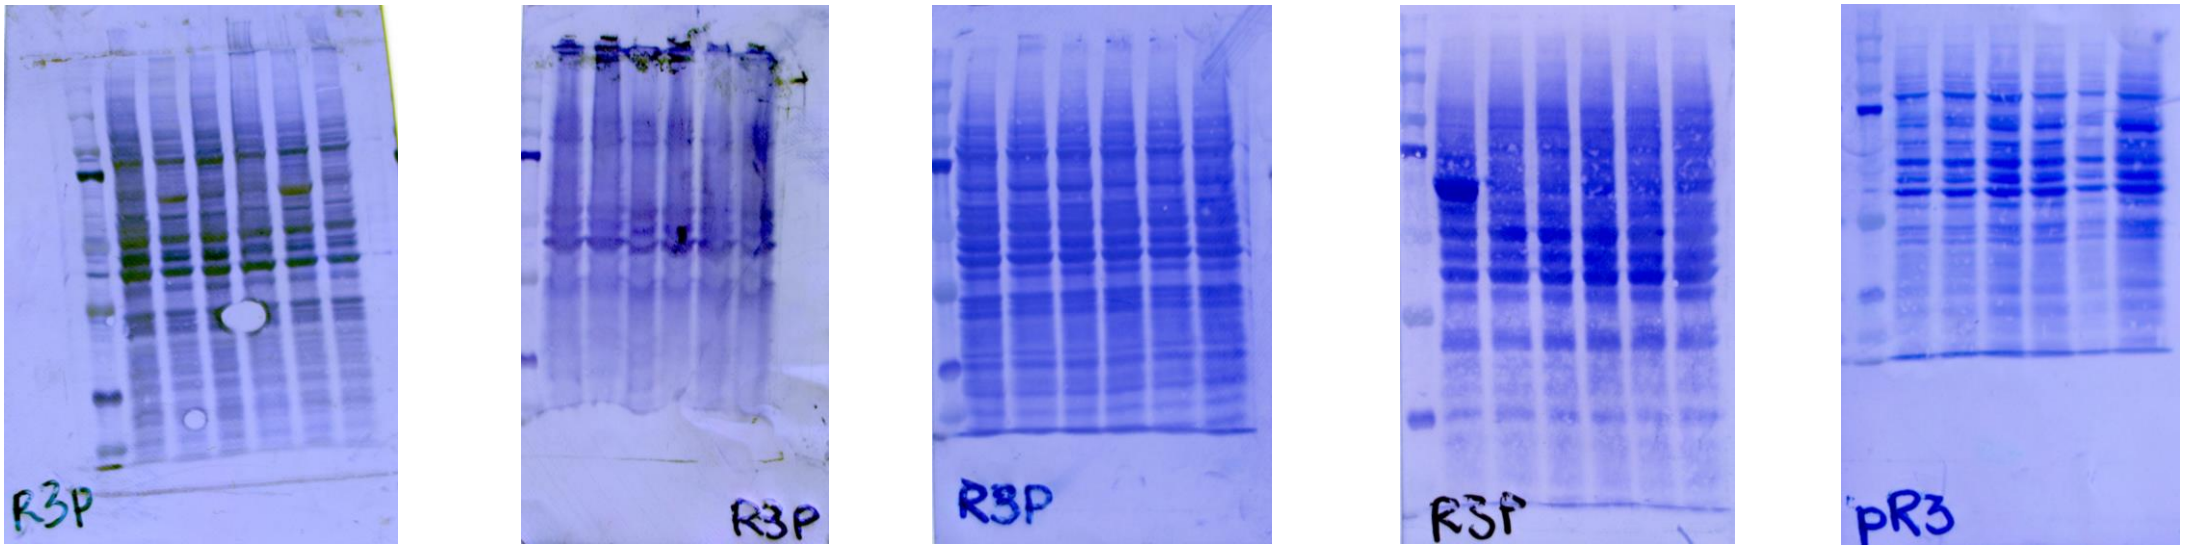

Figure S3d: Detailed information about Figure 10 - Necrosome complex key proteins in parental and sunitinib-resistant Caki-1 cells after 6 and 24 h exposure to 1  $\mu$ M SHI. Protein expression of pRIP3 (#), corresponding Coomassie blue staining of total protein (\*).

# CAKI-1

(#)

MLKL (54 kDa)

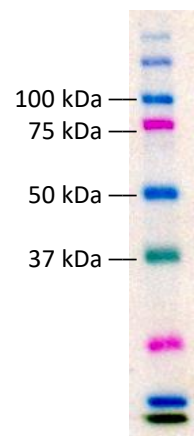

1

Parental CTRL  
Parental 6h SHI  
Parental 24h SHI  
Resistant CTRL  
Resistant 6h SHI  
Resistant 24h SHI

2

Parental CTRL  
Parental 6h SHI  
Parental 24h SHI  
Resistant CTRL  
Resistant 6h SHI  
Resistant 24h SHI

3

Parental CTRL  
Parental 6h SHI  
Parental 24h SHI  
Resistant CTRL  
Resistant 6h SHI  
Resistant 24h SHI

4

Parental CTRL  
Parental 6h SHI  
Parental 24h SHI  
Resistant CTRL  
Resistant 6h SHI  
Resistant 24h SHI

5

Parental CTRL  
Parental 6h SHI  
Parental 24h SHI  
Resistant CTRL  
Resistant 6h SHI  
Resistant 24h SHI

(\*)

Total protein

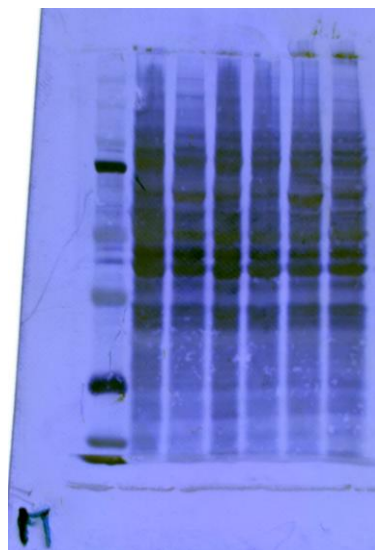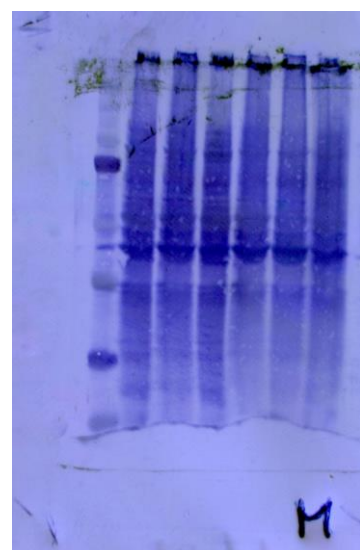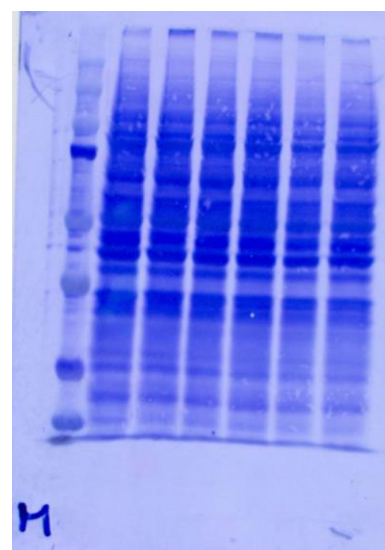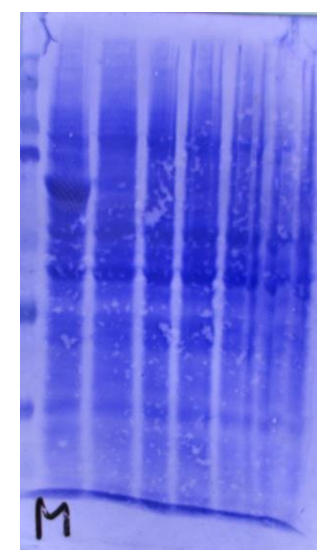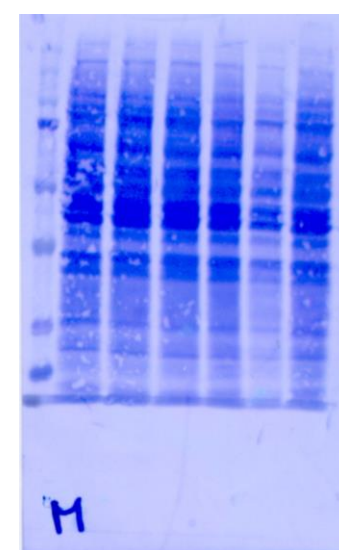

Figure S3e: Detailed information about Figure 10 - Necrosome complex key proteins in parental and sunitinib-resistant Caki-1 cells after 6 and 24 h exposure to 1  $\mu$ M SHI. Protein expression of MLKL (#), corresponding Coomassie blue staining of total protein (\*).



# CAKI-1

(#)

pMLKL (54 kDa)

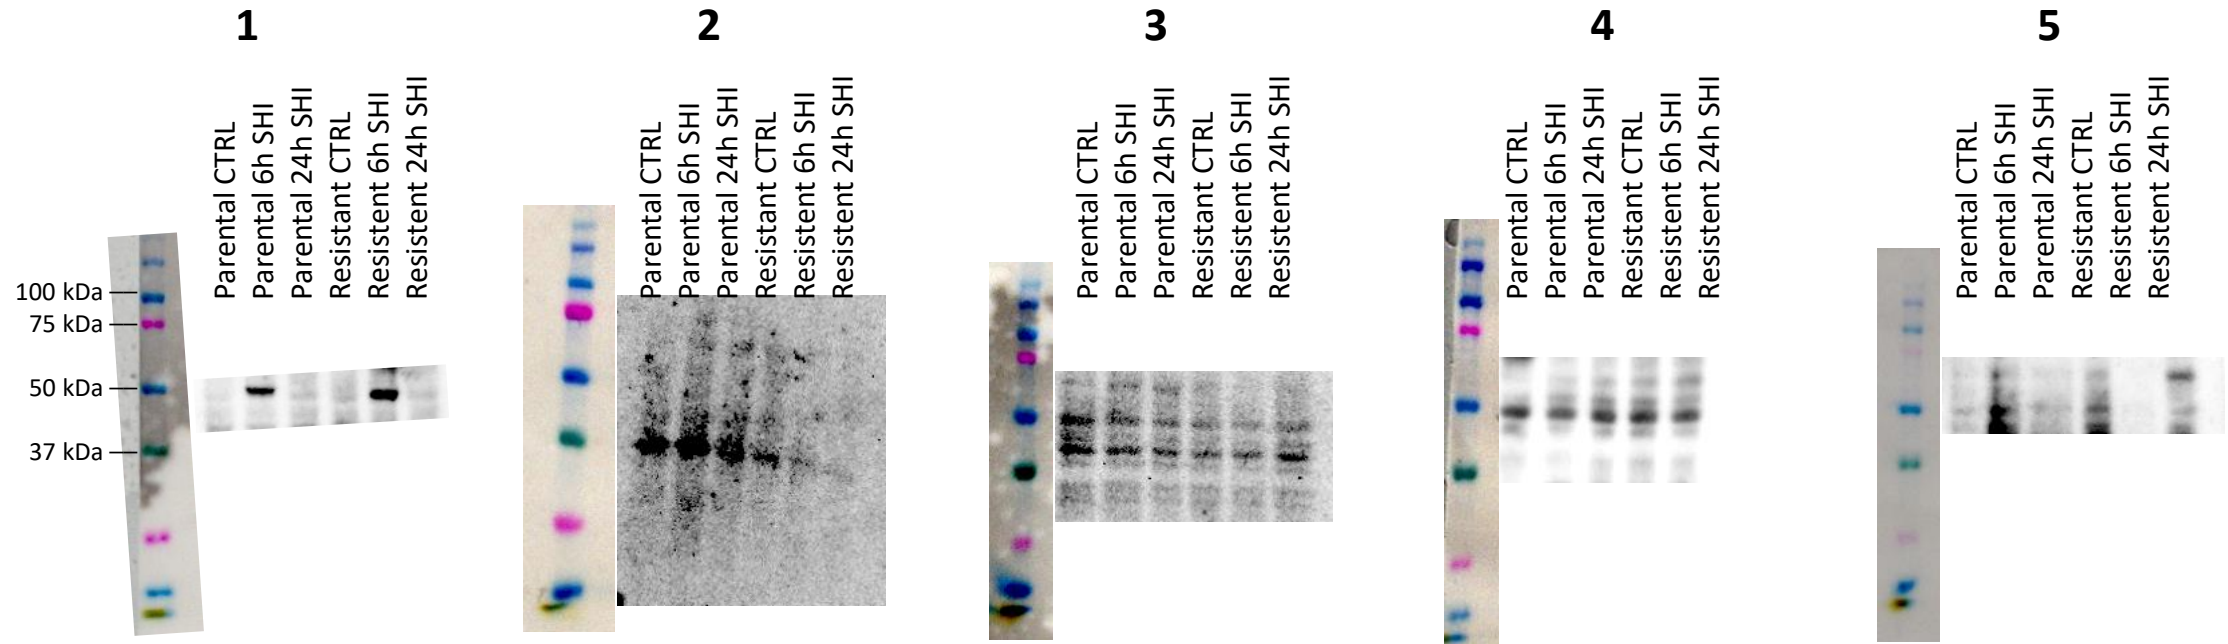

(\*)

Total protein

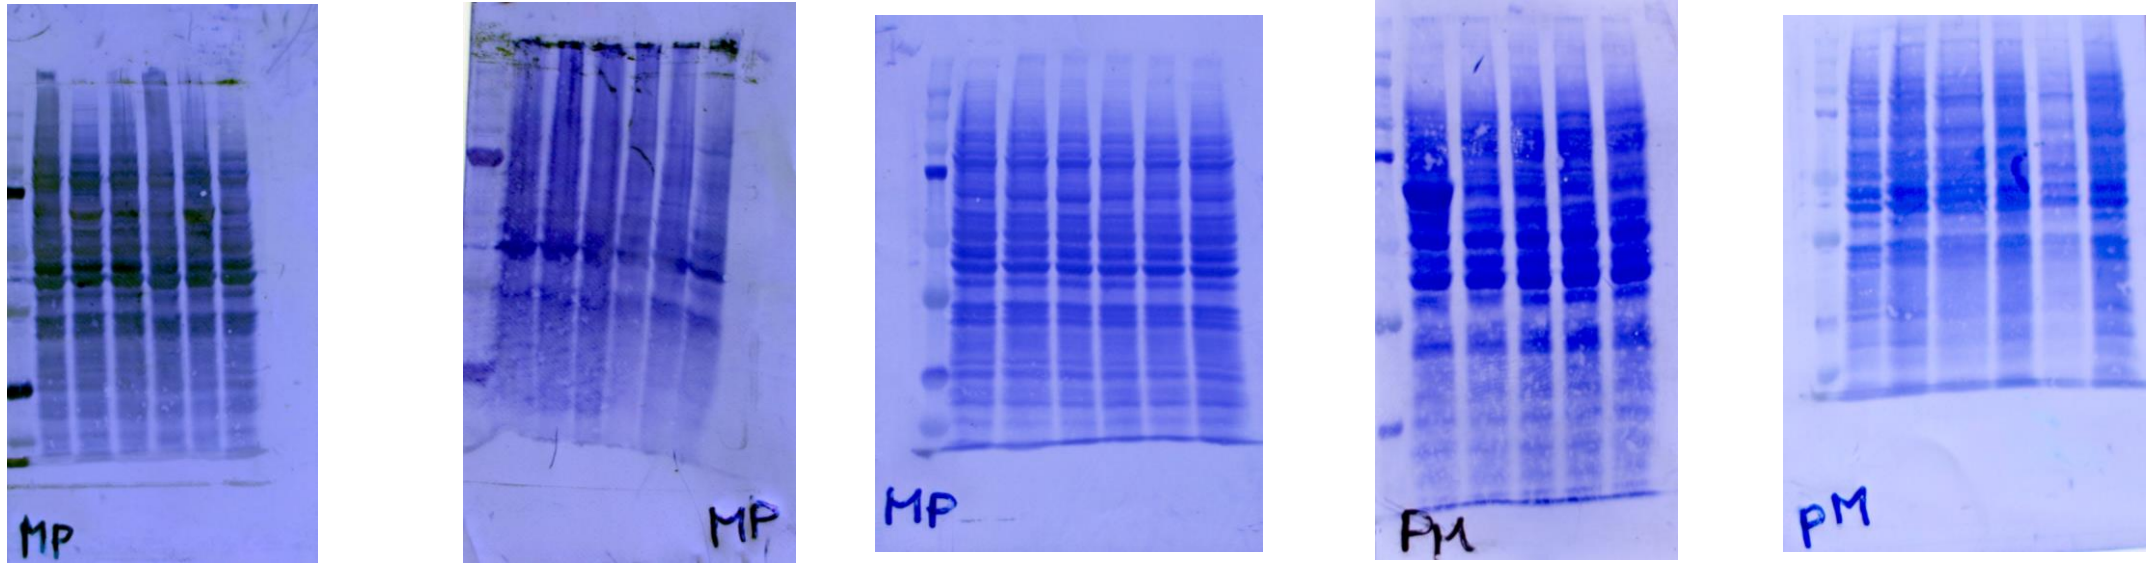

Figure S3f: Detailed information about Figure 10 - Necrosome complex key proteins in parental and sunitinib-resistant Caki-1 cells after 6 and 24 h exposure to 1  $\mu$ M SHI. Protein expression of pMLKL (#), corresponding Coomassie blue staining of total protein (\*).



# Signal proteins

AKT, pAKT, mTOR, pmTOR

# CAKI-1

(#)

AKT (60 kDa)

(\*)

Total protein

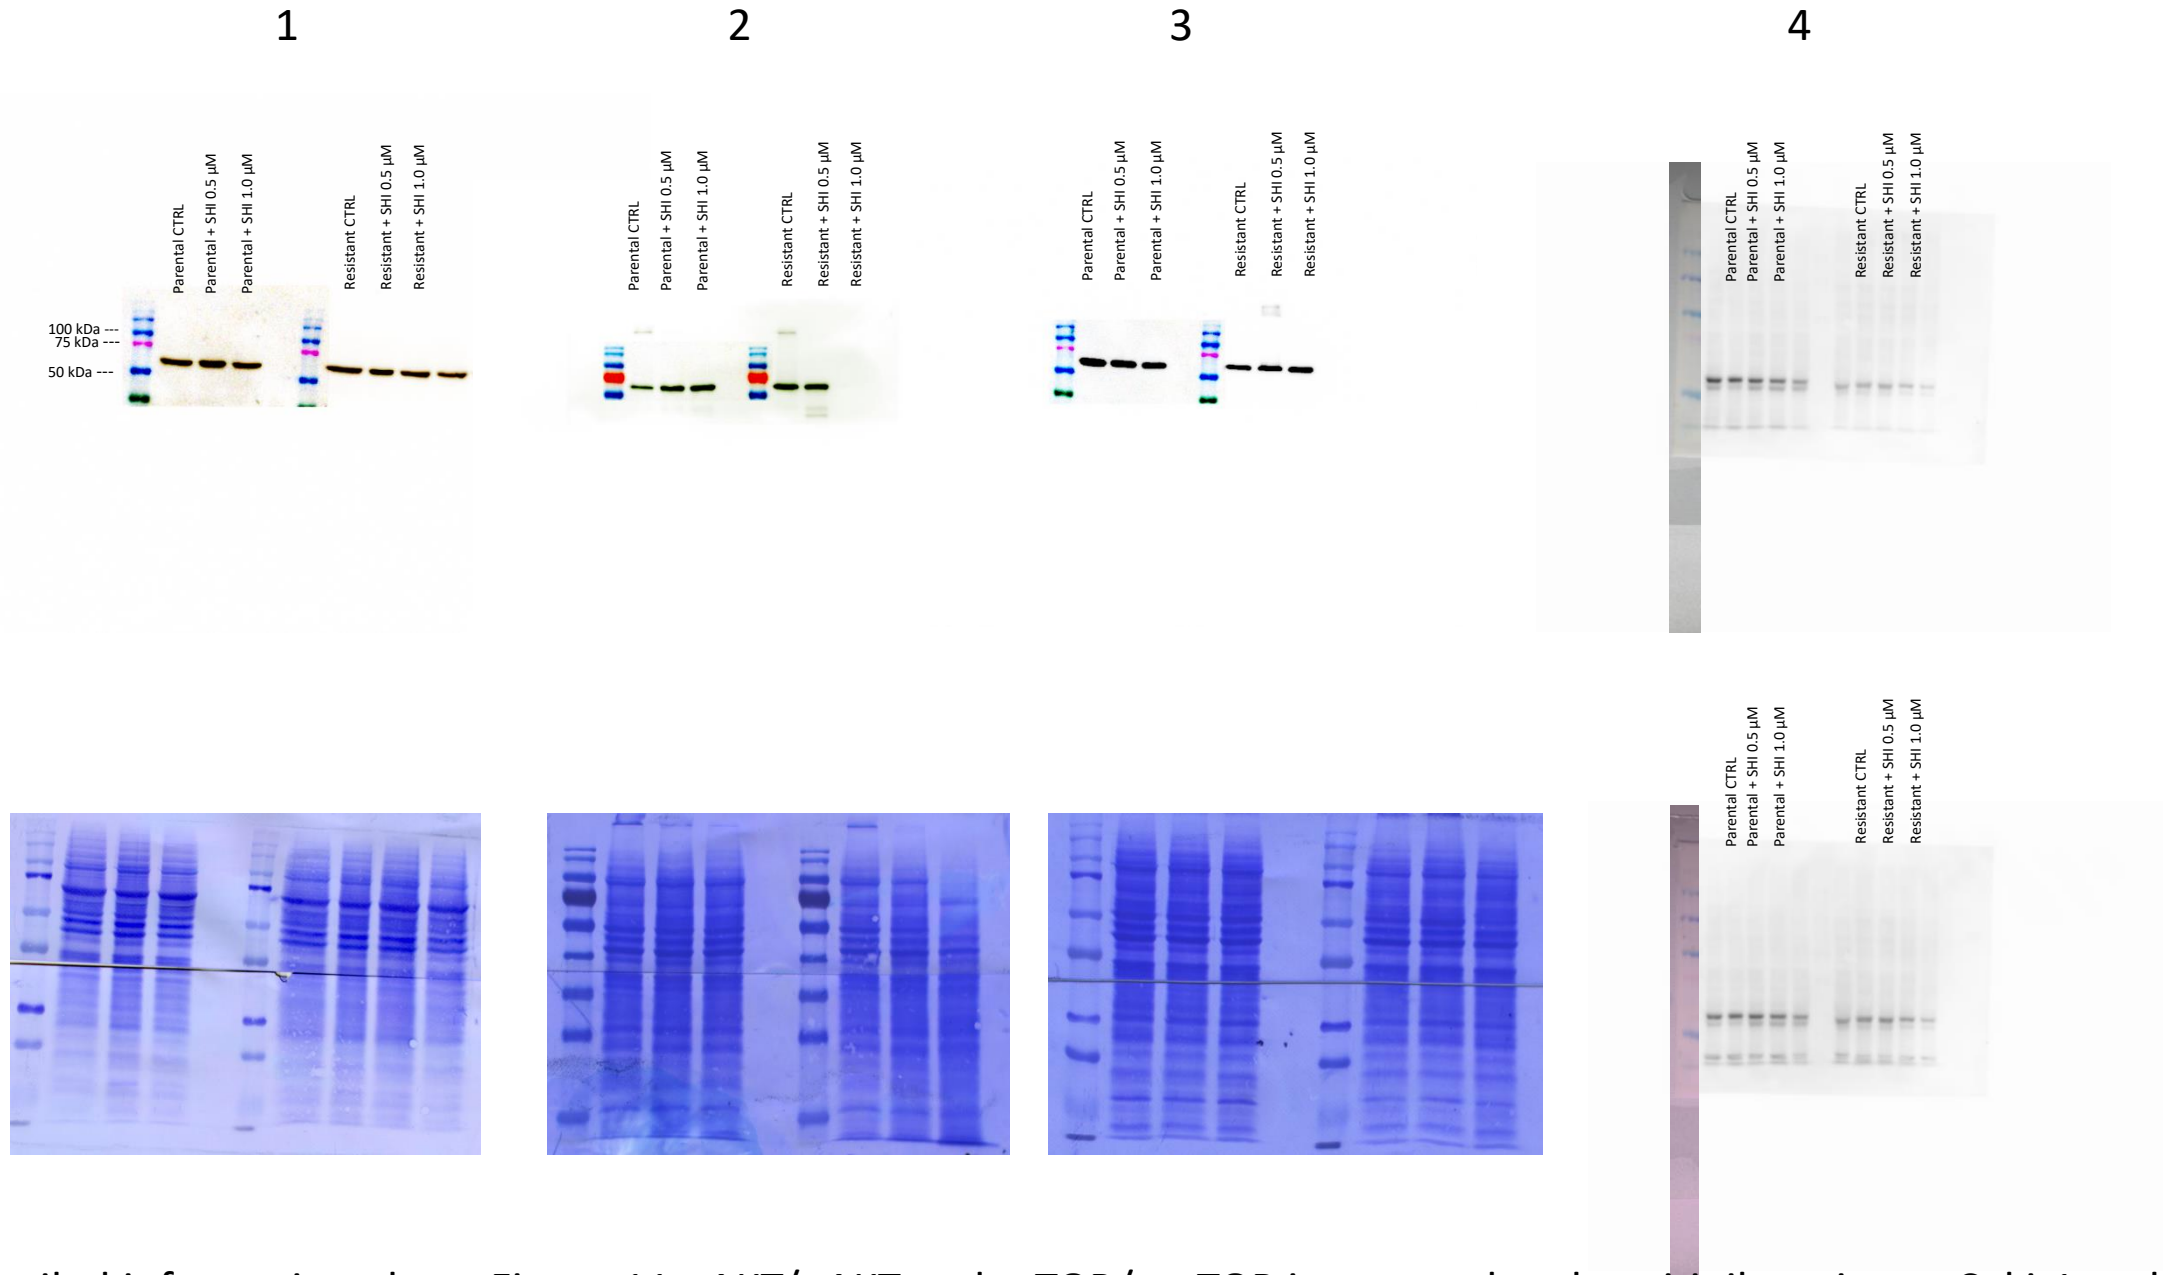

Figure S4a: Detailed information about Figure 11 - AKT/pAKT and mTOR/pmTOR in parental and sunitinib-resistant Caki-1 and 786-O cells after 48 h exposure to SHI [0.5, 1.0  $\mu$ M]. Protein expression of AKT (#), corresponding protein expression of  $\beta$ -actin or Coomassie blue staining of total protein (\*).

CAKI-1

pAKT (60 kDa)

(#)

(\*)

Total protein

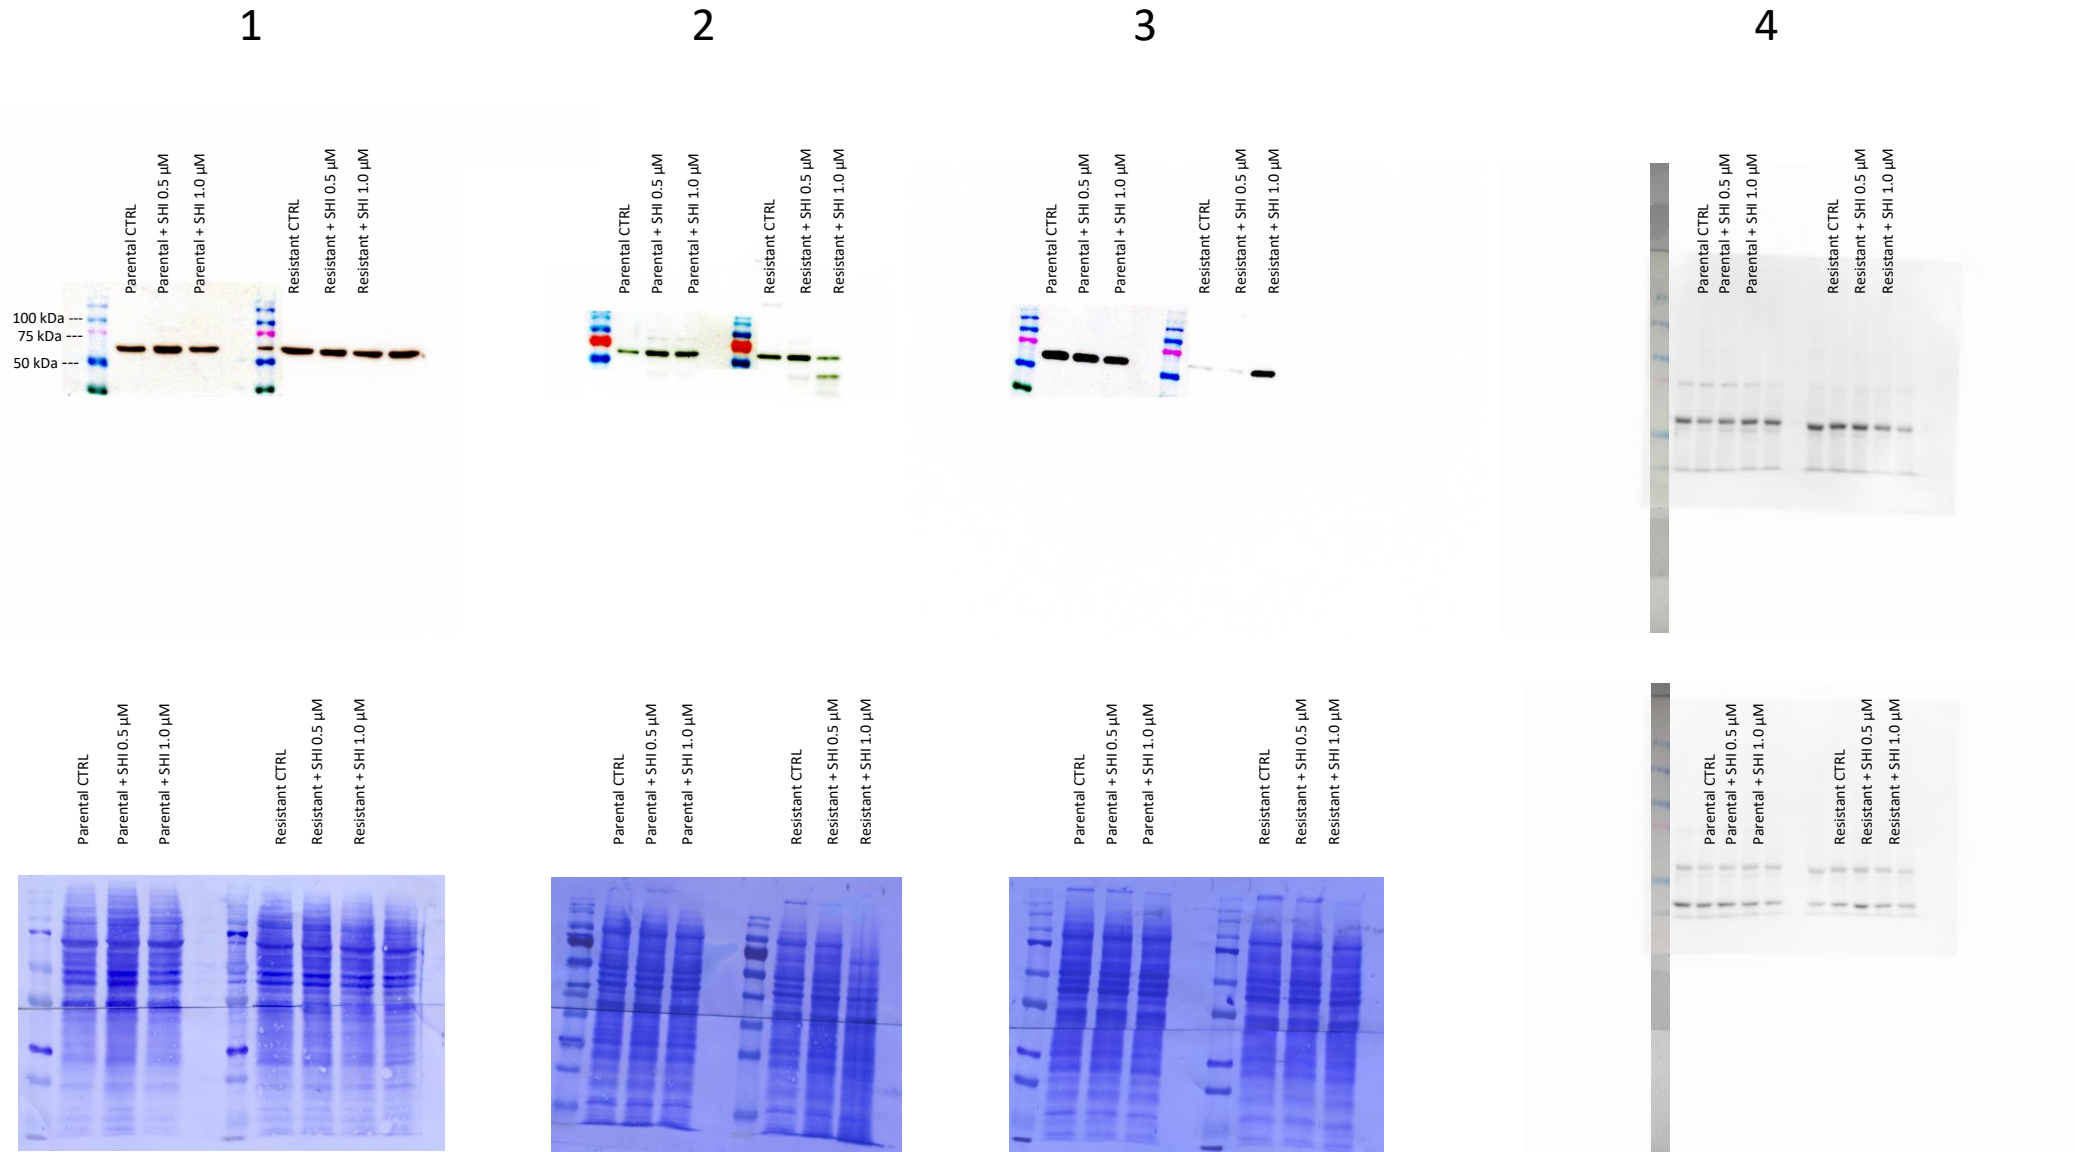

Figure S4b: Detailed information about Figure 11 - AKT/pAKT and mTOR/pmTOR in parental and sunitinib-resistant Caki-1 and 786-O cells after 48 h exposure to SHI [0.5, 1.0  $\mu$ M]. Protein expression of pAKT (#), corresponding protein expression of  $\beta$ -actin or Coomassie blue staining of total protein (\*).



# CAKI-1

(#)

mTOR (289 kDa)

(\*)

Total protein

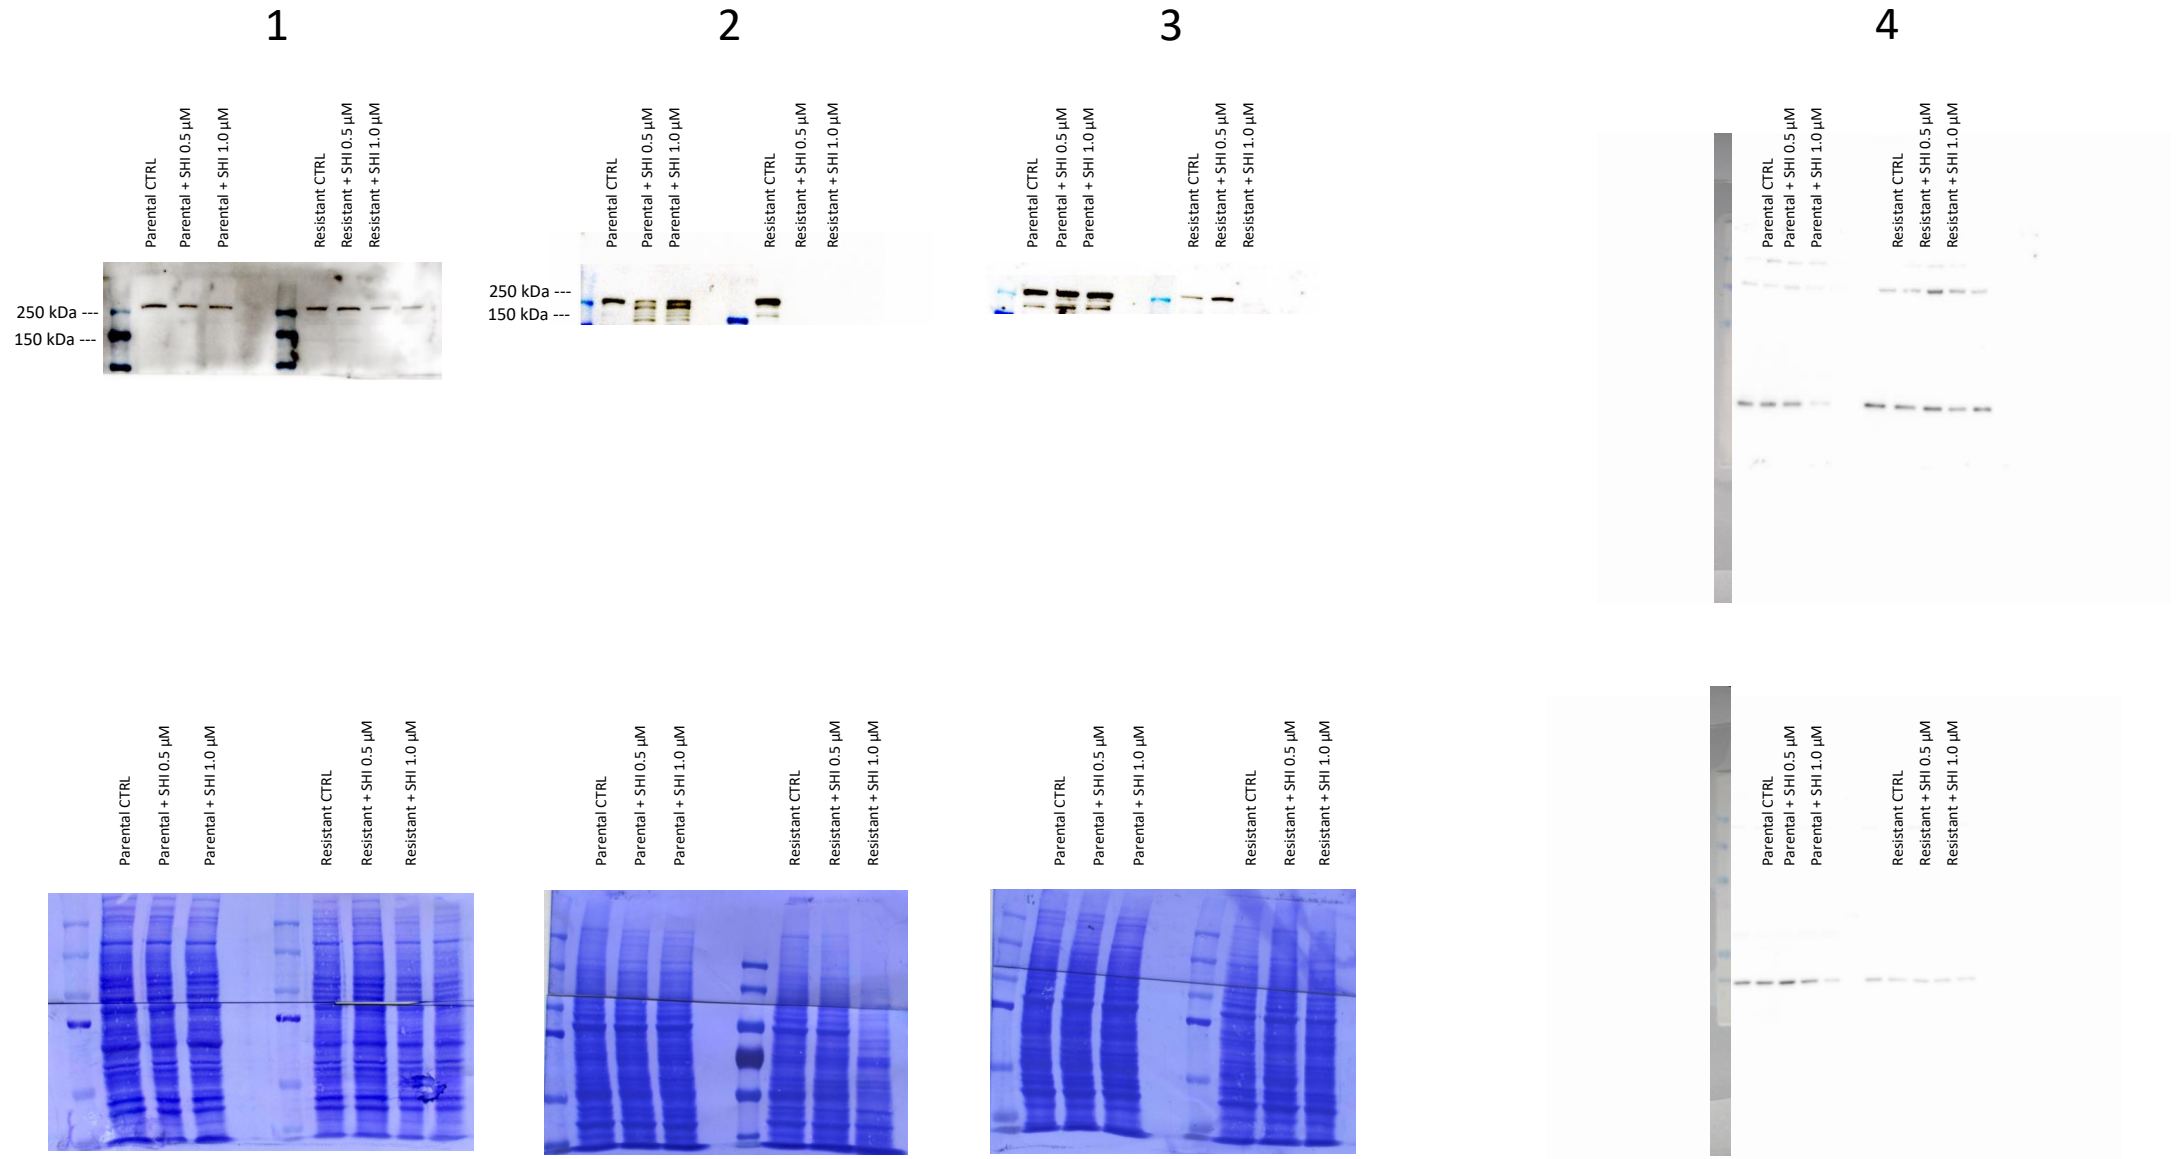

Figure S4c: Detailed information about Figure 11 - AKT/pAKT and mTOR/pmTOR in parental and sunitinib-resistant Caki-1 and 786-O cells after 48 h exposure to SHI [0.5, 1.0  $\mu$ M]. Protein expression of mTOR (#), corresponding protein expression of  $\beta$ -actin or Coomassie blue staining of total protein (\*).

# CAKI-1

(#)

pmTOR (289 kDa)

(\*)

Total protein

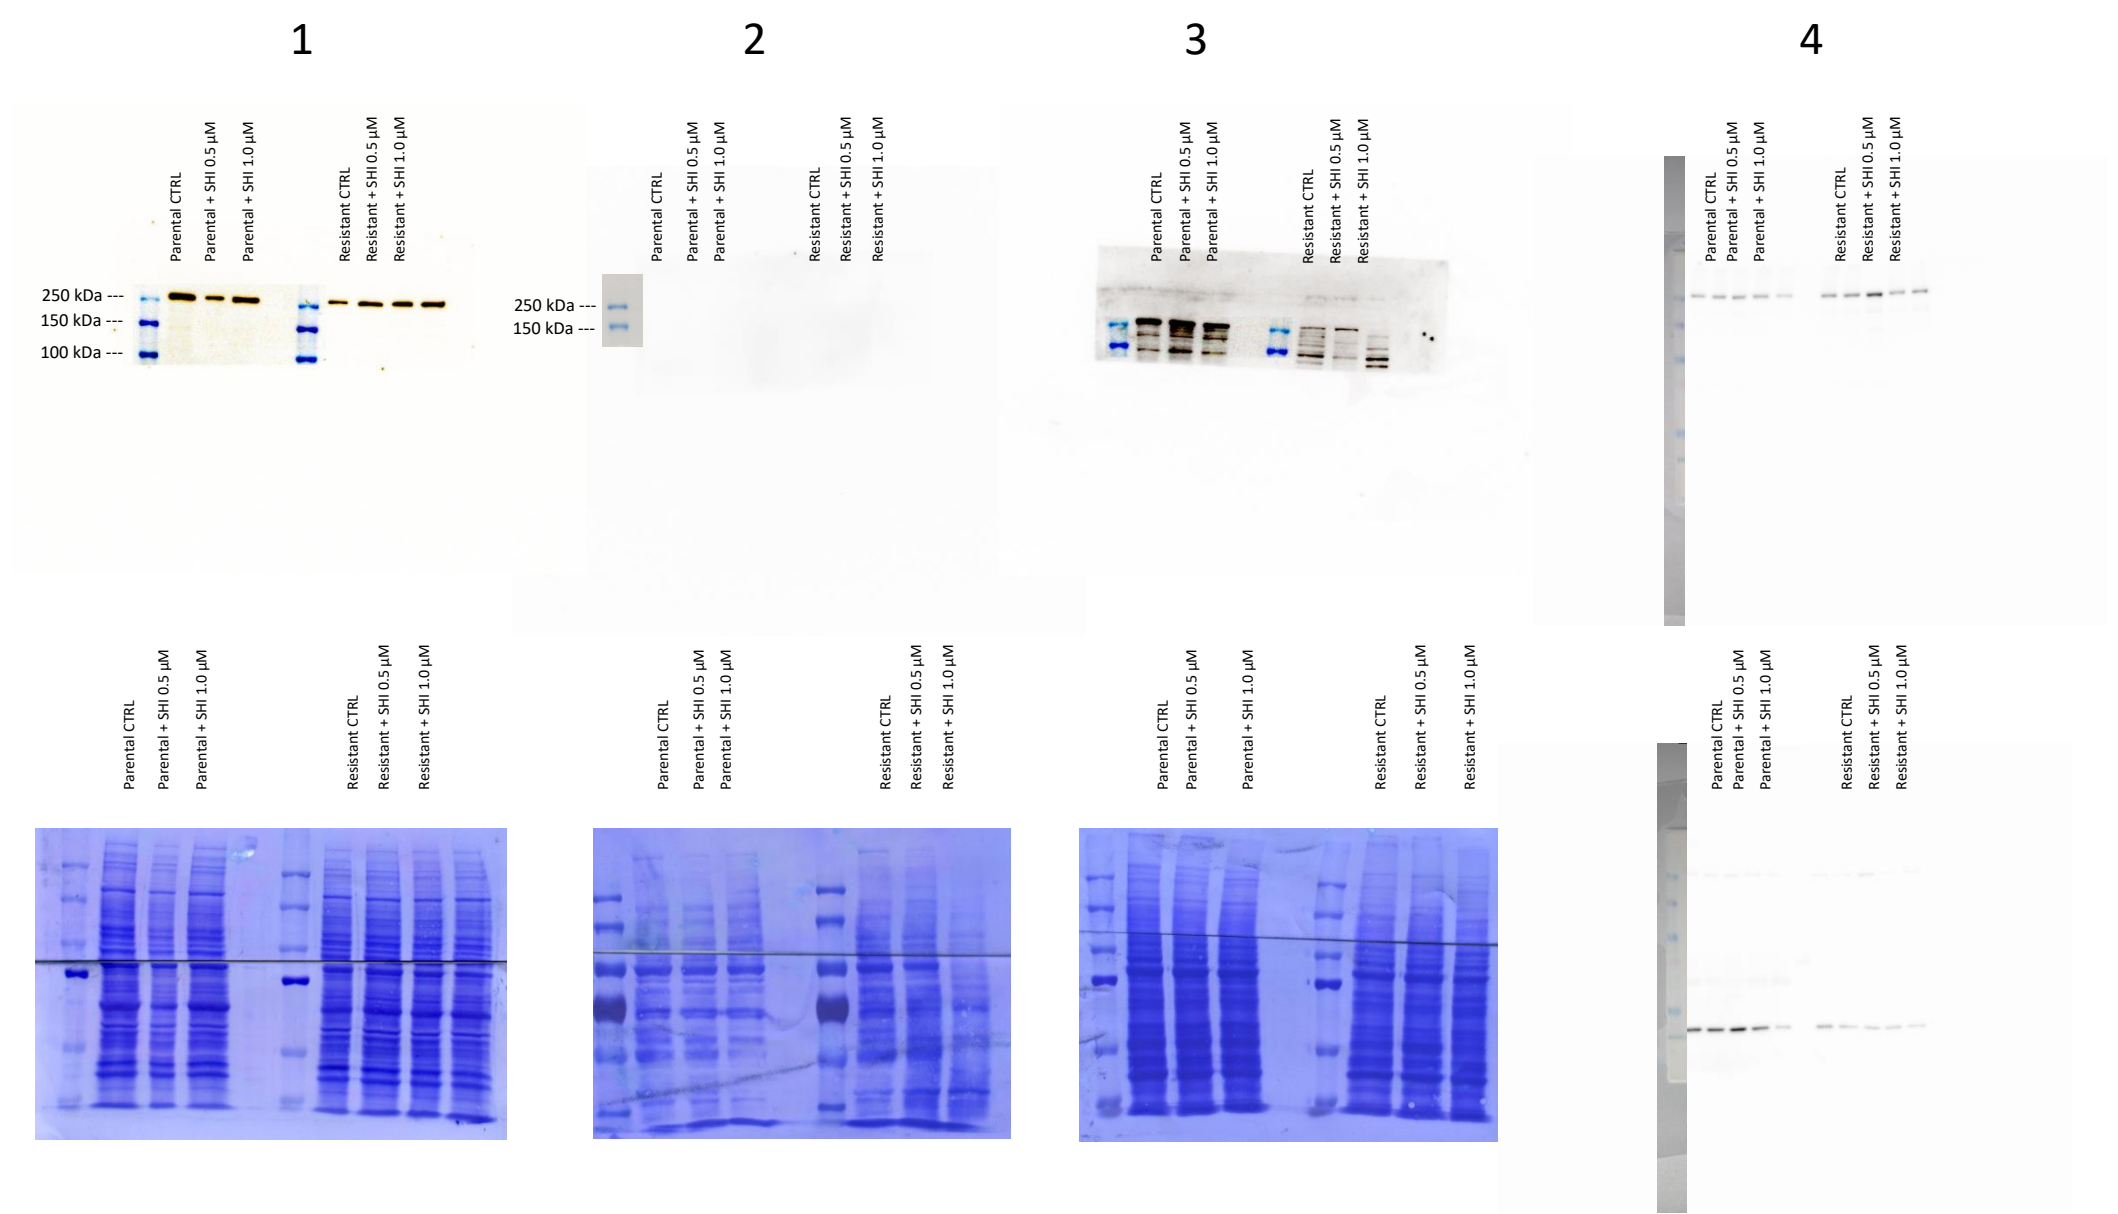

Figure S4d: Detailed information about Figure 11 - AKT/pAKT and mTOR/pmTOR in parental and sunitinib-resistant Caki-1 and 786-O cells after 48 h exposure to SHI [0.5, 1.0  $\mu$ M]. Protein expression of pmTOR (#), corresponding protein expression of  $\beta$ -actin or Coomassie blue staining of total protein (\*).

786-O

(#)

AKT (60 kDa)

(\*)

Total protein

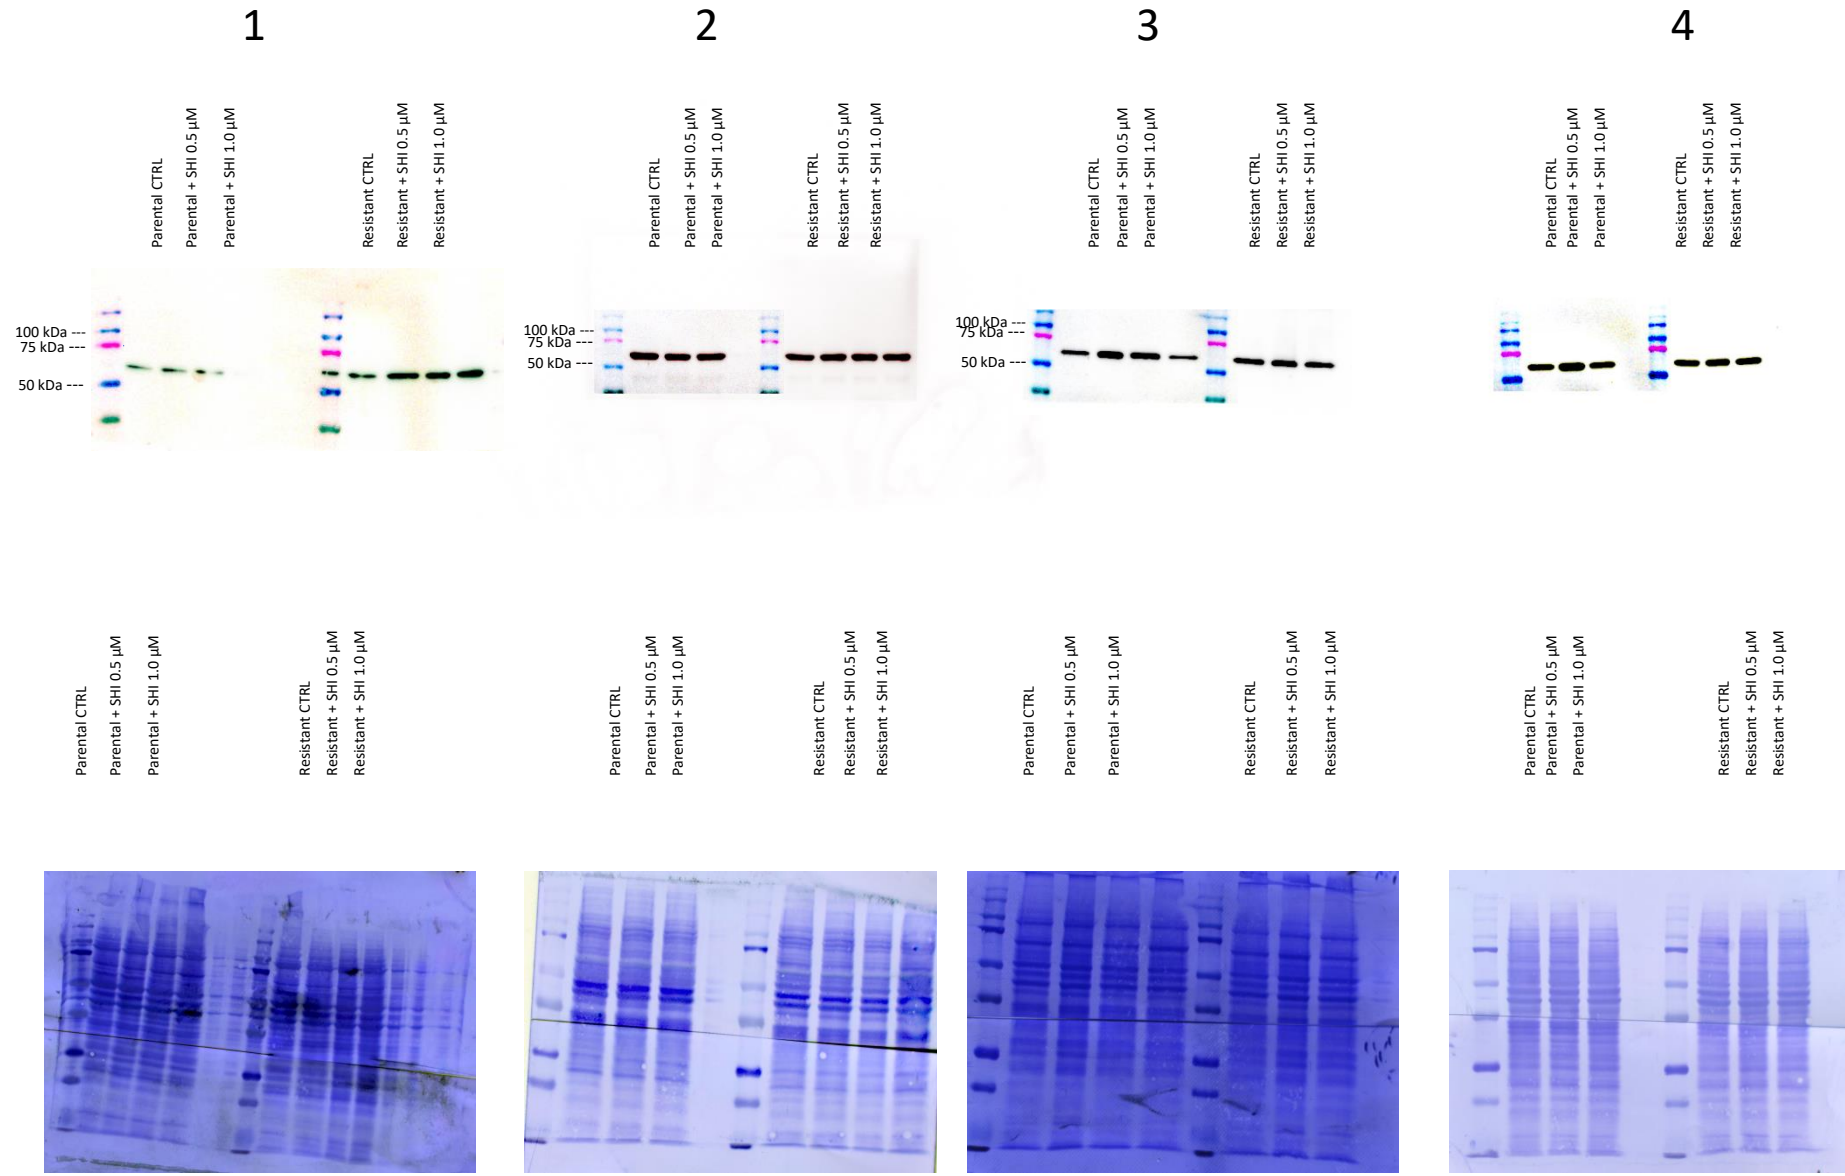

Figure S4e: Detailed information about Figure 11 - AKT/pAKT and mTOR/pmTOR in parental and sunitinib-resistant Caki-1 and 786-O cells after 48 h exposure to SHI [0.5, 1.0  $\mu$ M]. Protein expression of AKT (#), corresponding Coomassie blue staining of total protein (\*).



786-O

(#)

pAKT (60 kDa)

(\*)

Total protein

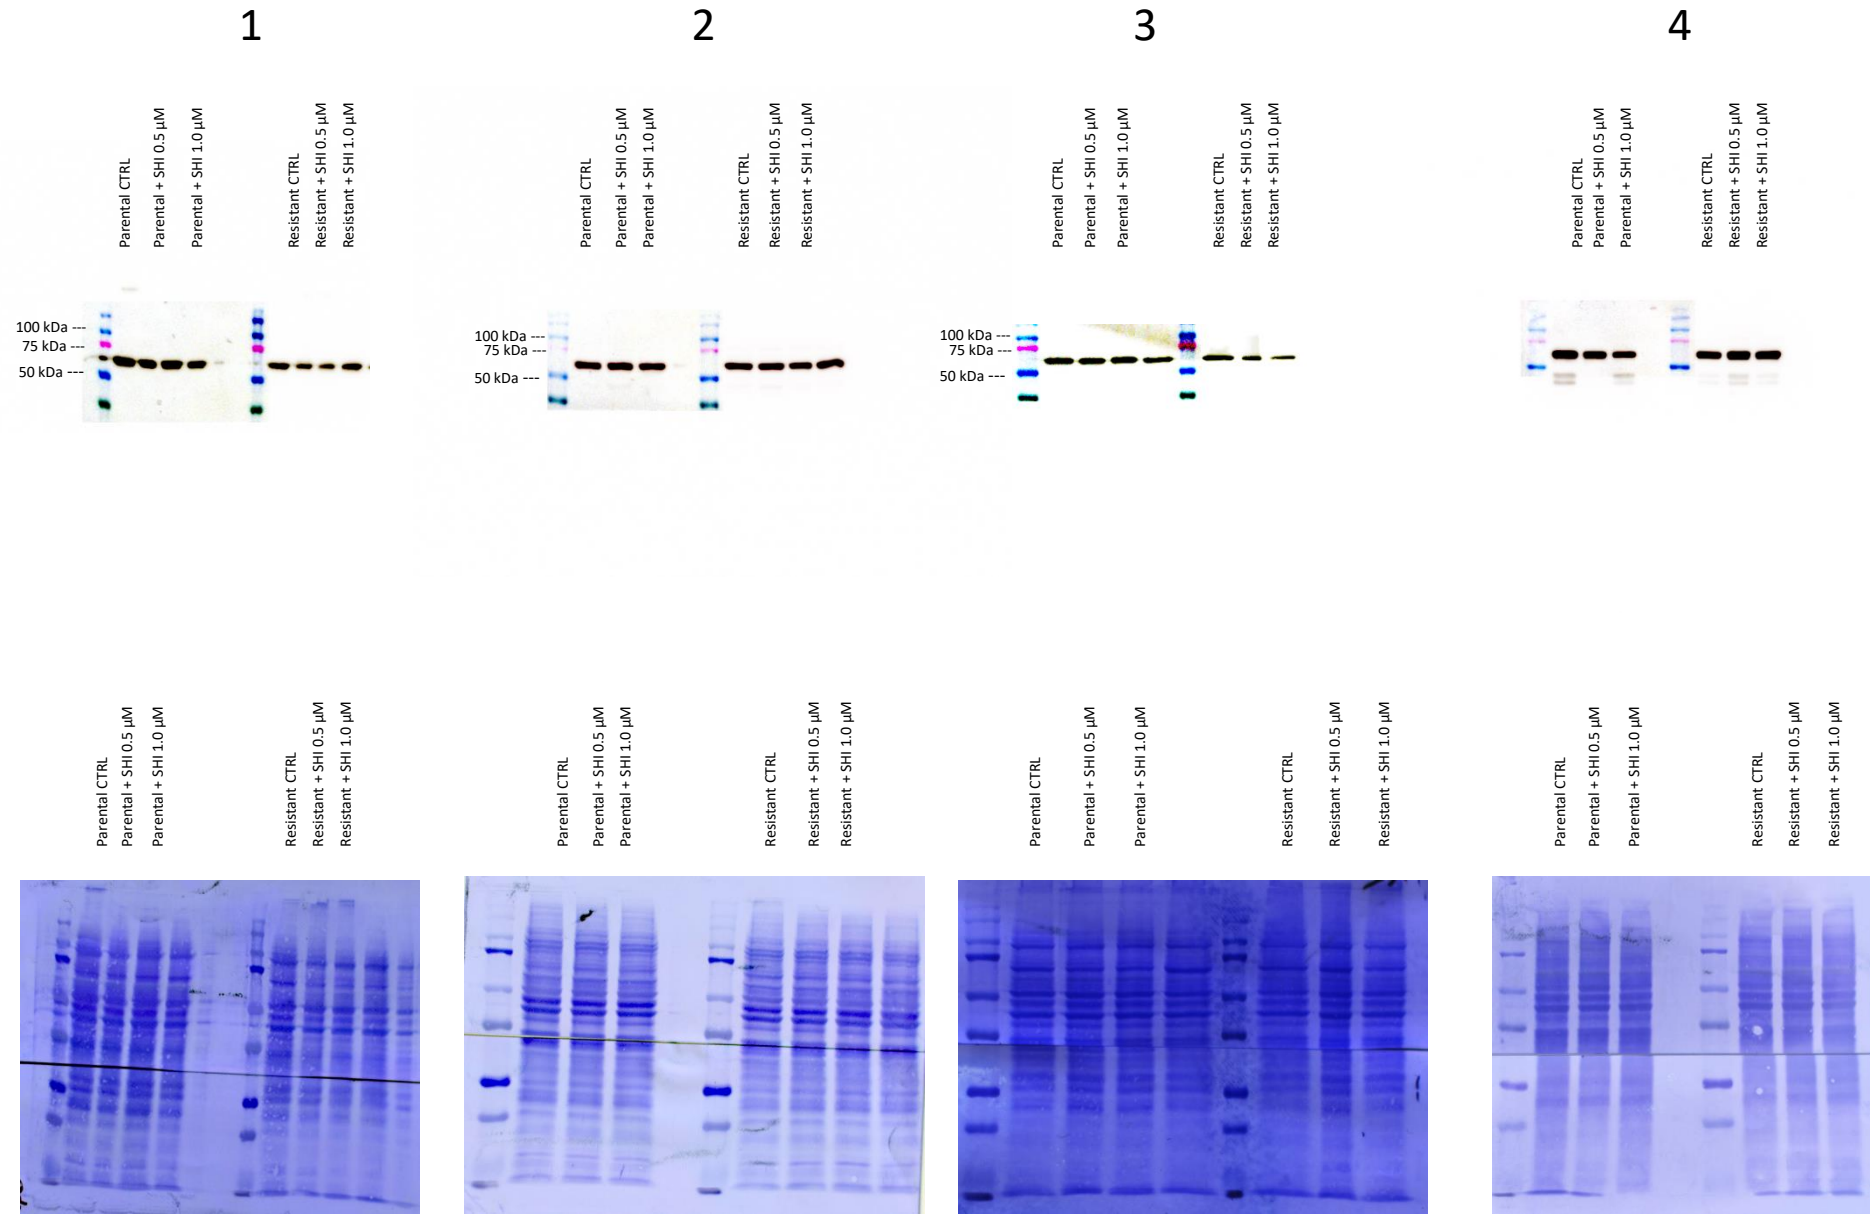

Figure S4f: Detailed information about Figure 11 - AKT/pAKT and mTOR/pmTOR in parental and sunitinib-resistant Caki-1 and 786-O cells after 48 h exposure to SHI [0.5, 1.0  $\mu$ M]. Protein expression of pAKT (#), corresponding Coomassie blue staining of total protein (\*).

786-O

(#)

mTOR (289 kDa)

(\*)

Total protein

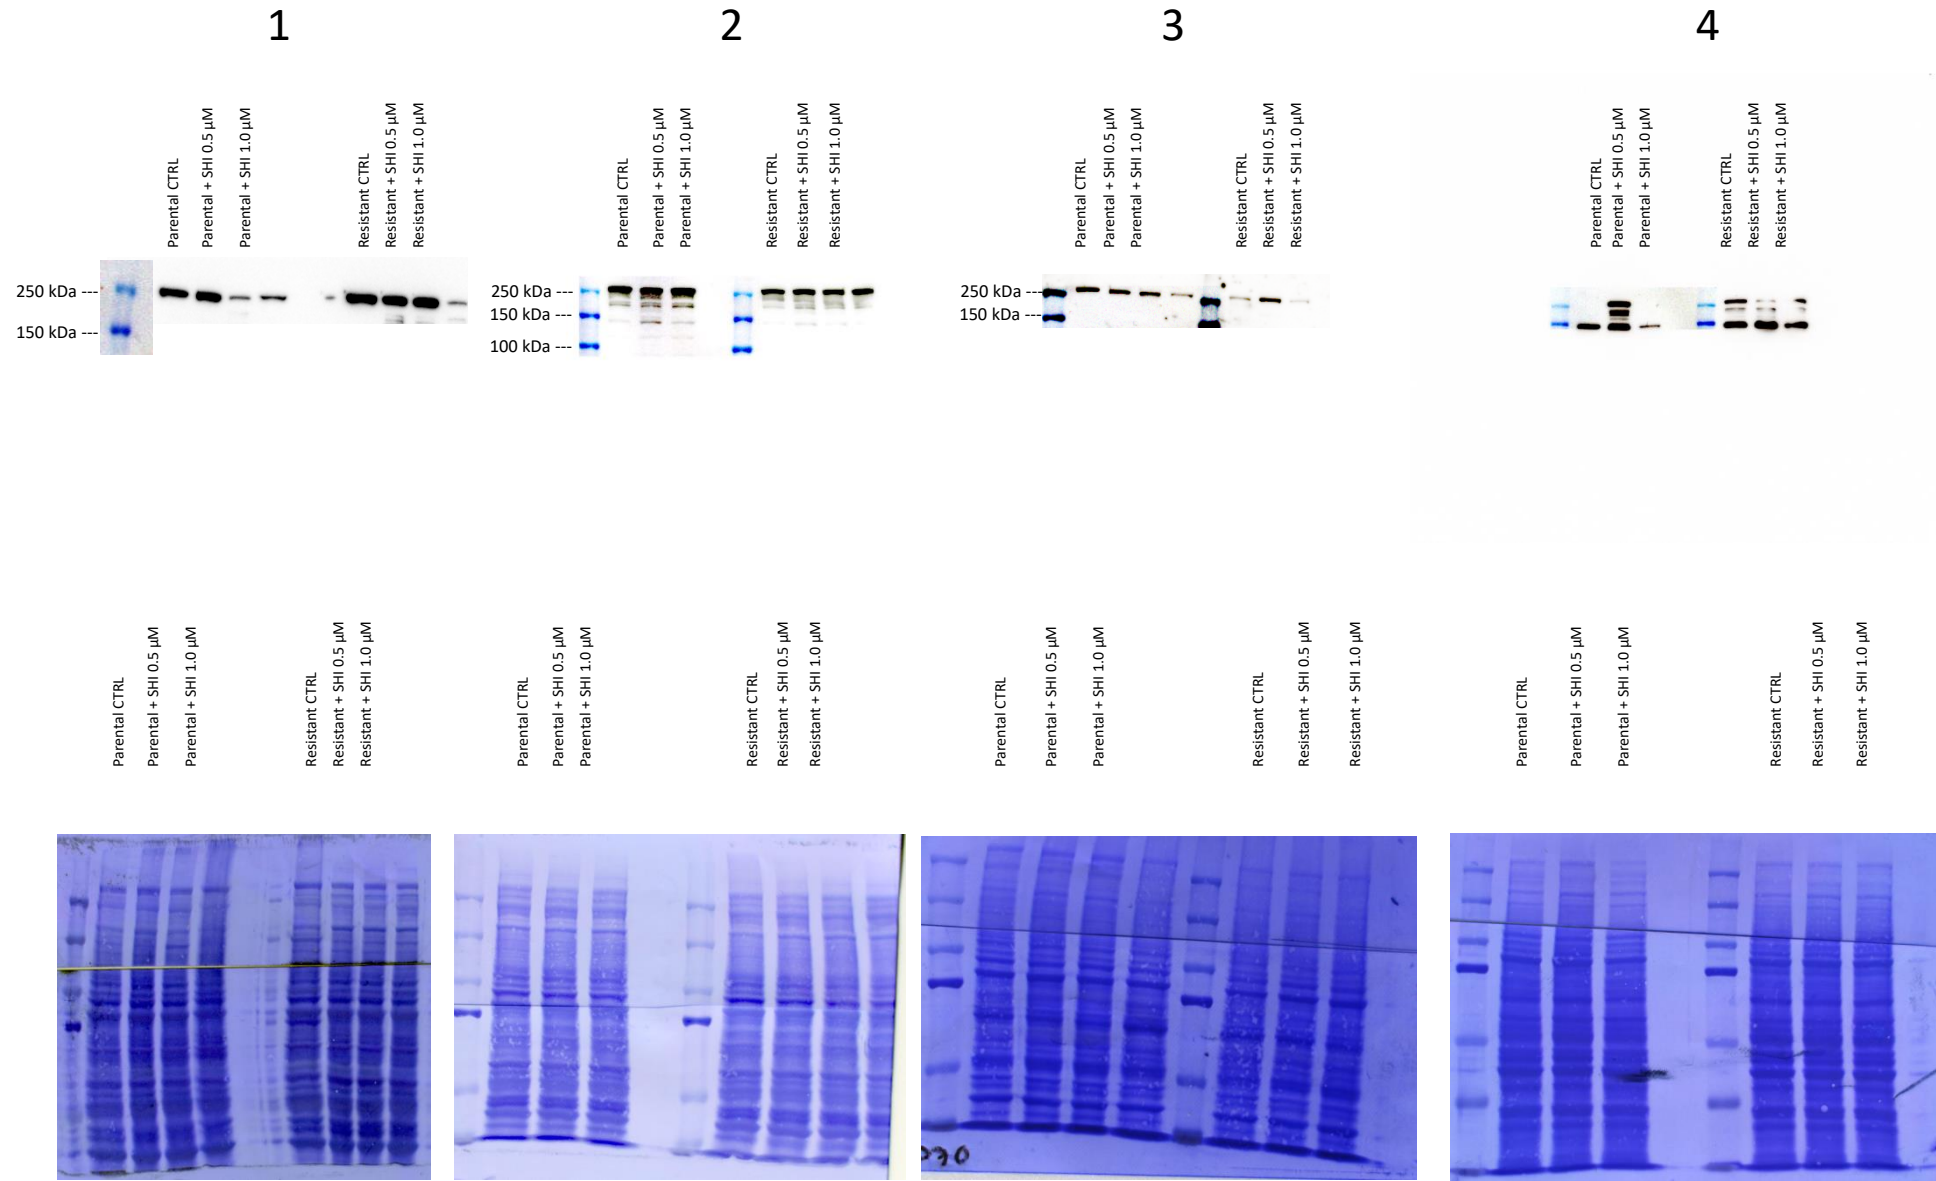

Figure S4g: Detailed information about Figure 11 - AKT/pAKT and mTOR/pmTOR in parental and sunitinib-resistant Caki-1 and 786-O cells after 48 h exposure to SHI [0.5, 1.0  $\mu$ M]. Protein expression of mTOR (#), corresponding Coomassie blue staining of total protein (\*).

786-O

(#)

pmTOR (289 kDa)

(\*)

Total protein

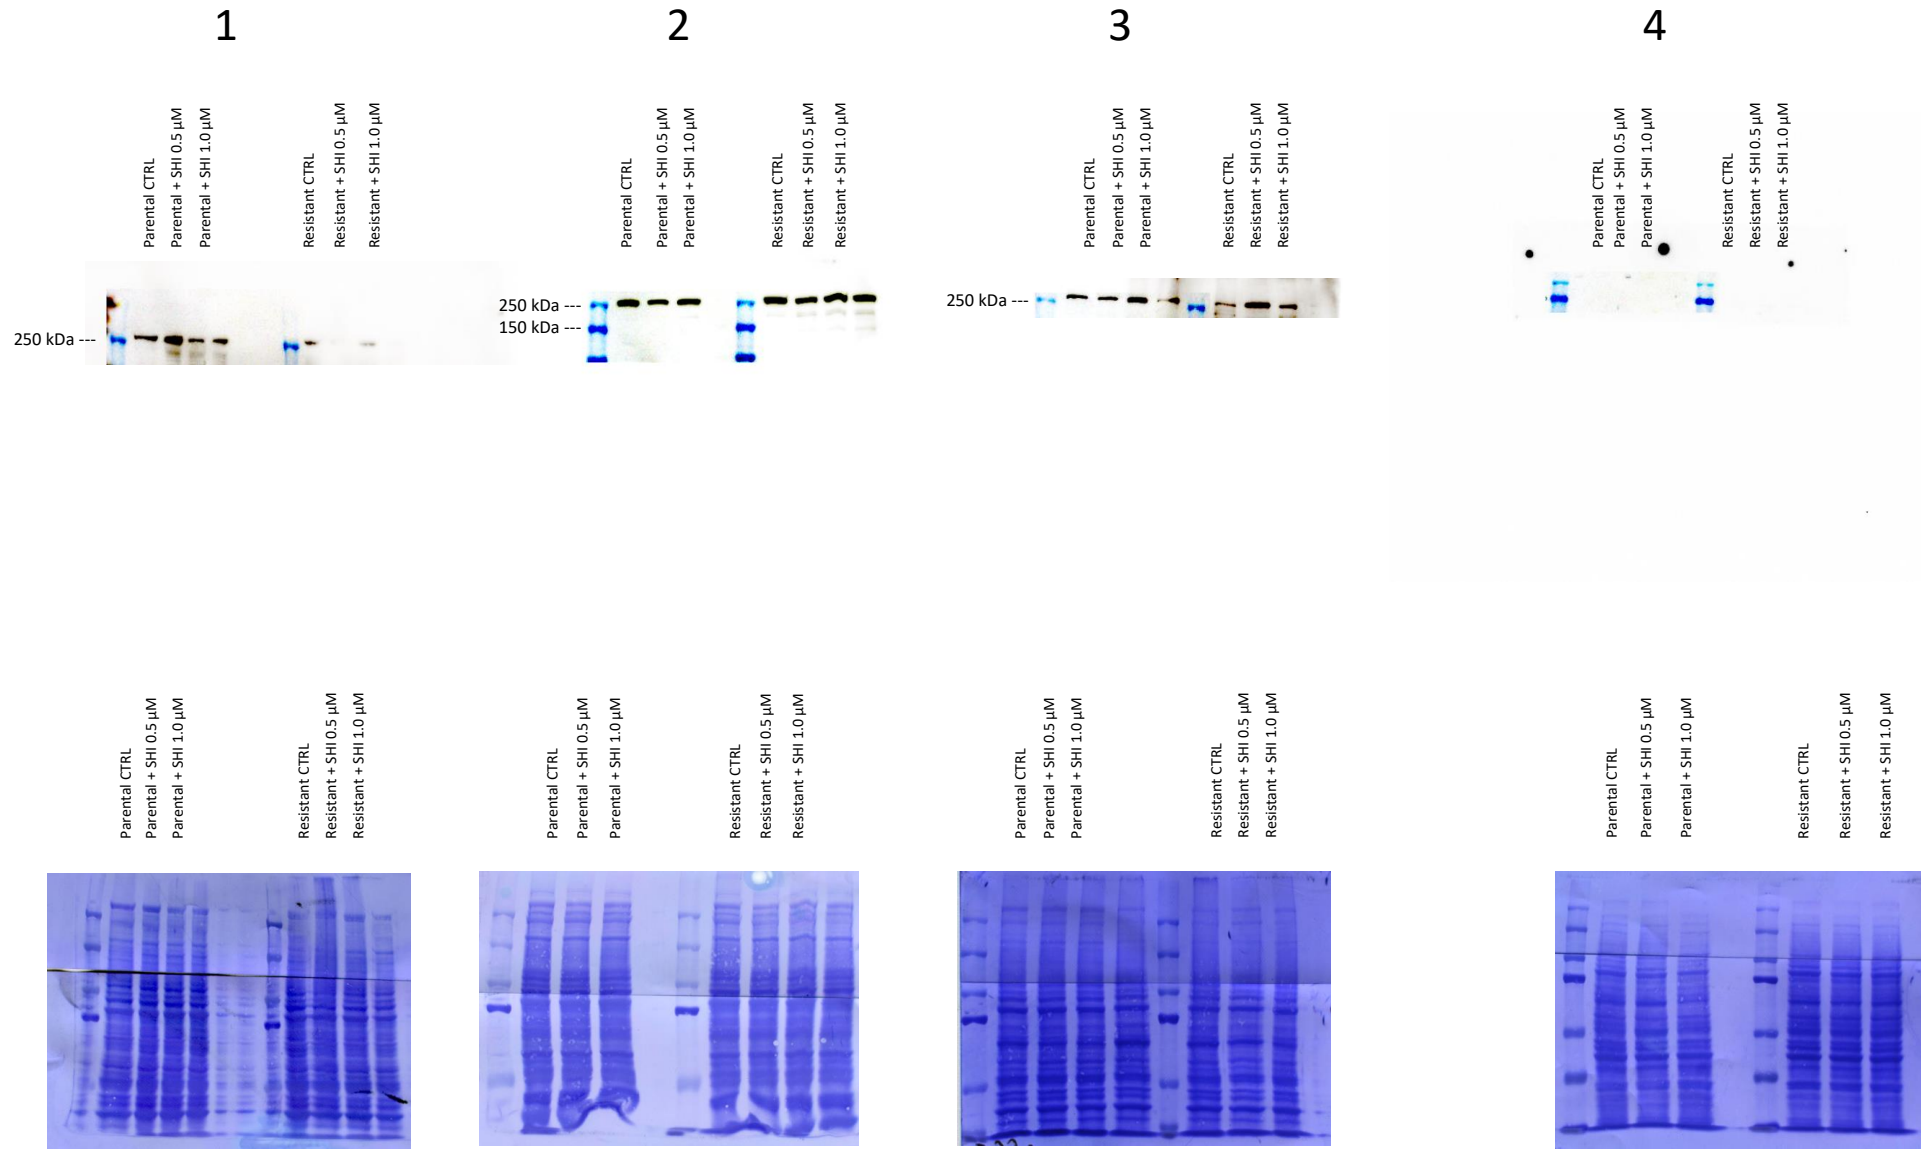

Figure S4h: Detailed information about Figure 11 - AKT/pAKT and mTOR/pmTOR in parental and sunitinib-resistant Caki-1 and 786-O cells after 48 h exposure to SHI [0.5, 1.0  $\mu$ M]. Protein expression of pmTOR (#), corresponding Coomassie blue staining of total protein (\*).
